# Supplementary material for: Unveiling the signaling network of FLT3-ITD AML improves drug sensitivity prediction
Source: eLife journal article supplement (doi:10.7554/elife.90532), 2023-10-24
Supplement: fig4-data2 [file elife-90532-fig4-data2-v1.pdf]

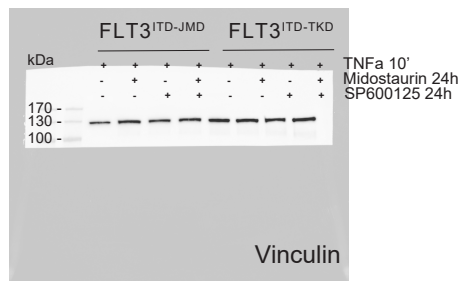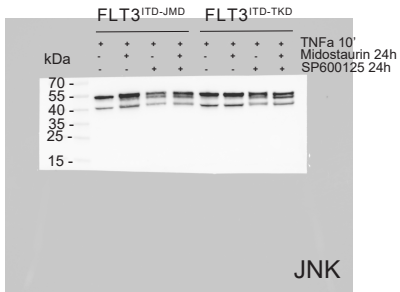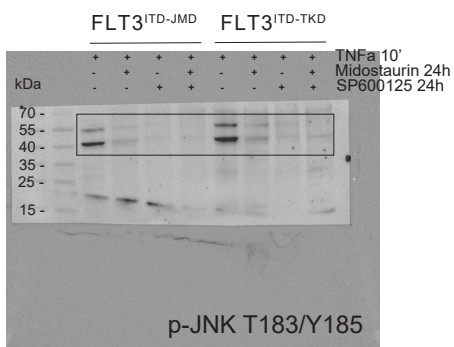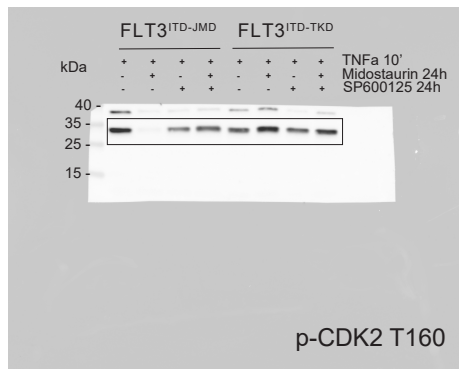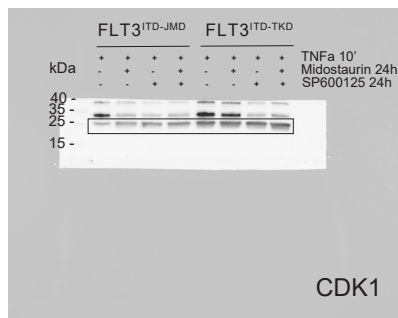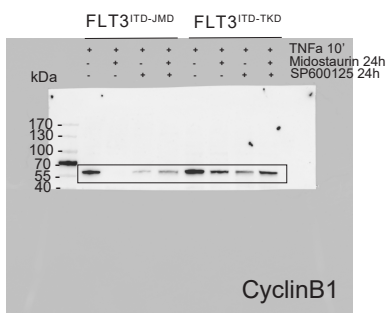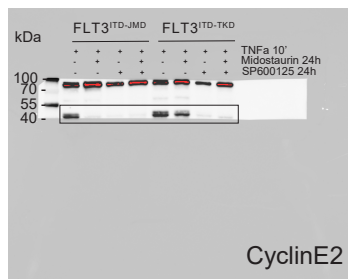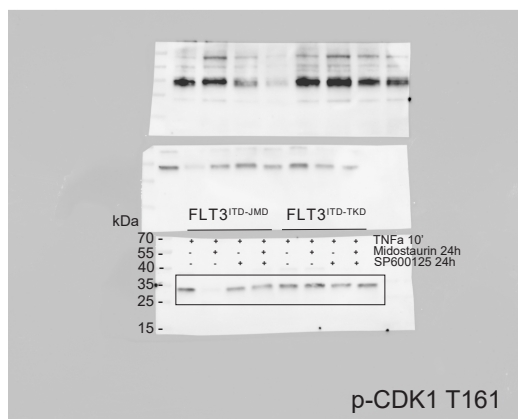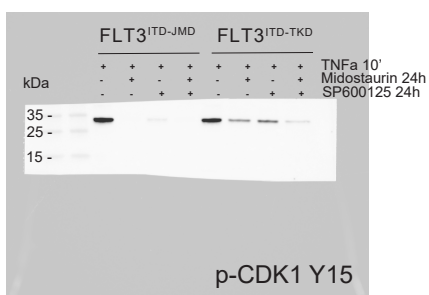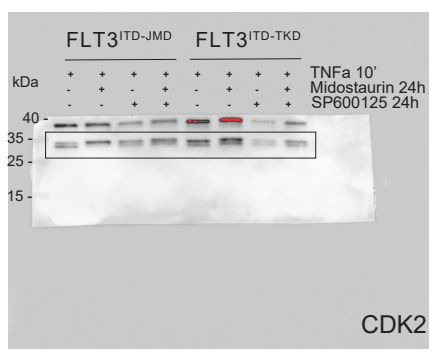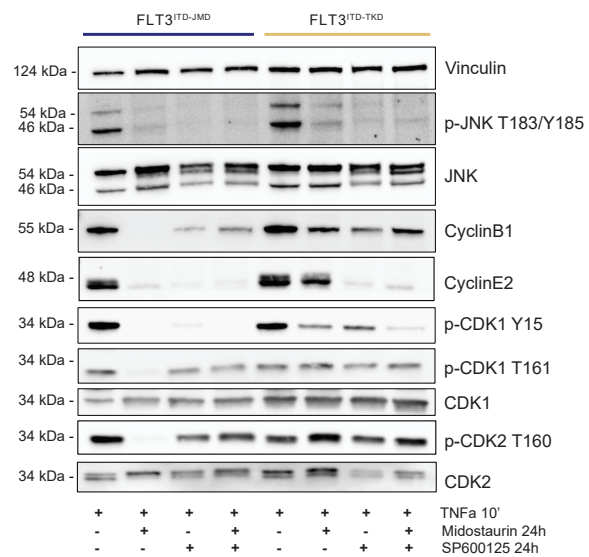

Figure 4
