# Supplementary material for: Unveiling the signaling network of FLT3-ITD AML improves drug sensitivity prediction
Source: eLife. 2024 Apr 2;12:RP90532. doi: 10.7554/eLife.90532 (PMC10987088; doi:10.7554/eLife.90532)
Supplement: Supplementary file 1. [file elife-90532-supp1.xlsx]

## Sheet: FLT3-ITD PKN
Pre-PKN derived from SIGNOR resource
ENTITYA	TYPEA	IDA	DATABASEA	ENTITYB	TYPEB	IDB	DATABASEB	EFFECT	MECHANISM	RESIDUE	SEQUENCE	TAX_ID	CELL_DATA	TISSUE_DATA	MODULATOR_COMPLEX	TARGET_COMPLEX	MODIFICATIONA	MODASEQ	MODIFICATIONB	MODBSEQ	PMID	DIRECT	NOTES	ANNOTATOR	SENTENCE	SCORE	SIGNOR_ID
MYC	protein	P01106	UNIPROT	Proliferation	phenotype	SIGNOR-PH4	SIGNOR	up-regulates				9606									9552384	NO		gcesareni	C-myc has emerged as one of the central regulators of mammalian cell proliferation.	0.7	SIGNOR-56572
ATM	protein	Q13315	UNIPROT	TP53	protein	P04637	UNIPROT	up-regulates quantity by stabilization	phosphorylation	Ser9	EEPQSDPsVEPPLSQ	9606									11875057	YES		gcesareni	In response to ionizing radiation (ir), atm, the gene product mutated in ataxia telangiectasia, stabilizes and activates p53 through phosphorylation of ser15 and (indirectly) ser20. Here we show that phosphorylation of p53 on ser46, a residue important for p53 apoptotic activity, as well as on ser9, in response to ir also is dependent on the atm protein kinase. one pathway involves the phosphoryl…	0.819	SIGNOR-115348
PDPK1	protein	O15530	UNIPROT	RPS6KA1	protein	Q15418	UNIPROT	up-regulates activity	phosphorylation	Ser221	DHEKKAYsFCGTVEY	9534	BTO:0000298								10480933	YES		miannu	Full-length RSK1, RSK2, and RSK3 Are Activated when Coexpressed with PDK1 in COS7 Cells. Ser221 phosphorylation is increased 2–3-fold during ERK-mediated activation of RSK1 in COS1 cells	0.647	SIGNOR-250270
CREB1	protein	P16220	UNIPROT	Proliferation	phenotype	SIGNOR-PH4	SIGNOR	up-regulates				10090		BTO:0000763							20660310	NO		Luana	Beta-catenin/CBP-driven transcription is critical for maintenance of an undifferentiated/proliferative state	0.7	SIGNOR-261288
BRAF	protein	P15056	UNIPROT	MEK1/2	proteinfamily	SIGNOR-PF25	SIGNOR	up-regulates activity	phosphorylation			-1									8413257	YES		lperfetto	Raf-1 phosphorylation of MEK activated it, as judged by its ability to stimulate the phosphorylation of myelin basic protein by glutathione S-transferase-ERK1.	0.822	SIGNOR-244831
MTOR	protein	P42345	UNIPROT	Proliferation	phenotype	SIGNOR-PH4	SIGNOR	up-regulates				9606		BTO:0001103							15829723	NO		apalma	Phosphorylation of mTOR by Akt leads to mTOR activation (40, 52) and the subsequent activation of p70S6K (47). This latter event has great potential importance for the promotion of muscle growth by the IGF-I/Akt/mTOR pathway, because p70S6k is a potent stimulator of protein synthesis that can be activated by increases in muscle contraction	0.7	SIGNOR-255108
MAPKAPK2	protein	P49137	UNIPROT	CREB1	protein	P16220	UNIPROT	up-regulates	phosphorylation	Ser119	EILSRRPsYRKILND	9606									17389598	YES		lperfetto	Neverthless, some transcription factors, such as e47, er81, srf and creb are also phosphorylated by mk2.	0.674	SIGNOR-153944
KRAS	protein	P01116	UNIPROT	PI3K	complex	SIGNOR-C156	SIGNOR	up-regulates	binding			9606									21779497	YES		gcesareni	Grb2 binds and activates sos, which then activates ras, and this activates p110 independently of p85./it was also described that ras interacts with pi3k in a direct manner./lysine residue 227 is essential for the interaction of ras with pi3k phosphatidylinositol 3-kinase (pi3k) is one of the main effector pathways of ras, regulating cell growth, cell cycle entry, cell survival, cytoskeleton reorg…	0.723	SIGNOR-252698
AMPK	complex	SIGNOR-C15	SIGNOR	MTOR	protein	P42345	UNIPROT	up-regulates activity	phosphorylation	Ser1261	PMKKLHVsTINLQKA	10090	BTO:0002572								31186373	YES		miannu	AMPK directly activates mTORC2 to promote cell survival during acute energetic stress. AMPK associates with and phosphorylates mTOR within mTORC2., these data indicate that AMPK phosphorylates mTOR on Ser1261 within mTORC2, an event that correlates with increased mTORC2 autophosphorylation and downstream signaling.	0.549	SIGNOR-262535
NfKb-p65/p50	complex	SIGNOR-C13	SIGNOR	Proliferation	phenotype	SIGNOR-PH4	SIGNOR	up-regulates				9606									11359934	NO		gcesareni	The nuclear factor-kappaB (NF-kappaB) family of transcription factors has been shown to regulate proliferation in several cell types.	0.7	SIGNOR-245043
ERK1/2	proteinfamily	SIGNOR-PF1	SIGNOR	RPS6KA1	protein	Q15418	UNIPROT	up-regulates activity	phosphorylation	Ser221	DHEKKAYsFCGTVEY	9534	BTO:0004055								9430688	YES		lperfetto	Several lines of evidence indicate that the mapkap-k1 isoforms are also activated by mapks in vivo via the ras-dependent protein kinase cascade that is triggered by growth factors or tumor-promoting phorbol esters, such as phorbol 12-myristate 13-acetate (pma). here we identify six sites in mapkap-k1a that become phosphorylated in transfected cos-1 cells. The inactive form of mapkap-k1a in unstim…	0.2	SIGNOR-250553
CHEK2	protein	O96017	UNIPROT	TP53	protein	P04637	UNIPROT	up-regulates quantity by stabilization	phosphorylation	Ser37	NVLSPLPsQAMDDLM	9606									10656682	YES		gcesareni	Chk1/chk2 and atm/atr also phosphorylate the effector p53, increasing its stability.We Have demonstrated that the human homologs of the checkpoint kinases, chk1 and chk2/hcds1, phosphorylate at least three dna damage-inducible phosphorylation sites in p53.	0.756	SIGNOR-74831
CHEK2	protein	O96017	UNIPROT	TP53	protein	P04637	UNIPROT	up-regulates quantity by stabilization	phosphorylation	Thr18	EPPLSQEtFSDLWKL	9606	BTO:0000567								10673501	YES		gcesareni	Chk1/chk2 and atm/atr also phosphorylate the effector p53, increasing its stability.We Have demonstrated that the human homologs of the checkpoint kinases, chk1 and chk2/hcds1, phosphorylate at least three dna damage-inducible phosphorylation sites in p53.	0.756	SIGNOR-75025
CHEK2	protein	O96017	UNIPROT	TP53	protein	P04637	UNIPROT	up-regulates quantity by stabilization	phosphorylation	Ser15	PSVEPPLsQETFSDL	9606									17339337	YES		gcesareni	Chk1/chk2 and atm/atr also phosphorylate the effector p53, increasing its stability. We have demonstrated that the human homologs of the checkpoint kinases, chk1 and chk2/hcds1, phosphorylate at least three dna damage-inducible phosphorylation sites in p53.	0.756	SIGNOR-153463
ATM	protein	Q13315	UNIPROT	TP53	protein	P04637	UNIPROT	up-regulates quantity by stabilization	phosphorylation	Ser15	PSVEPPLsQETFSDL	9606									11875057	YES		gcesareni	In response to ionizing radiation (ir), atm, the gene product mutated in ataxia telangiectasia, stabilizes and activates p53 through phosphorylation of ser15 and (indirectly) ser20. Here we show that phosphorylation of p53 on ser46, a residue important for p53 apoptotic activity, as well as on ser9, in response to ir also is dependent on the atm protein kinase. one pathway involves the phosphoryl…	0.819	SIGNOR-115340
CDKN1A	protein	P38936	UNIPROT	CyclinE/CDK2	complex	SIGNOR-C16	SIGNOR	down-regulates activity	binding			9606	BTO:0000093								11154267	YES		lperfetto	Overexpression of p16INK4a in cells with functional pRb results in inhibition of both Cdk4- and Cdk6-associated kinase activity and pRb phosphorylation, with subsequent cell cycle arrest (46, 50). In addition, inhibition of D cyclin-Cdk4 complex formation by p16INK4a prevents sequestration of p21Cip1 and p27Kip1 by these complexes in early G1, leading to suppression of cyclin E-Cdk2 activity	0.901	SIGNOR-245462
CHEK2	protein	O96017	UNIPROT	TP53	protein	P04637	UNIPROT	up-regulates quantity by stabilization	phosphorylation	Ser37	NVLSPLPsQAMDDLM	9606	BTO:0000567								10673501	YES		gcesareni	Chk1/chk2 and atm/atr also phosphorylate the effector p53, increasing its stability.We Have demonstrated that the human homologs of the checkpoint kinases, chk1 and chk2/hcds1, phosphorylate at least three dna damage-inducible phosphorylation sites in p53.	0.756	SIGNOR-75017
CHEK2	protein	O96017	UNIPROT	TP53	protein	P04637	UNIPROT	up-regulates quantity by stabilization	phosphorylation	Thr18	EPPLSQEtFSDLWKL	9606									10656682	YES		gcesareni	Chk1/chk2 and atm/atr also phosphorylate the effector p53, increasing its stability.We Have demonstrated that the human homologs of the checkpoint kinases, chk1 and chk2/hcds1, phosphorylate at least three dna damage-inducible phosphorylation sites in p53.	0.756	SIGNOR-74839
CHEK2	protein	O96017	UNIPROT	TP53	protein	P04637	UNIPROT	up-regulates quantity by stabilization	phosphorylation	Ser15	PSVEPPLsQETFSDL	9606									10656682	YES		gcesareni	Chk1/chk2 and atm/atr also phosphorylate the effector p53, increasing its stability.We Have demonstrated that the human homologs of the checkpoint kinases, chk1 and chk2/hcds1, phosphorylate at least three dna damage-inducible phosphorylation sites in p53.	0.756	SIGNOR-74823
TP53	protein	P04637	UNIPROT	BAX	protein	Q07812	UNIPROT	up-regulates activity	binding			9606									14963330	YES		lperfetto	Tp53 directly activated the proapoptotic bcl-2 protein bax in the absence of other proteins to permeabilize mitochondria and engage the apoptotic program	0.747	SIGNOR-178690
MAPK14	protein	Q16539	UNIPROT	STAT3	protein	P40763	UNIPROT	up-regulates	phosphorylation	Ser727	NTIDLPMsPRTLDSL	9606									17502367	YES		gcesareni	All stats are phosphorylated on at least one serine residue in their tad specifically, ser727 in stats 1 and 3 and ser721 in stat4. Stat serine kinases have been identified through the use of inhibitors, dominant-negative alleles, and in vitro kinase assays. They include mapk (p38mapk: stats 1, 3, 4;erk: stat3, 5;jnk: stat3), pkc_ (stat1, stat3), mtor (stat3), nlk (stat3 (42)), and camkii and ikk…	0.58	SIGNOR-154783
CHEK2	protein	O96017	UNIPROT	TP53	protein	P04637	UNIPROT	up-regulates quantity by stabilization	phosphorylation	Ser366	PGGSRAHsSHLKSKK	9606	BTO:0000567								10673501	YES		gcesareni	Chk1/chk2 and atm/atr also phosphorylate the effector p53, increasing its stability.We Have demonstrated that the human homologs of the checkpoint kinases, chk1 and chk2/hcds1, phosphorylate at least three dna damage-inducible phosphorylation sites in p53.	0.756	SIGNOR-75013
BCL2	protein	P10415	UNIPROT	BAX	protein	Q07812	UNIPROT	down-regulates activity	binding			9606	BTO:0000776;BTO:0000785								8183370	YES		lperfetto	Bcl-2 has the unique oncogenic role of extending cell survival by inhibiting a variety of apoptotic deaths. Bcl-2 exerts its action through heterodimerization with bax.	0.65	SIGNOR-36898
FLT3	protein	P36888	UNIPROT	PIM1	protein	P11309	UNIPROT	up-regulates quantity by expression	transcriptional regulation			10090									15498859	NO			Pim-1 is a proto-oncogene and is known to be up-regulated by signal transducer and activator of transcription 5 (STAT5), which itself is a downstream target of FLT3 signaling. constitutively activated FLT3 signaling up-regulates Pim-1 expression in leukemia cells.	0.381	SIGNOR-261519
RPS6KA1	protein	Q15418	UNIPROT	GSK3B	protein	P49841	UNIPROT	down-regulates	phosphorylation	Ser9	SGRPRTTsFAESCKP	9606									11584304	YES		lperfetto	S6k then phosphorylates the same serine residue on gsk3 that is targeted by pkb/akt (fig. 1), thereby inhibiting its activity.	0.368	SIGNOR-110917
IKK-complex	complex	SIGNOR-C14	SIGNOR	NfKb-p65/p50	complex	SIGNOR-C13	SIGNOR	up-regulates	phosphorylation			9606									15489227	YES		lperfetto	Chromatographic fractionation of cell extracts allowed the identification of two distinct enzymatic activities phosphorylating ser-536. Peak 1 represents an unknown kinase, whereas peak 2 contained ikkalpha, ikkbeta, ikkepsilon, and tbk1. collectively, our results provide evidence for at least five kinases that converge on ser-536 of p65 and a novel function for this phosphorylation site in the r…	0.816	SIGNOR-216341
MEK1/2	proteinfamily	SIGNOR-PF25	SIGNOR	CHEK1	protein	O14757	UNIPROT	up-regulates quantity by expression	transcriptional regulation			9606									28138032	NO		miannu	Mechanistically, Ras-MEK signaling drives Chk1 expression and promotes cancer cell growth that produces genotoxic stress that requires Chk1 to mediate a response to the consequent DNA damage. Reciprocally, Chk1 engages a negative feedback loop to prevent hyperactivation of Ras-MEK signaling, thereby limiting DNA damage. Ras–MEK signaling transcriptionally activates Chk1, which appears to sustain …	0.2	SIGNOR-263069
CREB1	protein	P16220	UNIPROT	PKM	protein	P14618	UNIPROT	up-regulates quantity by expression	transcriptional regulation			9606									16308421	NO		gcesareni	In fasted mammals, glucose homeostasis is maintained through induction of the camp response element-binding protein (creb) coactivator transducer of regulated creb activity 2 (torc2), which stimulates the gluconeogenic program in concert with the forkhead factor foxo1	0.241	SIGNOR-142103
AKT	proteinfamily	SIGNOR-PF24	SIGNOR	BAD	protein	Q92934	UNIPROT	down-regulates activity	phosphorylation	Ser118	GRELRRMsDEFVDSF	9606	BTO:0000938								9346240	YES		lperfetto	Experiments in this study reveal that akt phosphorylates bad both in vitro and in vivo and that akt-mediated phosphorylation of bad effectively blocks bad induced cell death.[...] In addition, these findings implicate a particular phosphorylation site on bad, serine 136, in the suppression of bad-mediated death by akt.[...]The Phosphorylation of bad may lead to the prevention of cell death via a …	0.2	SIGNOR-244148
AKT	proteinfamily	SIGNOR-PF24	SIGNOR	BRAF	protein	P15056	UNIPROT	down-regulates	phosphorylation	Ser428	GPQRERKsSSSSEDR	9606									10869359	YES		lperfetto	We show that phosphorylation of b-raf by akt occurs at multiple residues within its amino terminal regulatory domain, at both the conserved and unique phosphorylation sites. Akt phosphorylated b-raf on s364 and s428 to inactivate its kinase activity b-raf contains three akt consensus sites, table i. One site, ser364 is conserved with c-raf;however, two sites, ser428 and thr439, are unique to b-raf	0.2	SIGNOR-244160
PARP1	protein	P09874	UNIPROT	TP53	protein	P04637	UNIPROT	up-regulates activity	relocalization			9606									17891139	YES		miannu	We identify the major poly(ADP-ribosyl)ated sites of p53 by PARP-1 and find that PARP-1-mediated poly(ADP-ribosyl)ation blocks the interaction between p53 and the nuclear export receptor Crm1, resulting in nuclear accumulation of p53. These findings molecularly link PARP-1 and p53 in the DNA-damage response, providing the mechanism for how p53 accumulates in the nucleus in response to DNA damage.…	0.538	SIGNOR-261321
CHEK2	protein	O96017	UNIPROT	RB1	protein	P06400	UNIPROT	up-regulates activity	phosphorylation	Ser612	MYLSPVRsPKKKGST	9606	BTO:0000093								17380128	YES		lperfetto	Phosphorylation of prb at ser612 by chk1/2 leads to a complex between prb and e2f-1 after dna damageprb inhibits cell cycle progression through interactions with the e2f family of transcription factors. Here, we report that dna damage induced not only the dephosphorylation of prb at cdk phosphorylation sites and the binding of prb to e2f-1, but also the phosphorylation of prb at ser612. Phosphory…	0.422	SIGNOR-153908
MTOR	protein	P42345	UNIPROT	AKT	proteinfamily	SIGNOR-PF24	SIGNOR	up-regulates activity	phosphorylation			9606	BTO:0000132		SIGNOR-C2						21592956	YES		lperfetto	Protein kinase B (PKB, Akt) is a Ser/Thr kinase involved in the regulation of cell survival, proliferation, and metabolism and is activated by dual phosphorylation on Thr(308) in the activation loop and Ser(473) in the hydrophobic motif. It plays a contributory role to platelet function, although little is known about its regulation. In this study, we investigated the role of the mammalian target…	0.924	SIGNOR-244417
AKT	proteinfamily	SIGNOR-PF24	SIGNOR	FOXO	proteinfamily	SIGNOR-PF27	SIGNOR	down-regulates	phosphorylation	Ser262	TFRPRSSsNASSVST	9606									16272144	YES		lperfetto	Foxo4 transcription factor, also referred to afx, contains three putative phosphorylation motif sites for protein kinase b (pkb), thr32, ser197, and ser262, and it is proposed that phosphorylated foxo4 stays in the cytosol and is imported to the nucleus through dephosphorylation to induce target gene expression	0.901	SIGNOR-252829
DNA_damage	stimulus	SIGNOR-ST1	SIGNOR	CHEK2	protein	O96017	UNIPROT	up-regulates activity				9606									19151762	NO		lperfetto	Cell cycle progression is monitored constantly to ensure faithful passage of genetic codes and genome stability. We have demonstrated previously that, upon DNA damage, TTK/hMps1 activates the checkpoint kinase CHK2 by phosphorylating CHK2 at Thr68	0.7	SIGNOR-242605
CyclinE/CDK2	complex	SIGNOR-C16	SIGNOR	Proliferation	phenotype	SIGNOR-PH4	SIGNOR	up-regulates				9606									21524151	NO		miannu	In its hypophosphorylated state, pRb binds transcription factors of the E2F family which are required for cell cycle progression. As the level of CyclinD/Cdk4/6 complexes increases, pRb becomes phosphorylated and progression through G1 occurs. At a critical level of phosphorylation, E2F is released from pRb. This activates the transcription of CyclinE which complexes with Cdk2 to fully release pR…	0.7	SIGNOR-262532
CHEK2	protein	O96017	UNIPROT	TP53	protein	P04637	UNIPROT	up-regulates quantity by stabilization	phosphorylation	Ser366	PGGSRAHsSHLKSKK	9606	BTO:0001321								15659650	YES		lperfetto	The cell cycle checkpoint kinases CHK1 and CHK2 have been shown to phosphorylate multiple sites in the N-terminal domain of p53, consequently leading to p53 stabilization and activation. Phosphorylation of at least three of these sites, Ser366, Ser378, and Thr387, was induced by DNA damage.	0.756	SIGNOR-75633
AMPK	complex	SIGNOR-C15	SIGNOR	FOXO	proteinfamily	SIGNOR-PF27	SIGNOR	up-regulates activity	phosphorylation	Ser399	DNITLPPsQPSPTGG	9606	BTO:0000007								17711846	YES		gcesareni	Phosphorylation by AMPK leads to the activtion of FOXO3 transcriptional activity without affecting FOXO3 subcellular localization.	0.396	SIGNOR-252880
PTPN11	protein	Q06124	UNIPROT	KRAS	protein	P01116	UNIPROT	up-regulates activity	dephosphorylation	Tyr32	QNHFVDEyDPTIEDS	9606	BTO:0000007								26617336	YES		irozzo	Here we identify SHP2 as the ubiquitously expressed tyrosine phosphatase that preferentially binds to and dephosphorylates Ras to increase its association with Raf and activate downstream proliferative Ras/ERK/MAPK signalling.	0.627	SIGNOR-255982
STAT5A	protein	P42229	UNIPROT	PIM1	protein	P11309	UNIPROT	up-regulates quantity by expression	transcriptional regulation			10090									15498859	YES			Pim-1 is a proto-oncogene and is known to be up-regulated by signal transducer and activator of transcription 5 (STAT5), which itself is a downstream target of FLT3 signaling. constitutively activated FLT3 signaling up-regulates Pim-1 expression in leukemia cells.	0.345	SIGNOR-261517
AKT	proteinfamily	SIGNOR-PF24	SIGNOR	CDKN1A	protein	P38936	UNIPROT	up-regulates quantity by stabilization	phosphorylation	Thr145	QGRKRRQtSMTDFYH	9606									16982699	YES		gcesareni	Whereas akt1 phosphorylates p21, inducing its release from cdk2 and cytoplasmic localization as previously described for akt, akt2 binds p21 in the region spanning the t145 site of p21, thus competing with phosphorylation by akt1 and inducing its accumulation in the nucleus. These distinct roles of akt/pkb isoforms in modulating proliferation and p21 have important implications for the developmen…	0.2	SIGNOR-244180
ERK1/2	proteinfamily	SIGNOR-PF1	SIGNOR	BCL2	protein	P10415	UNIPROT	up-regulates quantity by stabilization	phosphorylation	Ser87	AAAGPALsPVPPVVH	9606	BTO:0000567								10669763	YES		lperfetto	The results of this study reveal the following novel findings: destruction of the three putative MAP kinase sites at positions 56, 74, and 87 results in ubiquitination and subsequent degradation of the protein. Progressive inactivation of these MAP kinase sites revealed that Bcl-2 stability is mainly regulated by phosphorylation at Thr74 and Ser87, with Ser87 phosphorylation playing a predominant…	0.2	SIGNOR-244505
ERK1/2	proteinfamily	SIGNOR-PF1	SIGNOR	PARP1	protein	P09874	UNIPROT	up-regulates	phosphorylation	Thr373	AATPPPStASAPAAV	9606	BTO:0000938	BTO:0000142							16627622	YES		lperfetto	Parp1 phosphorylation by erk1/2 is required for maximal parp-1 activation after dna damage. S372a and t373a mutations impaired parp-1 activation.	0.2	SIGNOR-244673
CHEK2	protein	O96017	UNIPROT	TP53	protein	P04637	UNIPROT	up-regulates quantity by stabilization	phosphorylation	Thr18	EPPLSQEtFSDLWKL	9606	BTO:0000776								17339337	YES		gcesareni	Chk1/chk2 and atm/atr also phosphorylate the effector p53, increasing its stability.We Have demonstrated that the human homologs of the checkpoint kinases, chk1 and chk2/hcds1, phosphorylate at least three dna damage-inducible phosphorylation sites in p53.	0.756	SIGNOR-153483
NFKBIA	protein	P25963	UNIPROT	NfKb-p65/p50	complex	SIGNOR-C13	SIGNOR	down-regulates activity	binding			9606									1340770	YES		lperfetto	Nf-kappa b is an inducible transcription factor comprised of a 50-kd (p50) and a 65-kd (p65) subunit. Induction of nf-kappa b activity, which is a critical event in many signal transduction pathways, involves release from a cytoplasmic inhibitory protein, i kappa b, followed by translocation of the active transcription factor complex into the nucleus. we demonstrate by in vitro and in vivo method…	0.841	SIGNOR-217394
TP53	protein	P04637	UNIPROT	BAX	protein	Q07812	UNIPROT	up-regulates quantity by expression	transcriptional regulation			9606									9122197	NO		gcesareni	P53 can transcriptionally activate bax, a bcl-2 family member that promotes apoptosis	0.747	SIGNOR-47541
KU-55933	chemical	CID:5278396	PUBCHEM	ATM	protein	Q13315	UNIPROT	down-regulates activity	chemical inhibition			9606	BTO:0000793								28341201	YES		miannu	KU-55933 blocked phosphorylation of ATM in H2O2 and Dox models of cell damage. the neuroprotective efficacy of KU-55933, a potent inhibitor of ATM, against cell damage evoked by oxidative stress (hydrogen peroxide, H2O2) has been studied in human neuroblastoma SH-SY5Y cells and compared with the efficacy of this agent in models of doxorubicin (Dox)- and staurosporine (St)-evoked cell death.	0.8	SIGNOR-262536
NOTCH1	protein	P46531	UNIPROT	MYC	protein	P01106	UNIPROT	up-regulates quantity by expression	transcriptional regulation			9606	BTO:0000782;BTO:0001271;BTO:0000785								16847353	NO		gcesareni	We identified c-myc as a direct target of notch1	0.622	SIGNOR-147944
GSK3B	protein	P49841	UNIPROT	CHEK1	protein	O14757	UNIPROT	down-regulates activity				10090									24260231	NO		miannu	Involvement of GSK3 Inhibition by the PI3K/Akt Pathway in Regulation of Etoposide-induced Chk1 Activation. GSK3ß regulates etoposide-induced Chk1 activation. GSK3 inhibitors, including LiCl and SB216763, restored the sustained Chk1 activation and mitigated apoptosis in cells treated with etoposide and the inhibitors for aberrant kinases, PI3K, or Akt. Thus, proteasomal degradation of Chk1 as well…	0.298	SIGNOR-263050
ERK1/2	proteinfamily	SIGNOR-PF1	SIGNOR	BCL2	protein	P10415	UNIPROT	up-regulates quantity by stabilization	phosphorylation	Thr74	ARTSPLQtPAAPGAA	9606	BTO:0000567								10669763	YES		lperfetto	The results of this study reveal the following novel findings: destruction of the three putative MAP kinase sites at positions 56, 74, and 87 results in ubiquitination and subsequent degradation of the protein. Progressive inactivation of these MAP kinase sites revealed that Bcl-2 stability is mainly regulated by phosphorylation at Thr74 and Ser87, with Ser87 phosphorylation playing a predominant…	0.2	SIGNOR-244494
Selinexor	chemical	CID:71481097	PUBCHEM	XPO1	protein	O14980	UNIPROT	down-regulates activity	chemical inhibition			9606									30510142	YES		miannu	Selinexor (KPT-330) is a first-in-class selective inhibitor of nuclear export (C17H11F6N7O; see ref. 4; for its chemical structure). The drug binds and inhibits exportin XPO-1 that mediates nuclear export of proteins and mRNAs.	0.8	SIGNOR-262537
MTOR	protein	P42345	UNIPROT	RPS6KB1	protein	P23443	UNIPROT	up-regulates activity	phosphorylation	Ser394	TRQTPVDsPDDSTLS	9823		BTO:0004712							23486913	YES		lperfetto	Collectively, these results indicate that Arg, Leu, and Gln act coordinately to stimulate proliferation of pTr cells through activation of the MTOR-RPS6K-RPS6-EIF4EBP1 signal transduction pathway	0.961	SIGNOR-201530
AKT	proteinfamily	SIGNOR-PF24	SIGNOR	BRAF	protein	P15056	UNIPROT	down-regulates	phosphorylation	Thr440	EDRNRMKtLGRRDSS	9606									10869359	YES		lperfetto	We show that phosphorylation of b-raf by akt occurs at multiple residues within its amino terminal regulatory domain, at both the conserved and unique phosphorylation sites. Akt phosphorylated b-raf on s364 and s428 to inactivate its kinase activity b-raf contains three akt consensus sites, table i. One site, ser364 is conserved with c-raf;however, two sites, ser428 and thr439, are unique to b-raf	0.2	SIGNOR-244156
IKBKB	protein	O14920	UNIPROT	FOXO	proteinfamily	SIGNOR-PF27	SIGNOR	down-regulates	phosphorylation	Ser644	GLDFNFDsLISTQNV	9606	BTO:0000150;BTO:0001130;BTO:0001271;BTO:0000527								19188143	YES		gcesareni	Ikkbeta phosphorylates foxo3a at ser644. Ikappab kinase (ikk) physically interacts with, phosphorylates, and inhibits foxo3a independent of akt and causes proteolysis of foxo3a via the ub-dependent proteasome pathway	0.71	SIGNOR-252947
quizartinib	chemical	CHEBI:90217	ChEBI	FLT3	protein	P36888	UNIPROT	down-regulates activity	chemical inhibition			-1									19754199	YES			Compound 7 (AC220) (quizartinib) was identified from this series to be the most potent and selective FLT3 inhibitor with good pharmaceutical properties, excellent PK profile, and superior efficacy and tolerability in tumor xenograft models.	0.8	SIGNOR-255666
PKM	protein	P14618	UNIPROT	STAT3	protein	P40763	UNIPROT	up-regulates	phosphorylation	Tyr705	DPGSAAPyLKTKFIC	9606									22306293	YES		llicata	Pkm2 activates transcription of mek5 by phosphorylating stat3 at y705. pkm2 regulates mek5 transcription via activation of stat3	0.401	SIGNOR-195766
AKT	proteinfamily	SIGNOR-PF24	SIGNOR	CREB1	protein	P16220	UNIPROT	up-regulates activity	phosphorylation	Ser119	EILSRRPsYRKILND	9606									9829964	YES			The nuclear factor CREB stimulates the expression of cellular genes following its protein kinase A-mediated phosphorylation at Ser-133. Ser-133 phosphorylation, in turn, activates target gene expression by promoting recruitment of the co-activator CBP. |When overexpressed in serum-stimulated cells, Akt/PKB potently induced Ser-133 phosphorylation of CREB and promoted recruitment of CBP.	0.2	SIGNOR-251474
CHEK1	protein	O14757	UNIPROT	RB1	protein	P06400	UNIPROT	up-regulates activity	phosphorylation	Ser612	MYLSPVRsPKKKGST	9606									17380128	YES		llicata	These results suggest that ser612 is phosphorylated by chk1/2 after dna damage, leading to the formation of prb-e2f-1. phosphorylation of prb at ser612 enhanced the formation of a complex between prb and e2f-1	0.421	SIGNOR-153904
AKT	proteinfamily	SIGNOR-PF24	SIGNOR	FOXO	proteinfamily	SIGNOR-PF27	SIGNOR	down-regulates activity	phosphorylation	Ser315	DFRSRTNsNASTVSG	9606	BTO:0000150;BTO:0001130;BTO:0001271;BTO:0000527								19188143	YES		lperfetto	Akt-dependent phosphorylation of foxo3a (thr32, ser253, and ser315 for human foxo3) enhances foxo3a/14?3?3 Interaction and promotes foxo3a nuclear export to the cytoplasm, resulting in the repression of foxo3a transcriptional function	0.901	SIGNOR-252827
MAPK14	protein	Q16539	UNIPROT	GSK3B	protein	P49841	UNIPROT	down-regulates	phosphorylation	Ser389	ARIQAAAsTPTNATA	9606		BTO:0000142							18451303	YES		gcesareni	Here, we show that p38 mitogen-activated protein kinase (mapk) also inactivates gsk3beta by direct phosphorylation at its c terminus, and this inactivation can lead to an accumulation of beta-catenin.	0.291	SIGNOR-178603
MTOR	protein	P42345	UNIPROT	STAT3	protein	P40763	UNIPROT	up-regulates	phosphorylation	Ser727	NTIDLPMsPRTLDSL	9606	BTO:0000527								16740698	YES		miannu	Serine phosphorylation and maximal activation of stat3 during cntf signaling is mediated by the rapamycin target mtor. / a stat3 peptide was efficiently phosphorylated on ser727 in a cntf-dependent manner by mtor	0.72	SIGNOR-146915
ERK1/2	proteinfamily	SIGNOR-PF1	SIGNOR	AP1	complex	SIGNOR-C154	SIGNOR	up-regulates	phosphorylation	Thr325	TELEPLCtPVVTCTP	9606									12972619	YES		lperfetto	In a previous study we have observed that exposure of nih 3t3 cells to pdgf or serum leads to c-fos phosphorylation by erk on specific residues, thr232, thr325, thr331, and ser374, within the cooh-terminal c-fos tad we have recently shown that erk phosphorylates multiple residues within the carboxylterminal transactivation domain (tad) of c-fos, thus resulting in its increased transcriptional act…	0.766	SIGNOR-252357
IKBKB	protein	O14920	UNIPROT	NFKBIA	protein	P25963	UNIPROT	down-regulates quantity by destabilization	phosphorylation	Ser32	LLDDRHDsGLDSMKD										11815618	YES		lperfetto	Nuclear factor-kappaB activation depends on phosphorylation and degradation of its inhibitor protein, IkapapB. The phosphorylation of I_Balpha on Ser32 and Ser36 is initiated by an IkapapB kinase (IKK) complex that includes a catalytic heterodimer composed of I_B kinase 1 (IKK-1) and IkapapB kinase 2 (IKK-2) as well as a regulatory adaptor subunit, NF-kappaB essential modulator.	0.923	SIGNOR-249365
DNA_damage	stimulus	SIGNOR-ST1	SIGNOR	ATM	protein	Q13315	UNIPROT	up-regulates				9606									21034966	NO		lperfetto	the ATM-Chk2 and ATR-Chk1 pathways, which are activated by DNA double-strand breaks (DSBs) and single-stranded DNA respectively.	0.7	SIGNOR-242612
ATR	protein	Q13535	UNIPROT	MDM2	protein	Q00987	UNIPROT	down-regulates activity	phosphorylation	Ser407	SSSIIYSsQEDVKEF	9606	BTO:0002552								14654783	YES		lperfetto	We found that a major kinase responsible for s407 phosphorylation is atrs407 phosphorylation of mdm2 by atr reduces mdm2-dependent export of p53 from nuclei to cytoplasm.	0.493	SIGNOR-119546
CEBPB	protein	P17676	UNIPROT	S100A9	protein	P06702	UNIPROT	up-regulates quantity by expression	transcriptional regulation			9606	BTO:0001370								9706399	YES			Among several known transcription factor binding motifs, nuclear protein(s) of VD3-treated HL-60 cells and THP-1 cells bound to the CCAAT/enhancer binding protein (C/EBP)-binding motif that was located in the upstream region of the MRP14 gene (-81), as evidenced by the competitive gel mobility-shift assay.|Thus, it was concluded that C/EBP alpha and -beta were able to bind to the C/EBP motif, and…	0.2	SIGNOR-254044
AP1	complex	SIGNOR-C154	SIGNOR	Proliferation	phenotype	SIGNOR-PH4	SIGNOR	up-regulates				9606									9878062	NO		lperfetto	AP‐1 proteins, including c‐Fos and c‐Jun, are prominent nuclear targets of growth factor induced signaling, making AP‐1 a candidate nuclear effector of growth factor induced proliferation.	0.7	SIGNOR-252356
PDPK1	protein	O15530	UNIPROT	AKT	proteinfamily	SIGNOR-PF24	SIGNOR	up-regulates activity	phosphorylation	Thr308	KDGATMKtFCGTPEY	10116		BTO:0000142							10226025	YES		lperfetto	Protein kinase B (PKB) is activated by phosphorylation of Thr308 and of Ser473. Thr308 is phosphorylated by the 3-phosphoinositide-dependent protein kinase-1 (PDK1) but the identity of the kinase that phosphorylates Ser473 (provisionally termed PDK2) is unknown.	0.788	SIGNOR-244421
CREB1	protein	P16220	UNIPROT	CTNNB1	protein	P35222	UNIPROT	up-regulates quantity by expression	transcriptional regulation			8355									10775268	NO		lperfetto	Here we demonstrate that the closely related acetyltransferases p300 and cbp potentiate beta-catenin-mediated activation of the siamois promoter	0.453	SIGNOR-76984
AKT	proteinfamily	SIGNOR-PF24	SIGNOR	FOXO	proteinfamily	SIGNOR-PF27	SIGNOR	down-regulates	phosphorylation	Ser197	APRRRAAsMDSSSKL	9606									16272144	YES		lperfetto	Foxo4 transcription factor, also referred to afx, contains three putative phosphorylation motif sites for protein kinase b (pkb), thr32, ser197, and ser262, and it is proposed that phosphorylated foxo4 stays in the cytosol and is imported to the nucleus through dephosphorylation to induce target gene expression	0.901	SIGNOR-252828
AKT	proteinfamily	SIGNOR-PF24	SIGNOR	FOXO	proteinfamily	SIGNOR-PF27	SIGNOR	down-regulates	phosphorylation	Ser256	SPRRRAAsMDNNSKF	-1	BTO:0000318								10377430	YES		lperfetto	Here we show that the activation of phosphatidylinositol 3 (PI3) kinase by extracellular growth factors induces phosphorylation, nuclear export, and transcriptional inactivation of FKHR1, a member of the FKHR subclass of the forkhead family of transcription factors. Protein kinase B (PKB)/Akt, a key mediator of PI3 kinase signal transduction, phosphorylated recombinant FKHR1 in vitro at threonine…	0.901	SIGNOR-252831
3',5'-cyclic AMP	smallmolecule	CHEBI:17489	ChEBI	PKA	proteinfamily	SIGNOR-PF17	SIGNOR	up-regulates activity	chemical activation			9606									26687711	YES			Inactive PKA exists as a holoenzyme, comprised of two regulatory (R) subunits and two catalytic subunits . In the presence of cAMP, the holoenzyme becomes active by binding two cAMP molecules cooperatively to each R subunit, resulting in a conformational change in the R subunits, thus releasing the two C subunits to phosphorylate downstream targets	0.8	SIGNOR-258763
CREB1	protein	P16220	UNIPROT	BCL2	protein	P10415	UNIPROT	up-regulates quantity by expression	transcriptional regulation			9606	BTO:0000776;BTO:0003076								8816467	NO		lperfetto	Induction of bcl-2 expression by phosphorylated CREB proteins during B-cell activation and rescue from apoptosis	0.442	SIGNOR-43927
FLT3	protein	P36888	UNIPROT	PTPN11	protein	Q06124	UNIPROT	up-regulates activity	binding			10090	BTO:0002882				phosphorylation:Tyr599	VDFREYEyDLKWEFP			16684964	YES		gcesareni	Y599 was additionally found to interact with the protein tyrosine phosphatase SHP2 in a phosphorylation-dependent manner. As Y599F-Flt3-32D was unable to associate with and to phosphorylate SHP2 and since silencing of SHP2 in WT-Flt3-expressing cells mimicked the Y599F-Flt3 phenotype, we hypothesize that recruitment of SHP2 to pY599 contributes to FL-mediated Erk activation and proliferation.	0.516	SIGNOR-245057
BRAF	protein	P15056	UNIPROT	MEK1/2	proteinfamily	SIGNOR-PF25	SIGNOR	up-regulates activity	phosphorylation			9606									21900390	YES		miannu	BRAFV600E has been shown to initiate thyroid follicular cell transformation. The BRAFV600E mutation disrupts the hydrophobic interaction, enabling the BRAF kinase to fold into a catalytically active formation, resulting in an almost 500-fold increase in kinase activity. Mutant BRAF can dimerize and activate MEK without Ras activation.	0.822	SIGNOR-251988
BRAF	protein	P15056	UNIPROT	MEK1/2	proteinfamily	SIGNOR-PF25	SIGNOR	up-regulates	phosphorylation			9606									8668348	YES		lperfetto	We show that, consequently, b-raf interacts with mek-1 and mek-2 with a better affinity than does c-raf-1, thus strengthening the notion that b-raf is a stronger mek activator than c-raf-l.	0.822	SIGNOR-244843
CREB1	protein	P16220	UNIPROT	FOXO	proteinfamily	SIGNOR-PF27	SIGNOR	down-regulates activity	binding			9606									15126506	YES		lperfetto	We provide evidence that the acetyltransferase creb-binding protein (cbp) binds foxo resulting in acetylation of foxo. This acetylation inhibits foxo transcriptional activity	0.489	SIGNOR-252894
PDPK1	protein	O15530	UNIPROT	AKT	proteinfamily	SIGNOR-PF24	SIGNOR	up-regulates activity	phosphorylation	Thr308	KDGATMKtFCGTPEY	10090									12808134	YES		lperfetto	Akt1 and akt2 are phosphorylated and activated by the protein kinase pdk1 at thr-308 or thr-309, respectively, in the activation t-loop, and further activation occurs through phosphorylation at ser-473 or ser-474, respectively. In this paper, we demonstrate that this is indeed the case, and report the purification and initial characterization of a 3 phosphoinositide-dependent protein kinase, pdk1…	0.788	SIGNOR-134477
AKT	proteinfamily	SIGNOR-PF24	SIGNOR	FOXO	proteinfamily	SIGNOR-PF27	SIGNOR	down-regulates	phosphorylation			9606									21620960	YES		gcesareni	Akt phosphorylates members of the foxo factors (forkhead family of transcription factors), leading to binding of 14-3-3 proteins and cytoplasmic localisation. In particular, akt phosphorylates foxo1 on thr24, ser256 and ser319. Foxo 3alfa and foxo4 are phosphorylated on equivalent sites. In addition, phosphorylation of afx by protein kinase b inhibits its transcriptional activity.	0.901	SIGNOR-252824
AKT	proteinfamily	SIGNOR-PF24	SIGNOR	FOXO	proteinfamily	SIGNOR-PF27	SIGNOR	down-regulates	phosphorylation	Ser319	TFRPRTSsNASTISG	9606									11237865	YES		lperfetto	The transcription factor, forkhead in rhabdomyosarcoma (fkhr), is phosphorylated at three amino acid residues (thr-24, ser-256 and ser-319) by protein kinase b (pkb)alpha.Fkhr (forkhead in rhabdomyosarcoma), afx (all1 fused gene from chromosome x) and fkhrl1 (fkhr-like 1) are phosphorylated directly by pkb in cells, preventing them from stimulating gene transcription and leading to their exit fro…	0.901	SIGNOR-252835
AKT	proteinfamily	SIGNOR-PF24	SIGNOR	FOXO	proteinfamily	SIGNOR-PF27	SIGNOR	down-regulates quantity by destabilization	phosphorylation			9606									21440011	YES		lperfetto	Phosphorylation of FoxOs by Akt inhibits transcriptional functions of FoxOs and contributes to cell survival, growth and proliferation.The PI3K/Akt signaling regulates cell proliferation and survival in part by phosphorylating FoxOs to promote their interaction with 14-3-3 protein that results in nuclear exclusion and eventual ubiquitin proteasome pathway (UPP)-dependent degradation of FoxOs	0.901	SIGNOR-252833
AKT	proteinfamily	SIGNOR-PF24	SIGNOR	FOXO	proteinfamily	SIGNOR-PF27	SIGNOR	down-regulates	relocalization			10090	BTO:0002572								18423396	YES		lperfetto	Akt1/PKBalpha was found to be the major regulator of phosphorylation and nuclear export of FoxO1, whose presence in the nucleus strongly attenuates adipocyte differentiation	0.901	SIGNOR-252837
AKT	proteinfamily	SIGNOR-PF24	SIGNOR	FOXO	proteinfamily	SIGNOR-PF27	SIGNOR	down-regulates	phosphorylation	Thr32	QSRPRSCtWPLPRPE	9606									16272144	YES		lperfetto	Foxo4 transcription factor, also referred to afx, contains three putative phosphorylation motif sites for protein kinase b (pkb), thr32, ser197, and ser262, and it is proposed that phosphorylated foxo4 stays in the cytosol and is imported to the nucleus through dephosphorylation to induce target gene expression	0.901	SIGNOR-252830
GSK3B	protein	P49841	UNIPROT	NfKb-p65/p50	complex	SIGNOR-C13	SIGNOR	up-regulates	phosphorylation			9606	BTO:0000782								16407239	YES		lperfetto	Rela is phosphorylated at: ser276 by the catalytic subunit of protein kinase a (pkac), msk1 and msk2; at ser311 by the atypical pkczeta; at ser468 by ikkbeta, ikkepsilon and glycogen-synthase kinase-3beta (gsk3beta); at ser529 by ck2; and at ser536 by ikkbeta, ikkalfa, ikkepsilon, nf-kb activating kinase (nak, also known as tank-binding kinase-1 tbk1)) and rsk1 (also known as p90 ribosomal protei…	0.382	SIGNOR-217430
MAPK14	protein	Q16539	UNIPROT	MEK1/2	proteinfamily	SIGNOR-PF25	SIGNOR	down-regulates activity				9606	BTO:0001255								12839928	NO		miannu	Activation of p38 MAPK is required for arsenite-induced apoptosis and MEK1,2 dephosphorylation in human skin fibroblasts. Our data suggest the presence of a continuous negative feedback from p38α and p38β to MEK1,2 as simultaneous inhibition of p38α and p38β isoforms in normal quiescent cells resulted in accumulation of phosphorylated MEK1,2 (Fig. 2A) ⇓ . This negative regulation of MEK1,2 in nor…	0.692	SIGNOR-263511
CHEK2	protein	O96017	UNIPROT	TP53	protein	P04637	UNIPROT	up-regulates quantity by stabilization	phosphorylation	Thr18	EPPLSQEtFSDLWKL	9606									10710310	YES		gcesareni	Chk1/chk2 and atm/atr also phosphorylate the effector p53, increasing its stability.We Have demonstrated that the human homologs of the checkpoint kinases, chk1 and chk2/hcds1, phosphorylate at least three dna damage-inducible phosphorylation sites in p53.	0.756	SIGNOR-75645
GSK3B	protein	P49841	UNIPROT	CREB1	protein	P16220	UNIPROT	up-regulates activity	phosphorylation	Ser129	QKRREILsRRPSYRK	10116									12162494	YES			GSK-3 can phosphorylate CREB at S129 Transactivation of CREB is significantly reduced (p ≤ 0.05) by 86% for the S129A mutant	0.671	SIGNOR-251233
PIP3	smallmolecule	CHEBI:16618	ChEBI	PDPK1	protein	O15530	UNIPROT	up-regulates activity	relocalization			9606									21798082	YES		lperfetto	Pip3 acts in turn as a docking site for two kinases, phosphoinositide-dependent kinase 1 (PDK1) and AKT, and the subsequent phosphorylation of AKT at serine 308 by PDK1, leading to AKT activation.	0.8	SIGNOR-175253
ATR	protein	Q13535	UNIPROT	TP53	protein	P04637	UNIPROT	up-regulates quantity by stabilization	phosphorylation	Ser15	PSVEPPLsQETFSDL	9606									11865061	YES		gcesareni	Nhibition of atr kinase activity substantially reduces hypoxia-induced phosphorylation of p53 protein on serine 15 as well as p53 protein accumulation.	0.734	SIGNOR-115134
JNK	proteinfamily	SIGNOR-PF15	SIGNOR	AP1	complex	SIGNOR-C154	SIGNOR	up-regulates activity	binding			9606									24315690	YES		miannu	In addition to the possible regulation of the transcription factor c-Jun by phosphorylation via the c-Jun N-terminal kinase (JNK) or the kinases ERK1, ERK2 and GSK3β, further signaling pathways lead to an up-regulation of c-Jun protein and thus AP-1 activity	0.793	SIGNOR-253340
RB1	protein	P06400	UNIPROT	Proliferation	phenotype	SIGNOR-PH4	SIGNOR	down-regulates				9606									21524151	NO		miannu	Consistent with this, the magnitude of the response (i.e. the fraction of cells undergoing arrest) appears to diminish the closer the cells are to the time of S-phase entry. The existence of a time gap between full pRb phosphorylation and S-phase entry is also consistent with the notion that E2F, once released from pRb, transcriptionally activates factors needed for S-phase entry, a process which…	0.7	SIGNOR-262533
AKT	proteinfamily	SIGNOR-PF24	SIGNOR	BRAF	protein	P15056	UNIPROT	down-regulates	phosphorylation	Ser364	FGQRDRSsSAPNVHI	9606									10869359	YES		lperfetto	We show that phosphorylation of b-raf by akt occurs at multiple residues within its amino terminal regulatory domain, at both the conserved and unique phosphorylation sites. Akt phosphorylated b-raf on s364 and s428 to inactivate its kinase activity b-raf contains three akt consensus sites, table i. One site, ser364 is conserved with c-raf;however, two sites, ser428 and thr439, are unique to b-raf	0.2	SIGNOR-244152
PKA	proteinfamily	SIGNOR-PF17	SIGNOR	CREB1	protein	P16220	UNIPROT	up-regulates activity	phosphorylation	Ser119	EILSRRPsYRKILND	9606									8386317	YES		miannu	CREB is phosphorylated on Ser133 by PKA (protein kinase A), promoting the recruitment of the co-activator proteins CBP (CREB-binding protein) and p300; this has been proposed to increase the transcription of CREB-dependent genes.	0.2	SIGNOR-263653
MTOR	protein	P42345	UNIPROT	Proliferation	phenotype	SIGNOR-PH4	SIGNOR	up-regulates				9606		BTO:0000007							20508131	NO			The mammalian target of rapamycin complex 1 (mTORC1) integrates mitogen and nutrient signals to control cell proliferation and cell size.	0.7	SIGNOR-255944
CHEK2	protein	O96017	UNIPROT	TP53	protein	P04637	UNIPROT	up-regulates quantity by stabilization	phosphorylation	Ser15	PSVEPPLsQETFSDL	9606									10710310	YES		gcesareni	Chk1/chk2 and atm/atr also phosphorylate the effector p53, increasing its stability.We Have demonstrated that the human homologs of the checkpoint kinases, chk1 and chk2/hcds1, phosphorylate at least three dna damage-inducible phosphorylation sites in p53.	0.756	SIGNOR-75629
ERK1/2	proteinfamily	SIGNOR-PF1	SIGNOR	GSK3B	protein	P49841	UNIPROT	down-regulates activity	phosphorylation	Ser9	SGRPRTTsFAESCKP	10090	BTO:0002572								28646232	YES		Gianni	We demonstrate that insulin-mediated activation of ERK1/2 results in phosphorylation of GSK3β at S9 independently of Akt/mTORC1 activity in Tsc2 null mouse embryonic fibroblasts. In addition, we show that inhibition of ERK1/2 rescues GSK3β activity and restores protein synthesis in Tsc2 −/− MEFs to normal levels	0.2	SIGNOR-262522
STAT5A	protein	P42229	UNIPROT	Proliferation	phenotype	SIGNOR-PH4	SIGNOR	up-regulates				9606	BTO:0004408								15353555	NO		miannu	Here we report that a persistent activation of STAT5A in human CD34+ cells results in enhanced self-renewal. STAT5A drives the expression of a number of proto-oncogenes and cytokines in human CD34+ cells, as well as a number of erythroid-specific genes, favoring erythroid over myeloid differentiation and providing a long-term proliferative advantage for erythroid progenitors.	0.7	SIGNOR-255682
ATM	protein	Q13315	UNIPROT	TP53	protein	P04637	UNIPROT	up-regulates quantity by stabilization	phosphorylation	Ser20	PLSQETFsDLWKLLP	9606	BTO:0002552								17967874	YES		gcesareni	The increased interaction between B56gamma and p53 after DNA damage requires ATM-dependent phosphorylation of p53 at Ser15.	0.819	SIGNOR-158636
CHEK2	protein	O96017	UNIPROT	TP53	protein	P04637	UNIPROT	up-regulates quantity by stabilization	phosphorylation	Ser15	PSVEPPLsQETFSDL	9606	BTO:0000567								10673501	YES		gcesareni	Chk1/chk2 and atm/atr also phosphorylate the effector p53, increasing its stability.We Have demonstrated that the human homologs of the checkpoint kinases, chk1 and chk2/hcds1, phosphorylate at least three dna damage-inducible phosphorylation sites in p53.	0.756	SIGNOR-75009
CHEK2	protein	O96017	UNIPROT	TP53	protein	P04637	UNIPROT	up-regulates quantity by stabilization	phosphorylation	Ser378	SKKGQSTsRHKKLMF	9606									10710310	YES		gcesareni	Chk1/chk2 and atm/atr also phosphorylate the effector p53, increasing its stability.We Have demonstrated that the human homologs of the checkpoint kinases, chk1 and chk2/hcds1, phosphorylate at least three dna damage-inducible phosphorylation sites in p53.	0.756	SIGNOR-75641
LY2603618	chemical	CID:11955855	PUBCHEM	CHEK1	protein	O14757	UNIPROT	down-regulates activity	chemical inhibition			9606									33261142	YES		miannu	Here, using a panel of basal-like cancer cell lines, we explored the synergistic interactions of CHK1 inhibitors (rabusertib and SAR020106) with approved therapies in breast cancer and evaluated their potential to overcome resistance.	0.8	SIGNOR-262538
RPS6KA1	protein	Q15418	UNIPROT	STK11	protein	Q15831	UNIPROT	down-regulates activity	phosphorylation	Ser428	SSKIRRLsACKQQ	9606	BTO:0001271								25846811	YES		lperfetto	Negative regulation of the LKB1/AMPK pathway by ERK in human acute myeloid leukemia cellsBRAFV600E activates downstream molecules, including ERK and p90 ribosomal S6 kinase (RSK), and leads to the phosphorylation of LKB-1 at Ser428 by these kinases. This cascade results in the dissociation of LKB1 from AMPK.	0.273	SIGNOR-209871
SB 203580	chemical	CHEBI:90705	ChEBI	MAPK14	protein	Q16539	UNIPROT	down-regulates	chemical inhibition			9606	BTO:0000567								10702313	YES		gcesareni	Pretreatment of hela cells with sb 203580, a pyridinyl imidazole compound that specifically inhibits p38 mitogen-activated protein kinase (mapk). It has previously been established that sb 203580 acts primarily to block the catalytic activity of p38 mapk. However, it has been suggested that in cells, the compounds could also inhibit p38 mapk activation by virtue of their ability to bind to the in…	0.8	SIGNOR-75389
PIM1	protein	P11309	UNIPROT	MDM2	protein	Q00987	UNIPROT	up-regulates quantity by stabilization	phosphorylation	Ser166	SSRRRAIsETEENSD	9606									18467333	YES		gcesareni	Additionally, the pim kinases phosphorylate mdm2 in vitro and in cultured cells at ser166 and ser186, two previously identified targets of other signaling pathways, including akt.	0.397	SIGNOR-178615
wortmannin	chemical	CHEBI:52289	ChEBI	PI3K	complex	SIGNOR-C156	SIGNOR	down-regulates	chemical inhibition			9606									8162590	YES		gcesareni	The microbial product wortmannin and some of its analogues have been shown to be potent inhibitors of phosphatidylinositol-3-kinase.	0.8	SIGNOR-252666
ATM	protein	Q13315	UNIPROT	TP53	protein	P04637	UNIPROT	up-regulates quantity by stabilization	phosphorylation	Ser46	AMDDLMLsPDDIEQW	9606									11875057	YES		gcesareni	In response to ionizing radiation (ir), atm, the gene product mutated in ataxia telangiectasia, stabilizes and activates p53 through phosphorylation of ser15 and (indirectly) ser20. Here we show that phosphorylation of p53 on ser46, a residue important for p53 apoptotic activity, as well as on ser9, in response to ir also is dependent on the atm protein kinase. one pathway involves the phosphoryl…	0.819	SIGNOR-115344
AKT	proteinfamily	SIGNOR-PF24	SIGNOR	FOXO	proteinfamily	SIGNOR-PF27	SIGNOR	down-regulates activity	phosphorylation	Ser253	APRRRAVsMDNSNKY	9606	BTO:0000150;BTO:0001130;BTO:0001271;BTO:0000527								19188143	YES		lperfetto	Akt-dependent phosphorylation of foxo3a (thr32, ser253, and ser315 for human foxo3) enhances foxo3a/14?3?3 Interaction and promotes foxo3a nuclear export to the cytoplasm, resulting in the repression of foxo3a transcriptional function	0.901	SIGNOR-252826
CHEK2	protein	O96017	UNIPROT	TP53	protein	P04637	UNIPROT	up-regulates quantity by stabilization	phosphorylation	Ser378	SKKGQSTsRHKKLMF	9606	BTO:0000776								17339337	YES		gcesareni	Chk1/chk2 and atm/atr also phosphorylate the effector p53, increasing its stability.We Have demonstrated that the human homologs of the checkpoint kinases, chk1 and chk2/hcds1, phosphorylate at least three dna damage-inducible phosphorylation sites in p53.	0.756	SIGNOR-153479
FLT3	protein	P36888	UNIPROT	GRB10	protein	Q13322	UNIPROT	up-regulates activity	binding			10090	BTO:0001516								23246379	YES			These results suggest that Grb10 binds to both normal and oncogenic FLT3 and induces PI3K–Akt and STAT5 signaling pathways resulting in an enhanced proliferation, survival and colony formation of hematopoietic cells.	0.381	SIGNOR-255947
3-(9-Fluoro-2-(piperidine-1-carbonyl)-1,2,3,4-tetrahydro-[1,4]diazepino[6,7,1-hi]indol-7-yl)-4-(imidazo[1,2-a]pyridin-3-yl)-1H-pyrrole-2,5-dione	chemical	CID:10029385	PUBCHEM	GSK3B	protein	P49841	UNIPROT	down-regulates activity	chemical inhibition			9606	BTO:0000183								31562256	YES		miannu	Indeed, we demonstrated that the selective GSK3 inhibitor LY2090314 significantly reduced cell proliferation in control pancreatic cancer cell lines	0.8	SIGNOR-262539
TLR4	protein	O00206	UNIPROT	MAPK14	protein	Q16539	UNIPROT	up-regulates activity	phosphorylation			9606									28137827	YES		miannu	Binding of S100A9 to TLR4 stimulates the phosphorylation of JNK, ERK1/2, and p38 MAPK, which leads to the activation of c-Jun, CREB, and NF-κB. Activation of neutrophils by S100A9 also proceeds via p38 MAPK, JNK, and ERK1/2 phosphorylation.	0.383	SIGNOR-263652
AKT	proteinfamily	SIGNOR-PF24	SIGNOR	MDM2	protein	Q00987	UNIPROT	up-regulates activity	phosphorylation	Ser166	SSRRRAIsETEENSD	9606									15169778	YES		lperfetto	Stabilization of mdm2 via decreased ubiquitination is mediated by protein kinase b/akt-dependent phosphorylation.	0.2	SIGNOR-244296
AKT	proteinfamily	SIGNOR-PF24	SIGNOR	FOXO	proteinfamily	SIGNOR-PF27	SIGNOR	down-regulates	phosphorylation			9606									18394876	YES		lperfetto	The phosphorylation of the two remaining akt-dependent sites inhibits foxo6 transcriptional activity	0.901	SIGNOR-252834
mTORC2	complex	SIGNOR-C2	SIGNOR	MYC	protein	P01106	UNIPROT	up-regulates				9606									24856037	NO		miannu	MTORC1 and mTORC2 converge on c-Myc to control metabolic reprogramming in cancer. mTORC1 and mTORC2 conspire to link growth factor receptor–PI3K signaling with c-Myc-dependent metabolic reprogramming by controlling both c-Myc levels and activity	0.328	SIGNOR-256171
BCL2	protein	P10415	UNIPROT	Apoptosis	phenotype	SIGNOR-PH2	SIGNOR	down-regulates				9606									1286168	NO		lperfetto	Bcl-2 functions to inhibit apoptosis in a variety of in vitro and in vivo experiments, suggesting interference with a central mechanism of apoptosis	0.7	SIGNOR-249611
ATM	protein	Q13315	UNIPROT	CREB1	protein	P16220	UNIPROT	down-regulates activity	phosphorylation	Ser97	TIAESEDsQESVDSV	9606									15073328	YES		lperfetto	Individual ala substitutions at thr-100, ser-111, or ser-121 inhibited atm-catalyzed phosphate incorporationatm phosphorylated creb in vitro and in vivophosphorylation of creb correlated with a decrease in creb transactivation potential and reduced interaction between creb and its transcriptional coactivator, creb-binding protein (cbp)	0.508	SIGNOR-124043
ATM	protein	Q13315	UNIPROT	CREB1	protein	P16220	UNIPROT	down-regulates	phosphorylation	Ser107	SVDSVTDsQKRREIL	9606									15073328	YES		lperfetto	Atm phosphorylated creb in vitro and in vivo in response to ionizing radiation (ir) and h(2)o(2) on a stress-inducible domain. Ir-induced phosphorylation of creb correlated with a decrease in creb transactivation potential and reduced interaction between creb and its transcriptional coactivator, creb-binding protein (cbp). A creb mutant containing ala substitutions at atm phosphorylation sites di…	0.508	SIGNOR-124047
CHEK2	protein	O96017	UNIPROT	TP53	protein	P04637	UNIPROT	up-regulates quantity by stabilization	phosphorylation	Ser378	SKKGQSTsRHKKLMF	9606	BTO:0001321								15659650	YES		lperfetto	The cell cycle checkpoint kinases CHK1 and CHK2 have been shown to phosphorylate multiple sites in the N-terminal domain of p53, consequently leading to p53 stabilization and activation. Phosphorylation of at least three of these sites, Ser366, Ser378, and Thr387, was induced by DNA damage.	0.756	SIGNOR-74835
XPO1	protein	O14980	UNIPROT	TP53	protein	P04637	UNIPROT	down-regulates activity	relocalization			9606									17891139	YES		miannu	We identify the major poly(ADP-ribosyl)ated sites of p53 by PARP-1 and find that PARP-1-mediated poly(ADP-ribosyl)ation blocks the interaction between p53 and the nuclear export receptor Crm1, resulting in nuclear accumulation of p53. These findings molecularly link PARP-1 and p53 in the DNA-damage response, providing the mechanism for how p53 accumulates in the nucleus in response to DNA damage.…	0.53	SIGNOR-260067
mTORC2	complex	SIGNOR-C2	SIGNOR	AKT	proteinfamily	SIGNOR-PF24	SIGNOR	up-regulates activity	phosphorylation	Ser473	RPHFPQFsYSASGTA	9606	BTO:0000182;BTO:0000018								15718470	YES		lperfetto	The rictor-mtor complex directly phosphorylated akt/pkb on ser473 in vitro and facilitated thr308 phosphorylation by pdk1	0.617	SIGNOR-217008
ATM	protein	Q13315	UNIPROT	TP53	protein	P04637	UNIPROT	up-regulates quantity by stabilization	phosphorylation	Ser15	PSVEPPLsQETFSDL	9606									17967874	YES		lperfetto	In this study, we show that the increased interaction between B56gamma and p53 after DNA damage requires ATM-dependent phosphorylation of p53 at Ser15.	0.819	SIGNOR-158632
MTOR	protein	P42345	UNIPROT	AKT	proteinfamily	SIGNOR-PF24	SIGNOR	up-regulates activity	phosphorylation	Ser473	RPHFPQFsYSASGTA	9606	BTO:0000182;BTO:0000018		SIGNOR-C2						15718470	YES		lperfetto	The rictor-mtor complex directly phosphorylated akt/pkb on ser473 in vitro and facilitated thr308 phosphorylation by pdk1	0.924	SIGNOR-134185
FLT3	protein	P36888	UNIPROT	STAT5A	protein	P42229	UNIPROT	up-regulates activity	phosphorylation	Tyr694	LAKAVDGyVKPQIKQ	10090	BTO:0002882								17356133	YES		gcesareni	in vitro kinase assays revealed that STAT5 is a direct target of Flt3	0.569	SIGNOR-245069
PIM1	protein	P11309	UNIPROT	FOXO	proteinfamily	SIGNOR-PF27	SIGNOR	down-regulates	phosphorylation	Ser253	APRRRAVsMDNSNKY	9606									18593906	YES		tpavlidou	Pim-mediated phosphorylation and inactivation of forkhead transcription factors, foxo1a and foxo3a, was involved in the transcriptional repression of the p27(kip1) gene.	0.402	SIGNOR-252966
CHEK2	protein	O96017	UNIPROT	TP53	protein	P04637	UNIPROT	up-regulates quantity by stabilization	phosphorylation	Ser20	PLSQETFsDLWKLLP	9606									10801407	YES		gcesareni	The tumour suppressor protein p53 is stabilised and activated in response to ionising radiation. This is known to depend on the kinase atm;recent results suggest atm acts via the downstream kinase chk2/hcds1, which stabilises p53 at least in part by direct phosphorylation of residue serine 20	0.756	SIGNOR-77144
PI3K	complex	SIGNOR-C156	SIGNOR	PIP3	smallmolecule	CHEBI:16618	ChEBI	up-regulates quantity	chemical modification			9606									12040186	YES		lperfetto	The activated PI3K converts the plasma membrane lipid phosphatidylinositol-4,5-bisphosphate [PI(4,5)P2] to phosphatidylinositol-3,4,5-trisphosphate [PI(3,4,5)P3].	0.8	SIGNOR-252713
PI3K	complex	SIGNOR-C156	SIGNOR	PIP3	smallmolecule	CHEBI:16618	ChEBI	up-regulates quantity	chemical modification			9606									24647478	YES		lperfetto	Stimulation of tyrosine kinase receptors initiates a signaling cascade that activates pi3k. Activated pi3k uses pip2 to generate pip3, 24647478	0.8	SIGNOR-252712
ATM	protein	Q13315	UNIPROT	MDM2	protein	Q00987	UNIPROT	down-regulates activity	phosphorylation	Ser395	SQESEDYsQPSTSSS	9606	BTO:0002552								11331603	YES		lperfetto	Atm phosphorylates mdm2 on s395 in vitro. Moreover, s395 appears to be phosphorylated in an atm-dependent manner in vivo the precise mechanism through which s395 phosphorylation attenuates mdm2 function is unclear.	0.727	SIGNOR-107256
MEK1/2	proteinfamily	SIGNOR-PF25	SIGNOR	ERK1/2	proteinfamily	SIGNOR-PF1	SIGNOR	up-regulates	phosphorylation			9606									11971971	YES		lperfetto	Mapk1 is phosphorylated by map2k1/mek1 and map2k2/mek2 on thr-185 and tyr-187 in response to external stimuli like insulin or ngf. Both phosphorylations are required for activity.	0.781	SIGNOR-244776
FLT3	protein	P36888	UNIPROT	CTNNB1	protein	P35222	UNIPROT	up-regulates activity	phosphorylation			9606	BTO:0001545								17851558	YES		miannu	Endogenous beta-catenin co-immunoprecipitated with endogenous activated FLT3, and recombinant activated FLT3 directly phosphorylated recombinant beta-catenin. Finally, FLT3 inhibitor decreased tyrosine phosphorylation of beta-catenin in leukemia cells obtained from FLT3-ITD-positive AML patients. These data demonstrate that FLT3 activation induces beta-catenin tyrosine phosphorylation and nuclear…	0.378	SIGNOR-260124
GSK3B	protein	P49841	UNIPROT	CTNNB1	protein	P35222	UNIPROT	down-regulates activity	phosphorylation	Ser33	QQQSYLDsGIHSGAT	9606			SIGNOR-C110						23151663	YES		gcesareni	Beta-catenin phosphorylation in vivo is sequentially carried out by two distinct kinases, ckialfa and gsk-3. Ckialfa phosphorylation of s45 proceeds and is required for subsequent gsk-3 phosphorylation of t41, s37, and s33 one key substrate of gsk3 is the transcriptional co-activator beta catenin, whichis inactivated by gsk3 mediated phosphorylation and targeted for proteasomal degradation in uns…	0.844	SIGNOR-199504
STAT5A	protein	P42229	UNIPROT	RAD51	protein	Q06609	UNIPROT	up-regulates quantity by expression	transcriptional regulation			10090									15626738	YES			FLT3-ITD-TKD dual mutants induce hyperactivation of STAT5 and up-regulation of its downstream targets Bcl-x(L) and RAD51 in Ba/F3 cells	0.252	SIGNOR-261552
MDM2	protein	Q00987	UNIPROT	TP53	protein	P04637	UNIPROT	down-regulates quantity by destabilization	ubiquitination			9606									23150757	YES		lperfetto	Dual Roles of MDM2 in the Regulation of p53: Ubiquitination Dependent and Ubiquitination Independent Mechanisms of MDM2 Repression of p53 Activity	0.969	SIGNOR-199371
IKBKB	protein	O14920	UNIPROT	BAD	protein	Q92934	UNIPROT	down-regulates	phosphorylation			9606			SIGNOR-C14						23332762	YES		gcesareni	Ikk phosphorylates bad at serine-26 (ser26) and primes it for inactivation.	0.264	SIGNOR-192614
ATM	protein	Q13315	UNIPROT	TP53	protein	P04637	UNIPROT	up-regulates quantity by stabilization	phosphorylation	Ser15	PSVEPPLsQETFSDL	9606	BTO:0000552								15254178	YES		lperfetto	Deltanp63 transcriptionally regulates atm to control p53 serine-15 phosphorylation. We next aimed to identify novel factors that control damage-induced p53 phosphorylation in a keratinocyte model system, and discovered that the epithelial stem cell marker _Np63_ is a novel ATM regulator that controls p53 Serine-15 phosphorylation through transcription of the ATM kinase.	0.819	SIGNOR-126753
TP53	protein	P04637	UNIPROT	MDM2	protein	Q00987	UNIPROT	up-regulates quantity by expression	transcriptional regulation			10090									7958853	NO		gcesareni	The p53 tumor suppressor protein trans-activates mdm2 itself, which is therefore considered a component of a p53 negative feedback loop.	0.969	SIGNOR-34962
S100A9	protein	P06702	UNIPROT	TLR4	protein	O00206	UNIPROT	up-regulates activity	binding			9606									28137827	YES		miannu	RAGE and TLR4 are well-characterized S100A8 and S100A9 receptors and expressed in AML cells. S100A9 binds to TLR4 and induces signaling pathways,promoting leukemic cell differentiation and proliferation arrest. Binding of S100A9 to TLR4 stimulates the phosphorylation of JNK, ERK1/2, and p38 MAPK, which leads to the activation of c-Jun, CREB, and NF-kB.	0.513	SIGNOR-261918
CREB1	protein	P16220	UNIPROT	CEBPB	protein	P17676	UNIPROT	up-regulates quantity by expression	transcriptional regulation			10090	BTO:0002572								14593102	NO		lperfetto	Expression of constitutively active CREB strongly activated C/EBPbeta promoter-reporter genes, induced expression of endogenous C/EBPbeta, and caused adipogenesis in the absence of the hormonal inducers normally required	0.542	SIGNOR-250573
BAX	protein	Q07812	UNIPROT	Apoptosis	phenotype	SIGNOR-PH2	SIGNOR	up-regulates				9606									23567751	NO		miannu	The mitochondrial pathway of apoptosis proceeds when the outer mitochondrial membrane (OMM) is compromised by the pro-apoptotic BCL-2 family members, BAK and BAX. Once activated, BAK and BAX form proteolipid pores in the OMM leading to mitochondrial outer membrane permeabilization (MOMP), and the release of inner membrane space proteins, such as cytochrome c, which promotes caspase activation.	0.7	SIGNOR-261494
MEK1/2	proteinfamily	SIGNOR-PF25	SIGNOR	GSK3B	protein	P49841	UNIPROT	up-regulates activity	phosphorylation	Tyr216	RGEPNVSyICSRYYR	9606		BTO:0001253							15020233	YES		lperfetto	In vitro kinase assay was carried out using a recombinant human active mek1 and we found that gsk-3beta was phosphorylated on tyr(216) by this kinase in a dose- and time-dependent manner. Further, the pretreatment of fibroblasts with u0126 inhibited serum-induced nuclear translocation of gsk-3beta. These results suggested that mek1/2 induces tyrosine phosphorylation of gsk-3beta and this cellular…	0.2	SIGNOR-244780
TLR4	protein	O00206	UNIPROT	ERK1/2	proteinfamily	SIGNOR-PF1	SIGNOR	up-regulates activity	phosphorylation			9606									28137827	YES		miannu	Binding of S100A9 to TLR4 stimulates the phosphorylation of JNK, ERK1/2, and p38 MAPK, which leads to the activation of c-Jun, CREB, and NF-κB. Activation of neutrophils by S100A9 also proceeds via p38 MAPK, JNK, and ERK1/2 phosphorylation.	0.393	SIGNOR-261930
ATM	protein	Q13315	UNIPROT	H2AX	protein	P16104	UNIPROT	up-regulates	phosphorylation	Ser140	GKKATQAsQEY	9606									21690091	YES		gcesareni	Upon dna damage, h2ax is phosphorylated by ataxia telangiectasia mutated (atm) and atm-related kinases at serine 139, known as ?_?_?_-H2ax, which serves as a docking site to recruit the mediator of dna damage checkpoint protein 1 (mdc1) to sites of dna damage, named dna damage foci	0.2	SIGNOR-174442
ATM	protein	Q13315	UNIPROT	CREB1	protein	P16220	UNIPROT	down-regulates	phosphorylation	Thr100	LKRLFSGtQISTIAE	9606									15073328	YES		lperfetto	Individual ala substitutions at thr-100, ser-111, or ser-121 inhibited atm-catalyzed phosphate incorporationatm phosphorylated creb in vitro and in vivo in response to ionizing radiation (ir) and h(2)o(2) on a stress-inducible domain. Ir-induced phosphorylation of creb correlated with a decrease in creb transactivation potential and reduced interaction between creb and its transcriptional coactiv…	0.508	SIGNOR-124051
FOXO	proteinfamily	SIGNOR-PF27	SIGNOR	Apoptosis	phenotype	SIGNOR-PH2	SIGNOR	up-regulates				9606	BTO:0000007								14976264	NO		lperfetto	Sirt1 inhibited foxo3's ability to induce cell death.	0.7	SIGNOR-252939
AKT	proteinfamily	SIGNOR-PF24	SIGNOR	FOXO	proteinfamily	SIGNOR-PF27	SIGNOR	down-regulates	phosphorylation	Thr24	LPRPRSCtWPLPRPE	-1	BTO:0000318								10377430	YES		lperfetto	Here we show that the activation of phosphatidylinositol 3 (PI3) kinase by extracellular growth factors induces phosphorylation, nuclear export, and transcriptional inactivation of FKHR1, a member of the FKHR subclass of the forkhead family of transcription factors. Protein kinase B (PKB)/Akt, a key mediator of PI3 kinase signal transduction, phosphorylated recombinant FKHR1 in vitro at threonine…	0.901	SIGNOR-252832
ATM	protein	Q13315	UNIPROT	TP53	protein	P04637	UNIPROT	up-regulates quantity by stabilization	phosphorylation	Ser20	PLSQETFsDLWKLLP	9606	BTO:0001938								15254178	YES		lperfetto	Although the stabilization of p53 was apparently concordant with its phosphorylation on N-terminal serine residues in HFFF-2 cells, it did not require the phosphorylation of Ser15 or Ser20 by ATM, a cellular kinase known to phosphorylate and promote the stabilization of p53 in response to DNA damage.	0.819	SIGNOR-126757
STK11	protein	Q15831	UNIPROT	AMPK	complex	SIGNOR-C15	SIGNOR	up-regulates activity	phosphorylation			-1									14976552	YES		lperfetto	We recently demonstrated that the LKB1 tumour suppressor kinase, in complex with the pseudokinase STRAD and the scaffolding protein MO25, phosphorylates and activates AMP_activated protein kinase (AMPK).	0.612	SIGNOR-242602
PIM1	protein	P11309	UNIPROT	MYC	protein	P01106	UNIPROT	up-regulates activity	phosphorylation			9606									25280219	YES			FLT3-ITD kinase may regulate c-MYC through STAT5-induced enhancement of PIM kinases (Choudhary et al., 2009), which can modulate c-MYC stability and activity via phosphorylation (van der Lugt et al., 1995s). This is supported by the observation that FLT3-ITD CD34+ cells showed higher PIM activity compared to cells expressing FLT3-WT, indicated by increased expression of the PIM targets including …	0.671	SIGNOR-261557
AKT1	protein	P31749	UNIPROT	CHEK1	protein	O14757	UNIPROT	down-regulates	phosphorylation	Ser280	AKRPRVTsGGVSESP	9606									15107605	YES		gcesareni	The chk1 protein phosphorylated by pkb on serine 280 does not enter into protein complexes after replication arrest. Moreover, chk1 phosphorylated by pkb fails to undergo activating phosphorylation on serine 345 by atm/atr. Phosphorylation by atm/atr and association with other checkpoint proteins are essential steps in activation of chk1.	0.438	SIGNOR-124365
ATM	protein	Q13315	UNIPROT	MDM2	protein	Q00987	UNIPROT	down-regulates activity	phosphorylation	Ser429	KEESVESsLPLNAIE	9606	BTO:0000007								19816404	YES		lperfetto	These data indicate that atm is responsible for directly phosphorylating s386 and s429 after dna damagemdm2 phosphorylation inhibits p53 poly ubiquitination	0.727	SIGNOR-188412
ATM	protein	Q13315	UNIPROT	MDM2	protein	Q00987	UNIPROT	down-regulates activity	phosphorylation	Ser395	SQESEDYsQPSTSSS	-1									12383858	YES		gcesareni	Dephosphorylation stabilizes mdm2 and increases its affinity for p53, inducing p53 degredation. ;phosphorylated s260 and s395 ands260d and s395d mutant peptides inhibited binding of binding of a specific monoclonal antibody raised to mdm2. Phosphorylation of mdm2 regulates p53 degradation.	0.727	SIGNOR-94268
AKT	proteinfamily	SIGNOR-PF24	SIGNOR	MDM2	protein	Q00987	UNIPROT	up-regulates activity	phosphorylation	Ser186	RQRKRHKsDSISLSF	9606									11504915	YES		lperfetto	Mitogen-induced activation of phosphatidylinositol 3-kinase (pi3-kinase) and its downstream target, the akt/pkb serine-threonine kinase, results in phosphorylation of mdm2 on serine 166 and serine 186. Phosphorylation on these sites is necessary for translocation of mdm2 from the cytoplasm into the nucleus.Both akt expression and serum treatment induced phosphorylation of mdm2 at ser186.	0.2	SIGNOR-244292
KRAS	protein	P01116	UNIPROT	BRAF	protein	P15056	UNIPROT	up-regulates activity	binding			9606									21779497	YES		miannu	The raf family of proteins (raf-1, a-raf, and b-raf) is serine/threonine kinases that bind to the effector region of ras-gtp, thus inducing translocation of the protein to the plasma membrane. Once there, raf proteins are activated and phosphorylated by different protein kinases.	0.872	SIGNOR-156906
STAT5A	protein	P42229	UNIPROT	Proliferation	phenotype	SIGNOR-PH4	SIGNOR	up-regulates				9606									10072077	NO			Here, we demonstrate that, while lymphoid development is normal, Stat5a/b mutant peripheral T cells are profoundly deficient in proliferation and fail to undergo cell cycle progression or to express genes controlling cell cycle progression	0.7	SIGNOR-254302
FLT3	protein	P36888	UNIPROT	CDKN1A	protein	P38936	UNIPROT	up-regulates quantity by expression	transcriptional regulation			10090									15003515	NO			Flt3 Mutation Activates p21WAF1/CIP1 Gene Expression Through the Action of STAT5. Through the Action of STAT5. Co-transfection of p21 promoter-luciferase constructs with Flt3-ITD plasmid into K562 and BaF3 cells results in the induction of p21 promoter activity and a -692/-684 STAT site is important for the induction. STAT5a binds specifically to this element and Flt3-ITD enhances the protein bin…	0.272	SIGNOR-261520
ERK1/2	proteinfamily	SIGNOR-PF1	SIGNOR	AP1	complex	SIGNOR-C154	SIGNOR	up-regulates	phosphorylation	Thr331	CTPVVTCtPSCTAYT	9606									12972619	YES		lperfetto	In a previous study we have observed that exposure of nih 3t3 cells to pdgf or serum leads to c-fos phosphorylation by erk on specific residues, thr232, thr325, thr331, and ser374, within the cooh-terminal c-fos tad we have recently shown that erk phosphorylates multiple residues within the carboxylterminal transactivation domain (tad) of c-fos, thus resulting in its increased transcriptional act…	0.766	SIGNOR-252353
ERK1/2	proteinfamily	SIGNOR-PF1	SIGNOR	AP1	complex	SIGNOR-C154	SIGNOR	up-regulates	phosphorylation	Thr232	GGLPEVAtPESEEAF	9606									7816602	YES		lperfetto	Phosphorylation of the c-fos and c-jun hob1 motif stimulates its activation capacity here we show that the hob1-containing activation domain of c-fos is stimulated by ha-ras in vivo and phosphorylated by a map kinase family member in vitro and that mutating t232 to ala abolishes both functions.	0.766	SIGNOR-252359
sirolimus	chemical	CHEBI:9168	ChEBI	MTOR	protein	P42345	UNIPROT	down-regulates activity	chemical inhibition			9606									7566123	YES		Monia	Consistent with an essential role for FRAP kinase activity in vivo, autophosphorylation of FRAP is inhibited by FKBP12-rapamycin.	0.8	SIGNOR-261074
BAD	protein	Q92934	UNIPROT	TP53	protein	P04637	UNIPROT	up-regulates activity	binding			9606	BTO:0002552								17000778	YES		lperfetto	We also demonstrate that bad physically interacts with cytoplasmic p53. bad is able to direct p53 to the mitochondria and forms a p53/bad complex at the mitochondria. the mitochondrial p53/bad complex promotes apoptosis	0.306	SIGNOR-149815
DNA_damage	stimulus	SIGNOR-ST1	SIGNOR	ATR	protein	Q13535	UNIPROT	up-regulates				9606									21034966	NO		lperfetto	the ATM-Chk2 and ATR-Chk1 pathways, which are activated by DNA double-strand breaks (DSBs) and single-stranded DNA respectively.	0.7	SIGNOR-242609
ATM	protein	Q13315	UNIPROT	TP53	protein	P04637	UNIPROT	up-regulates quantity by stabilization	phosphorylation	Ser20	PLSQETFsDLWKLLP	9606	BTO:0000552								20663147	YES		gcesareni	DeltaNp63alpha depletion by RNAi reduces steady-state ATM mRNA and protein levels, and attenuates p53 Serine-15 phosphorylation. Conversely, ectopic expression of DeltaNp63alpha in p63-null tumour cells stimulates ATM transcription and p53 Serine-15 phosphorylation	0.819	SIGNOR-167156
RPS6KA1	protein	Q15418	UNIPROT	CREB1	protein	P16220	UNIPROT	up-regulates activity	phosphorylation	Ser119	EILSRRPsYRKILND	9606									10558990	YES		lperfetto	The rsks phosphorylate the trascription factor creb at serine 133 to promote cell survival.	0.72	SIGNOR-72117
DNA_damage	stimulus	SIGNOR-ST1	SIGNOR	CHEK1	protein	O14757	UNIPROT	up-regulates				9606									26527132	NO		lperfetto	Checkpoint kinase 1 (CHK1) is a key component of the ATR-dependent DNA damage response pathway that protects cells from RS by preventing replication fork collapse and activating homologous DNA repair.	0.7	SIGNOR-242616
TP53	protein	P04637	UNIPROT	BAX	protein	Q07812	UNIPROT	up-regulates quantity by expression	transcriptional regulation			9606									7834749	YES	Nuclear p53	amattioni	Bax is a p53 primary-response gene, presumably involved in a p53-regulated pathway for induction of apoptosis	0.747	SIGNOR-33922
CTNNB1	protein	P35222	UNIPROT	Proliferation	phenotype	SIGNOR-PH4	SIGNOR	up-regulates				9606									18697834	NO		Simone Vumbaca	we showed that β-catenin, a key component of the canonical Wnt-signalling cascade, is present in quiescent satellite cells in the inactive form, but subsequently becomes activated following satellite-cell activation. This observation suggests that the proliferation initiated by the Wnt-signalling cascade does not have to rely on transcription of β-catenin, but rather on activation of this protein…	0.7	SIGNOR-255654
FLT3	protein	P36888	UNIPROT	RAD51	protein	Q06609	UNIPROT	up-regulates quantity by expression	transcriptional regulation			10090									15626738	NO			FLT3-ITD-TKD dual mutants induce hyperactivation of STAT5 and up-regulation of its downstream targets Bcl-x(L) and RAD51 in Ba/F3 cells	0.242	SIGNOR-261550
pimozide	chemical	CHEBI:8212	ChEBI	STAT5A	protein	P42229	UNIPROT	down-regulates activity	chemical inhibition			9606	BTO:0001545								23264850	YES		miannu	We have identified the psychotropic drug pimozide as an effective inhibitor of STAT5 function. Pimozide inhibits the tyrosine phosphorylation of STAT5, leading to the death of AML cells through the induction of apoptosis.	0.8	SIGNOR-260125
MDM2	protein	Q00987	UNIPROT	TP53	protein	P04637	UNIPROT	down-regulates quantity by destabilization	ubiquitination			9606									10935507	YES		lperfetto	Many posttranslational modifications of p53, such as phosphorylation, dephosphorylation, acetylation and ribosylation, have been shown to occur following cellular stress. Some of these modifications may activate the p53 protein, interfere with MDM2 binding and/or dictate cellular localization of p53.	0.969	SIGNOR-80528
DNA_damage	stimulus	SIGNOR-ST1	SIGNOR	ATM	protein	Q13315	UNIPROT	up-regulates activity				9606	BTO:0000007								12556884	NO		miannu	Cellular irradiation induces rapid intermolecular autophosphorylation of serine 1981 that causes dimer dissociation and initiates cellular ATM kinase activity. Most ATM molecules in the cell are rapidly phosphorylated on this site after doses of radiation as low as 0.5 Gy, and binding of a phosphospecific antibody is detectable after the introduction of only a few DNA double-strand breaks in the …	0.7	SIGNOR-253376
ERK1/2	proteinfamily	SIGNOR-PF1	SIGNOR	MYC	protein	P01106	UNIPROT	up-regulates quantity by stabilization	phosphorylation	Ser62	LLPTPPLsPSRRSGL	10116	BTO:0004725								11018017	YES			Phosphorylation of Ser 62 is required for Ras-induced stabilization of Myc, likely mediated through the action of ERK.	0.2	SIGNOR-252079
AKT	proteinfamily	SIGNOR-PF24	SIGNOR	IKK-complex	complex	SIGNOR-C14	SIGNOR	up-regulates	phosphorylation			9606	BTO:0001454								19609947	YES		lperfetto	Although there are likely to be multiple levels of crosstalk between the pi3k-akt and nf-kb pathways, one mechanism has been attributed to direct phosphorylation of the amino acid residue t23 on ikb kinase alfa (ikkalfa) by akt, thereby leading to activation of this kinase upstream of nf-kb akt mediates ikkalpha phosphorylation at threonine 23 akt transiently associates in vivo with ikk and induc…	0.671	SIGNOR-244281
CHEK2	protein	O96017	UNIPROT	TP53	protein	P04637	UNIPROT	up-regulates quantity by stabilization	phosphorylation	Ser37	NVLSPLPsQAMDDLM	9606									10710310	YES		gcesareni	Chk1/chk2 and atm/atr also phosphorylate the effector p53, increasing its stability.We Have demonstrated that the human homologs of the checkpoint kinases, chk1 and chk2/hcds1, phosphorylate at least three dna damage-inducible phosphorylation sites in p53.	0.756	SIGNOR-75637
PIM1	protein	P11309	UNIPROT	CDKN1A	protein	P38936	UNIPROT	up-regulates quantity by stabilization	phosphorylation	Thr145	QGRKRRQtSMTDFYH	9606									20307683	YES		lperfetto	Pim-2 phosphorylation of p21(cip1/waf1) enhances its stability and inhibits cell proliferation in hct116 cellshere we demonstrate that like pim-1, pim-2 also phosphorylates the cell cycle inhibitor p21(cip1/waf1) (p21) on thr145 in vitro and in vivo	0.476	SIGNOR-164642
IKBKB	protein	O14920	UNIPROT	NfKb-p65/p50	complex	SIGNOR-C13	SIGNOR	down-regulates	phosphorylation			9606									11158290	YES		lperfetto	Ikkbeta phosphorylates p105 resulting in its degradation, which releases tpl2 resulting in activation of the pro-proliferative map kinase- pathway.	0.867	SIGNOR-217403
ATM	protein	Q13315	UNIPROT	MDM2	protein	Q00987	UNIPROT	down-regulates activity	phosphorylation	Ser395	SQESEDYsQPSTSSS	9606	BTO:0000971								17936559	YES		gcesareni	Dephosphorylation stabilizes mdm2 and increases its affinity for p53, inducing p53 degredation. ;phosphorylated s260 and s395 ands260d and s395d mutant peptides inhibited binding of binding of a specific monoclonal antibody raised to mdm2. Phosphorylation of mdm2 regulates p53 degradation.	0.727	SIGNOR-158324
BAD	protein	Q92934	UNIPROT	Apoptosis	phenotype	SIGNOR-PH2	SIGNOR	up-regulates				9606	BTO:0002418;BTO:0002552;BTO:0000018; BTO:0002207;BTO:0002203								23725574	NO		irozzo	Our data suggested that increased expression of BAD enhance apoptosis and has negative influence on cell proliferation and tumor growth in NSCLC. Bad is a new potential target for tumor interventions.	0.7	SIGNOR-256259
JNK	proteinfamily	SIGNOR-PF15	SIGNOR	BCL2	protein	P10415	UNIPROT	up-regulates activity	phosphorylation	Ser70	RDPVARTsPLQTPAA	-1									11323415	YES		Luana	JNK1 directly phosphorylates Bcl2 at Ser70 in vitro and co-localizes with Bcl2 in mitochondrial membranes in vivo.	0.2	SIGNOR-261133
AKT	proteinfamily	SIGNOR-PF24	SIGNOR	FOXO	proteinfamily	SIGNOR-PF27	SIGNOR	down-regulates	phosphorylation			9606									21798082	YES		lperfetto	Akt inactivates protein degradation by phosphorylating and thus repressing the transcription factors of the foxo family, and stimulates protein synthesis via the mammalian target of rapamycin (mtor) and glycogen synthase kinase 3b (gsk3b).	0.901	SIGNOR-252820
ERK1/2	proteinfamily	SIGNOR-PF1	SIGNOR	STK11	protein	Q15831	UNIPROT	down-regulates activity	phosphorylation	Ser428	SSKIRRLsACKQQ	9606									25846811	YES		lperfetto	Directly and/or through the activation of p90RSK, ERK phosphorylates LKB-1 at Ser325 and Ser428. The phosphorylation of LKB-1 causes the dissociation of LKB-1 from AMPK, resulting in the impaired activation of AMPK.	0.2	SIGNOR-244595
STAT3	protein	P40763	UNIPROT	Proliferation	phenotype	SIGNOR-PH4	SIGNOR	up-regulates				9606	BTO:0002314								25194572	NO		lperfetto	STAT3 signaling controls satellite cell expansion and skeletal muscle repair	0.7	SIGNOR-245048
MAPK14	protein	Q16539	UNIPROT	MAPKAPK2	protein	P49137	UNIPROT	up-regulates activity	phosphorylation	Thr206	PNAILKLtDFGFAKE	-1									7592979	YES		miannu	In Vitro Activation of MAPKAP Kinase 2 by p38/40. the constitutively active mutant T205E,T317E shows no changes in activity after treatment with the p38/40 fraction	0.801	SIGNOR-250101
GSK3B	protein	P49841	UNIPROT	NOTCH1	protein	P46531	UNIPROT	up-regulates	phosphorylation			9606									12123574	YES		gcesareni	Here, we observed that gsk3beta was able to bind and phosphorylate notch1ic in vitro, and attenuation of gsk3beta activity reduced phosphorylation of notchic in vivo.Functionally, ligand-activated signaling through the endogenous notch1 receptor was reduced in gsk3beta fibroblasts, implying a positive role for gsk3beta in mammalian notch signaling.	0.465	SIGNOR-90608
GSK3B	protein	P49841	UNIPROT	MYC	protein	P01106	UNIPROT	down-regulates quantity by destabilization	phosphorylation	Thr58	KKFELLPtPPLSPSR	9606									14563837	YES		gcesareni	Conversely, overexpression of gsk-3 alpha or gsk-3 beta enhances thr-58 phosphorylation and ubiquitination of c-myc	0.699	SIGNOR-118844
MTOR	protein	P42345	UNIPROT	mTORC2	complex	SIGNOR-C2	SIGNOR	form complex	binding			9606									25628925	YES		lperfetto	Depending on their binding partners and sensitivities to rapamycin, mtor resides in at least two distinct complexes, termed mtor complex 1 (mtorc1, containing raptor, fkbp12, pras40 and mlst8) and mtor complex 2 (mtorc2, containing rictor, sin1, protor and mlst8)	0.718	SIGNOR-262534
U0126	chemical	CHEBI:90693	ChEBI	MEK1/2	proteinfamily	SIGNOR-PF25	SIGNOR	down-regulates	chemical inhibition			9606									9873633	YES		lperfetto	The mek1/2 inhibitors pd98059, sl327, and u0126 have been extensively used to implicate erk1/2 in neuroplasticity. u0126 was found to functionally antagonize ap-1 transcriptional activity via noncompetitive the dual specificity kinase mek with an ic50 of 0.07 microm for mek 1 and 0.06 microm for mek 2.	0.8	SIGNOR-244958
ERK1/2	proteinfamily	SIGNOR-PF1	SIGNOR	AP1	complex	SIGNOR-C154	SIGNOR	up-regulates	phosphorylation	Ser374	PSSDSLSsPTLLAL	9606									12972619	YES		lperfetto	In a previous study we have observed that exposure of nih 3t3 cells to pdgf or serum leads to c-fos phosphorylation by erk on specific residues, thr232, thr325, thr331, and ser374, within the cooh-terminal c-fos tad we have recently shown that erk phosphorylates multiple residues within the carboxylterminal transactivation domain (tad) of c-fos, thus resulting in its increased transcriptional act…	0.766	SIGNOR-252358
FLT3	protein	P36888	UNIPROT	PARP1	protein	P09874	UNIPROT	up-regulates quantity by expression	transcriptional regulation			10090									21228325	NO			Interestingly, quantitative RT-PCR analysis demonstrated a 2-fold increase in PARP-1 expression. Western blotting analysis of protein nuclear extracts from FLT3/ITD B-cells confirmed that PARP1 was up-regulated, compared with wild-type controls	0.241	SIGNOR-261554
GRB10	protein	Q13322	UNIPROT	PI3K	complex	SIGNOR-C156	SIGNOR	up-regulates activity	binding			10090	BTO:0001516								23246379	YES			Grb10 transduces signal from FLT3 by direct interaction with p85 and Ba/F3-FLT3-ITD cells expressing Grb10 exhibits higher STAT5 activation	0.338	SIGNOR-255946
PDPK1	protein	O15530	UNIPROT	AKT	proteinfamily	SIGNOR-PF24	SIGNOR	up-regulates activity	phosphorylation	Thr308	KDGATMKtFCGTPEY	9606		BTO:0000887;BTO:0001103;BTO:0001760							9512493	YES		lperfetto	The activation of PKBbeta and PKBamma by PDK11 was accompanied by the phosphorylation of the residues equivalent to Thr308 in PKBalpha, namely Thr309 (PKBbeta) and Thr305 (PKBgamma)	0.788	SIGNOR-244480
MAPK14	protein	Q16539	UNIPROT	GSK3B	protein	P49841	UNIPROT	down-regulates	phosphorylation	Ser389	ARIQAAAsTPTNATA	9606		BTO:0000142							17726008	YES		gcesareni	However p38alfa also inactivates gsk3b by direct phosphorilation of the c-terminal residue ser389. this non-canonicl p38 mapk-dependent phosphorilation of gsk3b seems to occur primarily in the brain and thymocytes.	0.291	SIGNOR-157548
ATM	protein	Q13315	UNIPROT	MDM2	protein	Q00987	UNIPROT	down-regulates activity	phosphorylation	Ser386	DDKITQAsQSQESED	9606	BTO:0000007								19816404	YES		lperfetto	These data indicate that atm is responsible for directly phosphorylating s386 and s429 after dna damagemdm2 phosphorylation inhibits p53 poly ubiquitination	0.727	SIGNOR-188408
ATR	protein	Q13535	UNIPROT	CREB1	protein	P16220	UNIPROT	down-regulates	phosphorylation	Ser107	SVDSVTDsQKRREIL	9606									15073328	YES		lperfetto	Atm phosphorylated creb in vitro and in vivo in response to ionizing radiation (ir) and h(2)o(2) on a stress-inducible domain. Ir-induced phosphorylation of creb correlated with a decrease in creb transactivation potential and reduced interaction between creb and its transcriptional coactivator, creb-binding protein (cbp). A creb mutant containing ala substitutions at atm phosphorylation sites di…	0.363	SIGNOR-124060
ATM	protein	Q13315	UNIPROT	CHEK1	protein	O14757	UNIPROT	up-regulates	phosphorylation	Ser345	LVQGISFsQPTCPDH	9606									20068082	YES		gcesareni	Atr (predominantly) or atm (to a lesser extent) phosphorylates chk1 at ser317/345, directly leading to activation.	0.821	SIGNOR-163110
TLR4	protein	O00206	UNIPROT	JNK	proteinfamily	SIGNOR-PF15	SIGNOR	up-regulates activity	phosphorylation			9606									28137827	YES		miannu	Binding of S100A9 to TLR4 stimulates the phosphorylation of JNK, ERK1/2, and p38 MAPK, which leads to the activation of c-Jun, CREB, and NF-κB. Activation of neutrophils by S100A9 also proceeds via p38 MAPK, JNK, and ERK1/2 phosphorylation.	0.443	SIGNOR-261929
TP53	protein	P04637	UNIPROT	BAX	protein	Q07812	UNIPROT	up-regulates	binding			9606									14963330	YES		gcesareni	Tp53 directly activated the proapoptotic bcl-2 protein bax in the absence of other proteins to permeabilize mitochondria and engage the apoptotic program	0.747	SIGNOR-121895
TP53	protein	P04637	UNIPROT	BAX	protein	Q07812	UNIPROT	up-regulates	binding			9606									16151013	YES	Cytosolic p53	amattioni	P53 also accumulates in the cytoplasm where it directly activates bax to promote mitochondrial outer membrane permeabilization.	0.747	SIGNOR-140242
AKT	proteinfamily	SIGNOR-PF24	SIGNOR	FOXO	proteinfamily	SIGNOR-PF27	SIGNOR	down-regulates activity	phosphorylation	Thr32	QSRPRSCtWPLQRPE	9606	BTO:0000150;BTO:0001130;BTO:0001271;BTO:0000527								19188143	YES		lperfetto	Akt-dependent phosphorylation of foxo3a (thr32, ser253, and ser315 for human foxo3) enhances foxo3a/14-3-3 Interaction and promotes foxo3a nuclear export to the cytoplasm, resulting in the repression of foxo3a transcriptional function	0.901	SIGNOR-252825
olaparib	chemical	CHEBI:83766	ChEBI	PARP1	protein	P09874	UNIPROT	down-regulates	chemical inhibition			9606									Other	YES	Selleck	gcesareni		0.8	SIGNOR-195016
MDM2	protein	Q00987	UNIPROT	TP53	protein	P04637	UNIPROT	down-regulates quantity by destabilization	ubiquitination			9606									22337874	YES		lperfetto	The E3 ubiquitin ligase, MDM2, uses a dual-site mechanism to ubiquitinate and degrade the tumor suppressor protein p53, involving interactions with the N-terminal hydrophobic pocket and the acidic domain of MDM2.	0.969	SIGNOR-196116
CHEK1	protein	O14757	UNIPROT	RAD51	protein	Q06609	UNIPROT	up-regulates	phosphorylation	Thr309	LRKGRGEtRICKIYD	9606									15665856	YES		gcesareni	We demonstrate that chk1 interacts with rad51, and that rad51 is phosphorylated on thr 309 in a chk1-dependent manner	0.817	SIGNOR-133375
BAX	protein	Q07812	UNIPROT	BCL2	protein	P10415	UNIPROT	down-regulates activity	binding												8358790	YES		lperfetto	Bax shows extensive amino acid homology with Bcl-2 and forms homodimers and heterodimers with Bcl-2 in vivo. When Bax predominates, programed cell death is accelerated, and the death repressor activity of Bcl-2 is countered.	0.65	SIGNOR-249612
AKT	proteinfamily	SIGNOR-PF24	SIGNOR	MDM2	protein	Q00987	UNIPROT	up-regulates activity	phosphorylation	Ser188	RKRHKSDsISLSFDE	9606									15169778	YES		lperfetto	Stabilization of mdm2 via decreased ubiquitination is mediated by protein kinase b/akt-dependent phosphorylationhere we show that pkb inhibits mdm2 self-ubiquitination via phosphorylation of mdm2 on ser(166) and ser(188)	0.2	SIGNOR-244300
GSK3B	protein	P49841	UNIPROT	RPS6K	proteinfamily	SIGNOR-PF26	SIGNOR	up-regulates activity	phosphorylation			9606									33081032	YES		miannu	GSK3β regulates S6K1 activity positively through modulating phosphorylation of S6K1 at p.Ser371.	0.368	SIGNOR-263513
PDPK1	protein	O15530	UNIPROT	RPS6KB1	protein	P23443	UNIPROT	up-regulates	phosphorylation	Thr252	HDGTVTHtFCGTIEY	9606									9445476	YES		gcesareni	A regulatory link between p70s6k and pkb was demonstrated, as pdk1 was found to selectively phosphorylate p70s6k at thr229. More importantly, pdk1 activated p70s6k in vitro and in vivo, whereas the catalytically inactive pdk1 blocked insulin-induced activation of p70s6k. one of the most studied signalling events controlled by ptdins(3,4,5)p3, comprises the activation of a group of agc family prot…	0.764	SIGNOR-55306
CHEK2	protein	O96017	UNIPROT	TP53	protein	P04637	UNIPROT	up-regulates quantity by stabilization	phosphorylation	Ser37	NVLSPLPsQAMDDLM	9606									15659650	YES		lperfetto	The cell cycle checkpoint kinases CHK1 and CHK2 have been shown to phosphorylate multiple sites in the N-terminal domain of p53, consequently leading to p53 stabilization and activation. Phosphorylation of at least three of these sites, Ser366, Ser378, and Thr387, was induced by DNA damage. On activation, both of these kinases also phosphorylate multiple sites in the p53 N-terminal domain. These …	0.756	SIGNOR-153475
CyclinE/CDK2	complex	SIGNOR-C16	SIGNOR	RB1	protein	P06400	UNIPROT	down-regulates activity	phosphorylation	Ser608	TAADMYLsPVRSPKK		BTO:0001968								10207050	YES		llicata	In the present assay, ΔP3,4HA repressed E2F-mediated transcription similarly to wild-type pRB, suggesting that phosphorylation at other sites on ΔP3,4HA can disrupt its interaction with E2F and that these two sites are not sufficient to regulate E2F binding on DNA. This result is consistent with another report which showed that mutation of the human sites 8 and 9 (human Ser608 and Ser612) repress…	0.756	SIGNOR-250747
RPS6K	proteinfamily	SIGNOR-PF26	SIGNOR	MTOR	protein	P42345	UNIPROT	down-regulates activity	phosphorylation	Thr2446	NKRSRTRtDSYSAGQ	9606									15905173	YES		lperfetto	Importantly, phosphorylation of mTOR by S6K1 occurs at threonine 2446/serine 2448. This region has been shown previously to be part of a regulatory repressor domain. These sites are also constitutively phosphorylated in the breast cancer cell line MCF7 carrying an amplification of the S6K1 geneit has been proposed that other inputs, in addition to phosphorylation of Thr-2446/Ser-2448 by S6K1, are…	0.2	SIGNOR-137255
AMPK	complex	SIGNOR-C15	SIGNOR	MAPK14	protein	Q16539	UNIPROT	up-regulates activity				10090									20660302	NO			P38 MAPK mediates the effect of AMPK on Gr induced transcriptional activity	0.283	SIGNOR-255951
ATM	protein	Q13315	UNIPROT	TP53	protein	P04637	UNIPROT	up-regulates quantity by stabilization	phosphorylation	Ser15	PSVEPPLsQETFSDL	9606									20663147	YES		gcesareni	Deltanp63 transcriptionally regulates atm to control p53 serine-15 phosphorylation.	0.819	SIGNOR-167152
TNF	protein	P06804	UNIPROT	IRS1	protein	P35569	UNIPROT	down-regulates				9606									11287630	NO		gcesareni	Irs-1 tyrosine phosphorylation by tnf was blocked by rapamycin, an inhibitor of the mammalian target of rapamycin (mtor), a downstream target of akt. these results suggest that tnf impairs insulin signaling through irs-1	0.338	SIGNOR-106599
TNF	protein	P06804	UNIPROT	PI3K	complex	SIGNOR-C156	SIGNOR	up-regulates activity				10090									10485710	NO		lperfetto	Tnf activates phosphatidylinositol-3-oh kinase (pi(3)k).	0.283	SIGNOR-252733
TNF	protein	P06804	UNIPROT	MAPK14	protein	P47811	UNIPROT	up-regulates activity				9606									16813528	NO		lperfetto	These observations suggest that tnf-alpha activates p38 map kinase during the inflammatory response at the injured growth plate, and tnf-alpha-p38 signaling seems to be required for marrow mesenchymal cell proliferation and migration at the growth plate injury site and in cell culture.	0.574	SIGNOR-147369
TNF	protein	P06804	UNIPROT	NFKB	complex	SIGNOR-C13	SIGNOR	up-regulates activity				9606									8530143	NO		andrea cerquone perpetuini	Data from our laboratory demonstrate that the TNF signal transduction pathway-mediating NF-kappa B activation involves two phospholipases, a phosphatidylcholine-specific phospholipase C (PC-PLC) and an endosomal acidic sphingomyelinase (aSMase). The aSMase activation by TNF is secondary to the generation of 1,2-diacylglycerol (DAG) produced by a TNF-responsive PC-PLC. SMase and its product cerami…	0.635	SIGNOR-255689
TNF	protein	P06804	UNIPROT	AKT	proteinfamily	SIGNOR-PF24	SIGNOR	up-regulates				9606									11287630	NO		lperfetto	Tumor necrosis factor (tnf) inhibited insulin-promoted tyrosine phosphorylation of irs-1 and activated the akt/protein kinase b serine-threonine kinase, a downstream target for phosphatidylinositol 3-kinase	0.407	SIGNOR-244458
TNF	protein	P06804	UNIPROT	TNFRSF1A	protein	P25118	UNIPROT	up-regulates activity	binding			9606									21133840	YES		simone vumbaca	TNF alpha and IFN gamma exhibit a cross-talk at the level of TNFR1 to induce activation of macrophages	0.921	SIGNOR-256025
TNFRSF1A	protein	P25118	UNIPROT	MAPK14	protein	P47811	UNIPROT	up-regulates activity													17151142	NO			[...] TNF-alpha is critical for p38 activation during the early stages of myoblast differentiation	0.34	SIGNOR-253600
TNFRSF1A	protein	P25118	UNIPROT	NFKBIA	protein	Q9Z1E3	UNIPROT	down-regulates quantity by destabilization				10090	BTO:0002572;BTO:0000801								21232017	NO		lperfetto	Tnfr1-induced phosforylation and degradarionn of ikb are almost completely abolished in tradd-deficient mefs,these hallmarks of classical nf-kn signaling are only attenuated in tradd-deficient macrophage.	0.513	SIGNOR-235789
IGF1R	protein	Q60751	UNIPROT	IRS1	protein	P35569	UNIPROT	up-regulates	phosphorylation	Tyr983	VPNSRGDYMTMQIGC	9606									17827393	YES		gcesareni	Furthermore, IGF-1 stimulates tyrosine phosphorylation of insulin receptor substrate-1 (IRS-1) and IRS-2 and their association with the p85 subunit of phosphoinositide-3 kinase (PI3K).	0.852	SIGNOR-157758
IGF1R	protein	Q60751	UNIPROT	PI3K	complex	SIGNOR-C156	SIGNOR	up-regulates	binding			9606									18595745	YES		gcesareni	Igf-1 activated both the pi3k and the extracellular signal-regulated kinase [?] (erk [?]) Pathways as evidenced by phosphorylation of either akt or erk1 [?]/2 (respectively)	0.671	SIGNOR-252690
IGF1R	protein	Q60751	UNIPROT	AKT	proteinfamily	SIGNOR-PF24	SIGNOR	up-regulates activity				10090	BTO:0000165								11715022	NO		lperfetto	we show that IGF-1 unexpectedly acts via Akt to antagonize calcineurin signalling during myotube hypertrophy.	0.364	SIGNOR-244403
IGF1R	protein	Q60751	UNIPROT	PDPK1	protein	Q9Z2A0	UNIPROT	up-regulates	phosphorylation	Tyr379	DEDCYGNYDNLLSQF	9606									20643654	YES		lperfetto	Previous studies indicate that optimal activation of PDK1 requires phosphorylation of Tyr373/376, and growth factor receptor activation leads to PDK1 recruitment to the plasma membrane, followed by sequential phosphorylation of Tyr9 and then Tyr373/376	0.33	SIGNOR-166714
IGF1R	protein	Q60751	UNIPROT	SHC1	protein	P98083	UNIPROT	up-regulates activity	binding			-1									7541045	YES		lperfetto	In our present work, we show that both IRS-1 and SHC interact directly with the juxtamembrane region of the IGFIR in a phosphotyrosine-dependent manner. |We propose a model in which IGFIR autophosphorylation of Tyr-950 forms a direct binding site for the amino-terminal receptor binding domains of SHC and IRS-1. This interaction is presumed to facilitate tyrosine phosphorylation of SHC on Tyr-317 …	0.726	SIGNOR-262587
IRS1	protein	P35569	UNIPROT	GRB2	protein	Q60631	UNIPROT	up-regulates activity	binding			9606	BTO:0000156								11259577	YES		lperfetto	Association ofinsulinreceptor substrate 1 (irs-1) y895 with grb-2 mediates theinsulinsignaling involved in irs-1-deficient brown adipocyte mitogenesis.	0.783	SIGNOR-236614
IRS1	protein	P35569	UNIPROT	PI3K	complex	SIGNOR-C156	SIGNOR	up-regulates activity	binding			9606		BTO:0000551							20966354	YES		lperfetto	Irs proteins are capable of both regulating and activating pi3k, depending on the cell of origin.	0.762	SIGNOR-256170
GSK3A	protein	Q2NL51	UNIPROT	TSC2	protein	Q61037	UNIPROT	up-regulates	phosphorylation			9606							phosphorylation:Ser1387	QPLSKSSsSPELQTL	16959574	YES		gcesareni	Gsk3 inhibits the mtor pathway by phosphorylating tsc2 in a manner dependent on ampk-priming phosphorylation.	0.328	SIGNOR-149377
GSK3A	protein	Q2NL51	UNIPROT	MCL1	protein	P97287	UNIPROT	down-regulates quantity by destabilization	phosphorylation	Ser140	KSSGADGSLPSTPPP	9606	BTO:0000567								16543145	YES			MCL-1 was phosphorylated by GSK-3 at a conserved GSK-3 phosphorylation site (S159). Glycogen Synthase Kinase-3 Regulates Mitochondrial Outer Membrane Permeabilization and Apoptosis by Destabilization of MCL-1. threonine 163, which represents the GSK-3 priming phosphorylation in this protein	0.454	SIGNOR-251217
GSK3A	protein	Q2NL51	UNIPROT	PKD2	protein	O35245	UNIPROT	unknown	phosphorylation	Ser72	AGASASPSPPLSSCS	9606	BTO:0000007	BTO:0000671							16551655	YES		llicata	We report the identification of a new phosphorylation site for pc2 within its n-terminal domain (ser(76)) and demonstrate that this residue is phosphorylated by glycogen synthase kinase 3 (gsk3).	0.2	SIGNOR-145306
GSK3A	protein	Q2NL51	UNIPROT	Grb14	protein	Q9JLM9	UNIPROT	down-regulates activity	phosphorylation			-1									28130417	YES		lperfetto	Phosphorylation of clustered serine residues in the N-terminus of BPS domain negatively regulates formation of the complex between human Grb14 and insulin receptor| In vitro kinase assay using the motif-derived peptides showed that the serine residues located in N-terminal (Ser358, Ser362 and Ser366) and C-terminal (Ser419 and Ser423) regions of the BPS domain were phosphorylated by GSK-3.	0.259	SIGNOR-264871
GSK3A	protein	Q2NL51	UNIPROT	AKT	proteinfamily	SIGNOR-PF24	SIGNOR	down-regulates activity	phosphorylation			10090	BTO:0005655								23142783	YES		gcesareni	GSK3_ negatively regulates AKT activation by phosphorylating AKT at T312 in the substrate binding site, which inhibited IL-1-induced AKT activation and function.	0.666	SIGNOR-252455
GSK3A	protein	Q2NL51	UNIPROT	MYC	protein	P01108	UNIPROT	down-regulates quantity by destabilization	phosphorylation	Thr58	KKFELLPTPPLSPSR	9606									16023596	YES		gcesareni	Similar to c-myc, similar to c-myc, we report here that phosphorylation of c-jun by gsk3 creates a high-affinity binding site for the e3 ligase fbw7, which targets c-jun for polyubiquitination and proteasomal degradation.	0.412	SIGNOR-138596
MCL1	protein	P97287	UNIPROT	BAX	protein	Q07813	UNIPROT	down-regulates	binding			9606									17289999	YES		gcesareni	Which of the multiple pro-survival proteins that can bind Bax (fig. S15A) can functionally restrain it? Mcl-1 must, because neutralizing Mcl-1 by enforced Noxa expression rendered MEFs containing only Bax (Bak KO cells) sensitive to the Bad BH3 mimetic ABT-737 (Fig. 4A), which inactivates Bcl-2, Bcl-xL, and Bcl-w	0.8	SIGNOR-151787
INSR	protein	P15208	UNIPROT	IRS1	protein	P35569	UNIPROT	up-regulates activity	phosphorylation	Tyr608	NLHTDDGYMPMSPGV	10029	BTO:0000246								7651388	YES		lperfetto	Therefore, during insulin stimulation irs-1 undergoes tyrosine phosphorylation, and a portion of tyrosine phosphorylated irs-1 associated with the insulin receptor. The insulin receptor substrate-1 (irs-1) is rapidly phosphorylated on several tyrosine residues by the activated insulin receptor. Insulin signals are mediated through tyrosine phosphorylation of specific proteins such as insulin rece…	0.923	SIGNOR-236756
INSR	protein	P15208	UNIPROT	PI3K	complex	SIGNOR-C156	SIGNOR	up-regulates activity	phosphorylation			9534	BTO:0000298								8385099	YES			The alpha-type 85-kDa subunit of phosphatidylinositol 3-kinase is phosphorylated at tyrosines 368, 580, and 607 by the insulin receptor.	0.605	SIGNOR-252693
INSR	protein	P15208	UNIPROT	PTPN1	protein	P35821	UNIPROT	up-regulates activity	phosphorylation	Tyr152	ISEDVKSYYTVRQLE	-1									11506178	YES		lperfetto	Tyrosine residues 66, 152 and/or 153 of PTP1B are phosphorylated by the activated insulin receptor and are also necessary for formation of the PTP1B:insulin receptor complex| Furthermore, tyrosine phosphorylation of PTP1B by the insulin receptor tyrosine kinase increases the catalytic activity of PTP1B	0.839	SIGNOR-249368
INSR	protein	P15208	UNIPROT	CBL	protein	P22682	UNIPROT	up-regulates activity	phosphorylation			10090									11997497	YES			Insulin receptor phosphorylates Cbl on tyrosines 371, 700, and 774 in the presence of APS. This phosphorylation event is required for the recruitment of Crk to the CAP/Cbl complex and for the subsequent activation of GLUT4 translocation.	0.568	SIGNOR-251305
INSR	protein	P15208	UNIPROT	SHC1	protein	P98083	UNIPROT	up-regulates	binding			9606									11075717	YES		gcesareni	The npxy motif around 960-tyr residue of the insulin receptor binds to the n-terminal ptb domain of shc.	0.708	SIGNOR-84251
Grb14	protein	Q9JLM9	UNIPROT	INSR	protein	P15208	UNIPROT	down-regulates activity	binding												24535599	YES		lperfetto	Growth factor receptor-bound protein 14 (Grb14) interacts with insulin receptor (IR) through the between PH and SH2 (BPS) domain. Grb14-IR complex formation is initiated by insulin stimulation, and the binding event results in the inhibition of insulin signalling.	0.804	SIGNOR-264873
SHC1	protein	P98083	UNIPROT	GRB2	protein	Q60631	UNIPROT	up-regulates	binding			9606	BTO:0000776								10207047	YES		lperfetto	The results indicate that ship, shc, and grb2 form a ternary complex in stimulated b cells, with grb2 stabilizing the interaction between shc and ship. The interactions between shc, grb2, and ship are therefore analogous to the interactions between shc, grb2, and sos. Shc and grb2 may help to localize ship to the cell membrane, regulating ship's inhibitory function following bcr stimulation.	0.968	SIGNOR-235881
SHC1	protein	P98083	UNIPROT	ERK1/2	proteinfamily	SIGNOR-PF1	SIGNOR	up-regulates activity				10090	BTO:0000944								17673906	NO		lperfetto	We report that upon TGF__ stimulation, the activated TGF__ type I receptor (T_RI) recruits and directly phosphorylates ShcA proteins on tyrosine and serine. This dual phosphorylation results from an intrinsic T_RI tyrosine kinase activity that complements its well_defined serine_threonine kinase function. TGF___induced ShcA phosphorylation induces ShcA association with Grb2 and Sos, thereby initi…	0.696	SIGNOR-242628
SHC1	protein	P98083	UNIPROT	MAPK3	protein	Q63844	UNIPROT	up-regulates activity				10090	BTO:0000944								17673906	NO		lperfetto	We report that upon TGF__ stimulation, the activated TGF__ type I receptor (T_RI) recruits and directly phosphorylates ShcA proteins on tyrosine and serine. This dual phosphorylation results from an intrinsic T_RI tyrosine kinase activity that complements its well_defined serine_threonine kinase function. TGF___induced ShcA phosphorylation induces ShcA association with Grb2 and Sos, thereby initi…	0.578	SIGNOR-242625
SHC1	protein	P98083	UNIPROT	MAPK1	protein	P63085	UNIPROT	up-regulates activity				10090	BTO:0000944								17673906	NO		lperfetto	We report that upon TGF__ stimulation, the activated TGF__ type I receptor (T_RI) recruits and directly phosphorylates ShcA proteins on tyrosine and serine. This dual phosphorylation results from an intrinsic T_RI tyrosine kinase activity that complements its well_defined serine_threonine kinase function. TGF___induced ShcA phosphorylation induces ShcA association with Grb2 and Sos, thereby initi…	0.691	SIGNOR-242622
GRB2	protein	Q60631	UNIPROT	SOS1	protein	Q62245	UNIPROT	up-regulates activity	relocalization			10090	BTO:0000669								23452850	YES	GRB2 associated guanine nucleotide exchange factor Sos activates Ras through the exchange of GDP for GTP	lperfetto	Interaction domains of sos1/grb2 are finely tuned for cooperative control of embryonic stem cell fate.	0.903	SIGNOR-235773
GRB2	protein	Q60631	UNIPROT	GAB1	protein	Q9QYY0	UNIPROT	up-regulates	binding			9606									12766170	YES	Grb2-associated binding (Gab) scaffolding/adapter proteins are a family of three members including mammalian Gab1, Gab2, and Gab3 that are highly conserved.	lperfetto	The gab1 docking protein forms a platform for the assembly of a multiprotein signaling complex downstream from receptor tyrosine kinases. In general, recruitment of gab1 occurs indirectly, via the adapter protein grb2	0.875	SIGNOR-235917
GRB2	protein	Q60631	UNIPROT	GAB2	protein	Q9Z1S8	UNIPROT	up-regulates	binding			9606	BTO:0000782;BTO:0001271;BTO:0000785								24737791	YES		milica	The signaling mechanism utilizes an adaptor protein, shc, which binds to a phosphotyrosine residue on the il-2/15r?, Resulting in activation of grb2 and onto akt via the shc-grb2-gab2-pi3k-akt signaling pathway to increase cell proliferation and/or survival	0.926	SIGNOR-204969
GRB2	protein	Q60631	UNIPROT	KIT	protein	P05532	UNIPROT	down-regulates				9606	BTO:0001271								17904548	NO		miannu	Grb2 mediates c-kit degradation through recruitment of cbl to c-kit, leading to ubiquitination of c-kit followed by internalization and degradation	0.656	SIGNOR-157956
GRB2	protein	Q60631	UNIPROT	CBL	protein	P22682	UNIPROT	up-regulates	relocalization			9606									11823423	YES	GRB2 is an adapter protein that provides a critical link between cell surface growth factor receptors and the Ras signaling pathway.	gcesareni	The underlying mechanism seems to involve recruitment of a grb2 c-cbl complex to grb2-specific docking sites of egfr, and concurrent acceleration of receptor ubiquitylation and desensitization.	0.92	SIGNOR-114704
SOS1	protein	Q62245	UNIPROT	KRAS	protein	P32883	UNIPROT	up-regulates	guanine nucleotide exchange factor			9606									25624485	YES	Ras proteins bind GDP/GTP and possess intrinsic GTPase activity.	gcesareni	Because the KRAS-GDP to KRAS-GTP transition catalyzed by the GEF, son of sevenless 1 (SOS1), represents the rate-limiting step for nucleotide exchange, disrupting the activating SOS1/KRAS protein interaction has also been the focus of drug development efforts	0.832	SIGNOR-122075
GAB1	protein	Q9QYY0	UNIPROT	PI3K	complex	SIGNOR-C156	SIGNOR	up-regulates	binding			9606									11043767	YES		lperfetto	We have shown that gab1 colocalizes pi3k with sh2 domain-containing inositol phosphatase (ship) and shp2, two enzymes that regulate pi3k-dependent signaling. The src homology 2 (sh2) domain of the phosphatidylinositol 3-kinase (pi3k) regulatory subunit binds gab1 in a phosphorylation-independent manner. Moreover, the regulatory subunit of pi3k can mediate the association of gab1 and receptor prot…	0.529	SIGNOR-252676
GAB2	protein	Q9Z1S8	UNIPROT	PI3K	complex	SIGNOR-C156	SIGNOR	up-regulates	binding			9606									24737791	YES		milica	The signaling mechanism utilizes an adaptor protein, shc, which binds to a phosphotyrosine residue on the il-2/15r?, Resulting in activation of grb2 and onto akt via the shc-grb2-gab2-pi3k-akt signaling pathway to increase cell proliferation and/or survival	0.519	SIGNOR-252677
KIT	protein	P05532	UNIPROT	GRB2	protein	Q60631	UNIPROT	up-regulates activity	binding			9606					phosphorylation:Tyr703	DHAEAALyKNLLHSK			10377264	YES		gcesareni	We furthermore demonstrate that the adapter protein Grb2 is a specific binding partner for both phosphorylated Tyr-703 and phosphorylated Tyr-936, whereas the adapter protein Grb7 binds selectively to phosphorylated Tyr-936.	0.656	SIGNOR-248283
KIT	protein	P05532	UNIPROT	PTPN11	protein	P35235	UNIPROT	up-regulates activity	phosphorylation			10090	BTO:0002882								22806893	YES		irozzo	SHP2 can be phosphorylated at 2 C-terminal tyrosyl residues by receptor tyrosine kinases, including KIT as well as cytosolic tyrosine kinases, including Src and Abl. The level of tyrosyl phosphorylation of SHP2 has been associated with its recruitment to the receptor.Thus, pharmacologic inhibition of SHP2 phosphatase function might permit SHP2 to return to its inactive conformation resulting in r…	0.676	SIGNOR-256140
KIT	protein	P05532	UNIPROT	PI3K	complex	SIGNOR-C156	SIGNOR	up-regulates activity	binding			10090	BTO:0000141								18179858	YES		irozzo	KIT mutations within the carboxy-terminal region of the cytoplasmic tyrosine kinase domain (TK2), such as KITD816V, stabilize the KIT activation loop conformation in its active form.Previous studies have demonstrated hyperactivation of p85α regulatory subunit of class IA phosphatidylinositol-3-kinase (PI3K) in cell lines expressing the activation loop mutant of KIT. Although p85α is hyperphosphor…	0.711	SIGNOR-256121
KIT	protein	P05532	UNIPROT	ERK1/2	proteinfamily	SIGNOR-PF1	SIGNOR	up-regulates activity				9606	BTO:0000830								15526160	NO		miannu	A number of studies have demonstrated the ability of SCF to activate the Ras-Erk pathway. The adapter protein Grb2 can directly associate with phosphorylated Y703 and Y936 in c-Kit	0.288	SIGNOR-254947
PTPN1	protein	P35821	UNIPROT	IRS1	protein	P35569	UNIPROT	down-regulates	dephosphorylation			-1									10660596	YES		lperfetto	Tyrosine dephosphorylation and deactivation of insulin receptor substrate-1 by protein-tyrosine phosphatase 1B. Possible facilitation by the formation of a ternary complex with the Grb2 adaptor protein.	0.757	SIGNOR-74852
PTPN1	protein	P35821	UNIPROT	STAT3	protein	P42227	UNIPROT	down-regulates	dephosphorylation	Tyr705	DPGSAAPYLKTKFIC	9606									15821101	YES		gcesareni	Mechanism of protein tyrosine phosphatase 1b-mediated inhibition of leptin signalling. Ptp1b plays a critical role in the down-regulation of activated-stat3 by dephosphorylating tyr705, that is the phosphorylation site of activation of stat3.	0.519	SIGNOR-135211
PTPN1	protein	P35821	UNIPROT	STAT5A	protein	P42230	UNIPROT	down-regulates activity	dephosphorylation	Tyr694	LAKAVDGYVKPQIKQ	9534									10993888	YES			A Cytosolic Protein-tyrosine Phosphatase PTP1B Specifically Dephosphorylates and Deactivates Prolactin-activated STAT5a and STAT5b	0.67	SIGNOR-248428
PTPN11	protein	P35235	UNIPROT	GRB2	protein	Q60631	UNIPROT	up-regulates activity	binding			9606									11085989	YES		miannu	SHP-2 is thus a positive regulator of ERK by leptin receptors, and both the adaptor function and the phosphatase activity of SHP-2 are critical for this regulation. Based on these data, we conclude that tyrosinephosphorylation of SHP-2 is a mediator of ERK activation viaTyr-985. This is likely to occur via Grb-2 binding to SHP-2 atthe C terminus followed by activation of the Ras-Raf pathwayas sug…	0.779	SIGNOR-263498
PTPN11	protein	P35235	UNIPROT	GAB1	protein	Q9QYY0	UNIPROT	down-regulates	dephosphorylation	Tyr628	KGDKQVEYLDLDLDS	9606									10068651	YES		lperfetto	Tyrosine phosphorylation of gab2 was induced by stimulation through gp130, il-2r, il-3r, tpor, scfr, and tcr. Gab1 and gab2 were shown to be substrates for shp-2 in vitro.	0.956	SIGNOR-236262
PTPN11	protein	P35235	UNIPROT	ERK1/2	proteinfamily	SIGNOR-PF1	SIGNOR	up-regulates activity				9606									11085989	NO		miannu	We show here that leptin can activate ERK signaling in thehypothalamus and that this stimulation is likely to occur viatwo pathways, both involving SHP-2.We have shown above that SHP-2 is a positive mediator of ERK activation by ObRb and that this requires both the phosphatase activity and tyrosine phosphorylation of SHP-2. Furthermore,Tyr-985 is required for maximal ERK phosphorylation.	0.858	SIGNOR-263499
PTPN1	protein	P35821	UNIPROT	AKT	proteinfamily	SIGNOR-PF24	SIGNOR	down-regulates	dephosphorylation			9606									15632081	YES		gcesareni	Whereas insulin-induced phosphatidylinositol 3-kinase/akt signaling was prolonged in both tcptp-/- and ptp1b-/- immortalized mouse embryo fibroblasts (mefs), mitogen-activated protein kinase erk1/2 signaling was elevated only in ptp1b- mefs	0.711	SIGNOR-132959
PTPN1	protein	P35821	UNIPROT	INSR	protein	P15208	UNIPROT	down-regulates activity	dephosphorylation	Tyr1180	DIYETDYYRKGGKGL	10090	BTO:0000944								11579209	YES		lperfetto	Ptp1b is a protein tyrosine phosphatase that negatively regulates insulin sensitivity by dephosphorylating the insulin receptor.	0.839	SIGNOR-235503
PTPN1	protein	P35821	UNIPROT	IGF1R	protein	Q60751	UNIPROT	down-regulates activity	dephosphorylation			9606									11884589	YES		lperfetto	Ptp-1b can regulate igf-ir kinase activity and function and that loss of ptp-1b can enhance igf-i-mediated cell survival, growth, and motility in transformed cells.	0.891	SIGNOR-115709
PTPN1	protein	P35821	UNIPROT	NFKBIA	protein	Q9Z1E3	UNIPROT	down-regulates	dephosphorylation	Tyr42	DSMKDEEYEQMVKEL	9606									8940099	YES		gcesareni	Ptp1b is able to dephosphorylate phosphorylated-tyr-42 on ikappabalpha	0.375	SIGNOR-45004
CBL	protein	P22682	UNIPROT	PI3K	complex	SIGNOR-C156	SIGNOR	down-regulates	ubiquitination			9606	BTO:0000782								11526404	YES		lperfetto	Cbl-b, a ring-type e3 ubiquitin protein ligase, is implicated in setting the threshold of t lymphocyte activation. The p85 regulatory subunit of phosphatidylinositol 3 kinase (pi3k) was identified as a substrate for cbl-b. We have shown that cbl-b negatively regulated p85 in a proteolysis-independent manner.	0.66	SIGNOR-252668
CBL	protein	P22682	UNIPROT	FLT3	protein	Q00342	UNIPROT	down-regulates activity	binding			10090	BTO:0001516								19276253	YES			Functionally, CBL negatively regulated FMS-like tyrosine kinase 3 (FLT3) activity and interacted with human FLT3 via the autophosphorylation sites Y589 and Y599 and colocalized in vivo.	0.443	SIGNOR-255739
CBL	protein	P22682	UNIPROT	INSR	protein	P15208	UNIPROT	down-regulates	ubiquitination			9606									11498022	YES		gcesareni	Aps couples c-cbl to theinsulinreceptor, resulting in ubiquitination of theinsulinreceptor	0.568	SIGNOR-109688
CBL	protein	P22682	UNIPROT	KIT	protein	P05532	UNIPROT	down-regulates activity	ubiquitination			9606									15315962	YES		miannu	KIT binds to and induces the phosphorylation of Cbl proteins, which in turn act as E3 ligases, mediating the ubiquitination and degradation of KIT and themselves. Tyrosine kinase binding and RING finger domains of Cbl are essential for Cbl-mediated ubiquitination and degradation of KIT.	0.634	SIGNOR-260104
PTEN	protein	O08586	UNIPROT	STAT5A	protein	P42230	UNIPROT	down-regulates	dephosphorylation			9606									20596030	YES		miannu	The forced expression of pten in the eol-1r cells dephosphorylated akt, erk and stat5 /eol-1r cells showed epigenetic silencing of the phosphatase and tensin homolog deleted on chromosome ten (pten) gene. Exposure of eol-1r cells to imatinib failed to dephosphorylate akt, erk and stat5, although pdgfr? Was effectively inactivated. The forced expression of pten negatively regulated these signal pa…	0.419	SIGNOR-166481
PTEN	protein	O08586	UNIPROT	PI3K	complex	SIGNOR-C156	SIGNOR	down-regulates activity				9606	BTO:0000938								18794881	NO		lperfetto	The pten tumour suppressor is a lipid and protein phosphatase that inhibits phosphoinositide 3-kinase (pi3k)-dependent by dephosphorylating phosphatidylinositol 3,4,5-trisphosphate (ptdinsp(3)).	0.657	SIGNOR-252725
PTEN	protein	O08586	UNIPROT	AKT	proteinfamily	SIGNOR-PF24	SIGNOR	down-regulates activity				9606	BTO:0001271								20596030	NO		lperfetto	Exposure of eol-1r cells to imatinib failed to dephosphorylate akt, erk and stat5, although pdgfralpha was effectively inactivated. The forced expression of pten negatively regulated these signal pathways and sensitized eol-1r cells to imatinib.	0.586	SIGNOR-166478
PTEN	protein	O08586	UNIPROT	CREB1	protein	Q01147	UNIPROT	down-regulates activity	dephosphorylation			10090	BTO:0002572								21385900	YES			Our study demonstrates that PTEN can dephosphorylate CREB at Ser133 and that PTEN protein phosphatase activity is required for CREB dephosphoryation.|Moreover, we use both in vitro and in vivo experiments to show PTEN can dephosphorylate CREB in a phosphatase-dependent manner, suggesting that CREB is a substrate of PTEN nuclear phosphatase. Loss of Pten results in an elevated RNA level of multipl…	0.367	SIGNOR-248543
TSC2	protein	Q61037	UNIPROT	MTOR	protein	Q9JLN9	UNIPROT	down-regulates activity				9606	BTO:0000007;BTO:0001938								12271141	NO		lperfetto	These findings strongly implicate the tuberin-hamartin tumor suppressor complex as an inhibitor of mtor	0.819	SIGNOR-93133
TSC2	protein	Q61037	UNIPROT	TSC1	protein	Q9EP53	UNIPROT	up-regulates activity	binding			9606		BTO:0000142;BTO:0000671							10807585	YES		lperfetto	Furthermore, tsc2 is directly phosphorylated by akt, which is involved in stimulating cell growth and is activated by growth stimulating signals, such as insulin. Tsc2 is inactivated by akt-dependent phosphorylation, which destabilizes tsc2 and disrupts its interaction with tsc1.	0.927	SIGNOR-77400
GSK3A	protein	Q2NL51	UNIPROT	TSC2	protein	Q61037	UNIPROT	up-regulates	phosphorylation			9606							phosphorylation:Ser1387	QPLSKSSsSPELQTL	20226003	YES		gcesareni	Gsk3 inhibits the mtor pathway by phosphorylating tsc2 in a manner dependent on ampk-priming phosphorylation.	0.328	SIGNOR-164098
GSK3B	protein	Q9WV60	UNIPROT	TSC2	protein	Q61037	UNIPROT	up-regulates activity	phosphorylation			10116	BTO:0003293								16959574	YES		lperfetto	Gsk3 inhibits the mtor pathway by phosphorylating tsc2 in a manner dependent on ampk-priming phosphorylation.	0.703	SIGNOR-149380
RPS6KA1	protein	P18653	UNIPROT	TSC2	protein	Q61037	UNIPROT	down-regulates	phosphorylation	Ser1805	GQRKRLISSVDDFTE	9606	BTO:0000007								15342917	YES		lperfetto	The mitogen-activated protein kinase (mapk)-activated kinase, p90 ribosomal s6 kinase (rsk) 1, was found to interact with and phosphorylate tuberin at a regulatory site, ser-1798, located at the evolutionarily conserved c terminus of tuberin. Rsk1 phosphorylation of ser-1798 inhibits the tumor suppressor function of the tuberin/hamartin complex, resulting in increased mtor signaling to s6k1	0.725	SIGNOR-128634
ERK1/2	proteinfamily	SIGNOR-PF1	SIGNOR	TSC2	protein	Q61037	UNIPROT	down-regulates	phosphorylation	Ser664	KKASGPLSPPTGPPS	9606									15851026	YES		lperfetto	Here, we show that erk may play a critical role in tsc progression through posttranslational inactivation of tsc2. s664 is the primary erk phosphorylation site on tsc2 in vitro and in vivo	0.2	SIGNOR-244765
AKT	proteinfamily	SIGNOR-PF24	SIGNOR	TSC2	protein	Q61037	UNIPROT	down-regulates activity	phosphorylation	Ser939	SFRARSTSLNERPKS	10090	BTO:0000944								12150915	YES		lperfetto	We demonstrate that, upon activation of PI3K, tuberin is phosphorylated on consensus recognition sites for PI3K-dependent S/T kinases. Moreover, Akt/PKB can phosphorylate tuberin in vitro and in vivo. We also show that S939 and T1462 of tuberin are PI3K-regulated phosphorylation sites and that T1462 is constitutively phosphorylated in PTEN(-/-) tumor-derived cell lines.	0.2	SIGNOR-244369
IGF1	protein	P05017	UNIPROT	IGF1R	protein	Q60751	UNIPROT	up-regulates	binding			9606									19029956	YES		lperfetto	At the cellular level, the ligands IGF1, IGF2 and insulin bind to various members of the insulin receptor (IR) - IGF1 receptor (IGF1R) family.	0.958	SIGNOR-182484
IKBKB	protein	O88351	UNIPROT	TSC1	protein	Q9EP53	UNIPROT	down-regulates	phosphorylation	Ser484	AAISKELSEITTAEA	9606	BTO:0000150								17693255	YES		gcesareni	Here we show that ikkbeta, a major downstream kinase in the tnfalpha signaling pathway, physically interacts with and phosphorylates tsc1 at ser487 and ser511, resulting in suppression of tsc1phosphorylation of tsc2 (by akt and erk;refs. 28, 29) and tsc1(by ikkbeta;ref. 30) results in the disruption of the tsc1/2 complex, and thereby activates the oncogenic mtor signaling contributing to tumor pr…	0.63	SIGNOR-157296
TSC2	protein	Q61037	UNIPROT	TSC1	protein	Q9EP53	UNIPROT	up-regulates activity	binding			9606		BTO:0000142;BTO:0000671							10807585	YES		lperfetto	Furthermore, tsc2 is directly phosphorylated by akt, which is involved in stimulating cell growth and is activated by growth stimulating signals, such as insulin. Tsc2 is inactivated by akt-dependent phosphorylation, which destabilizes tsc2 and disrupts its interaction with tsc1.	0.927	SIGNOR-77400
ERK1/2	proteinfamily	SIGNOR-PF1	SIGNOR	TSC1	protein	Q9EP53	UNIPROT	down-regulates	phosphorylation			9606									15851026	YES		lperfetto	Here, we show that erk may play a critical role in tsc progression through posttranslational inactivation of tsc2. Erk-dependent phosphorylation leads to tsc1-tsc2 dissociation and markedly impairs tsc2 ability to inhibit mtor signalin.	0.2	SIGNOR-244761
AKT	proteinfamily	SIGNOR-PF24	SIGNOR	GSK3A	protein	Q2NL51	UNIPROT	down-regulates	phosphorylation	Ser21	SGRARTSSFAEPGGG	9606									11035810	YES		gcesareni	In response to insulin, gsk3a inhibited by phosphorylation at ser-21 by pkb/akt1;phosphorylation at this site causes a conformational change, preventing access of substrates to the active site.	0.2	SIGNOR-83217
GSK3B	protein	Q9WV60	UNIPROT	PTEN	protein	O08586	UNIPROT	down-regulates activity	phosphorylation	Thr366	ASSSTSVTPDVSDNE	9606									16107342	YES		lperfetto	Gsk3beta Phosphorylates pten at thr-366 in intact cells phosphorylation of pten at thr-366 reduces the activity of pten in cells	0.381	SIGNOR-236641
FLT3	protein	Q00342	UNIPROT	GRB2	protein	Q60631	UNIPROT	up-regulates activity	binding			10090									10080542	YES		gcesareni	FL stimulation induces association of Grb2 with Flt3, SHP-2,and Shc	0.617	SIGNOR-245060
KIT	protein	P05532	UNIPROT	GRB2	protein	Q60631	UNIPROT	up-regulates activity	binding			9606					phosphorylation:Tyr703	DHAEAALyKNLLHSK			10377264	YES		gcesareni	We furthermore demonstrate that the adapter protein Grb2 is a specific binding partner for both phosphorylated Tyr-703 and phosphorylated Tyr-936, whereas the adapter protein Grb7 binds selectively to phosphorylated Tyr-936.	0.656	SIGNOR-248283
SHC1	protein	P98083	UNIPROT	GRB2	protein	Q60631	UNIPROT	up-regulates	binding			9606	BTO:0000776								10207047	YES		lperfetto	The results indicate that ship, shc, and grb2 form a ternary complex in stimulated b cells, with grb2 stabilizing the interaction between shc and ship. The interactions between shc, grb2, and ship are therefore analogous to the interactions between shc, grb2, and sos. Shc and grb2 may help to localize ship to the cell membrane, regulating ship's inhibitory function following bcr stimulation.	0.968	SIGNOR-235881
IRS1	protein	P35569	UNIPROT	GRB2	protein	Q60631	UNIPROT	up-regulates activity	binding			9606	BTO:0000156								11259577	YES		lperfetto	Association ofinsulinreceptor substrate 1 (irs-1) y895 with grb-2 mediates theinsulinsignaling involved in irs-1-deficient brown adipocyte mitogenesis.	0.783	SIGNOR-236614
PTPN11	protein	P35235	UNIPROT	GRB2	protein	Q60631	UNIPROT	up-regulates activity	binding			9606									11085989	YES		miannu	SHP-2 is thus a positive regulator of ERK by leptin receptors, and both the adaptor function and the phosphatase activity of SHP-2 are critical for this regulation. Based on these data, we conclude that tyrosinephosphorylation of SHP-2 is a mediator of ERK activation viaTyr-985. This is likely to occur via Grb-2 binding to SHP-2 atthe C terminus followed by activation of the Ras-Raf pathwayas sug…	0.779	SIGNOR-263498
FLT3	protein	Q00342	UNIPROT	PI3K	complex	SIGNOR-C156	SIGNOR	up-regulates activity				10090	BTO:0001516								23246379	NO		miannu	Grb10 transduces signal from FLT3 by direct interaction with p85 and Ba/F3-FLT3-ITD cells expressing Grb10 exhibits higher STAT5 activation. These results suggest that Grb10 binds to both normal and oncogenic FLT3 and induces PI3K-Akt and STAT5 signaling pathways resulting in an enhanced proliferation, survival and colony formation of hematopoietic cells.	0.548	SIGNOR-260083
FLT3	protein	Q00342	UNIPROT	AKT	proteinfamily	SIGNOR-PF24	SIGNOR	up-regulates activity	phosphorylation			10090	BTO:0001516								14981546	YES			These data confirm previous findings that FLT3 receptors with ITD mutations efficiently trigger the activation of ERK, STAT5 and Akt in the absence of FL stimulation.	0.379	SIGNOR-261522
FLT3	protein	Q00342	UNIPROT	ERK1/2	proteinfamily	SIGNOR-PF1	SIGNOR	up-regulates activity				9606									30552988	NO		miannu	Oncogenic, constitutively active mutants of FLT3 are known to be expressed in acute myeloid leukemia and to correlate with poor prognosis. Activation of the receptor mediates cell survival, cell proliferation and differentiation of cells. Several of the signal transduction pathways downstream of FLT3 have been shown to include various members of the SRC family of kinases (SFKs). They are involved…	0.279	SIGNOR-260132
FLT3	protein	Q00342	UNIPROT	SHC1	protein	P98083	UNIPROT	up-regulates activity	phosphorylation	Tyr423	ELFDDPSYVNIQNLD	9606									10482988	YES		miannu	Intracellular FLT3 signaling involves tyrosine phosphorylation of several cytoplasmic proteins including SHC. We have found that upon FLT3 activation SHC phosphorylation occurs at tyrosine 239/240 and 313.	0.44	SIGNOR-251148
TNF				JNK				up-regulates														NO					manual integration
JNK				STAT3				up-regulates																			manual integration
ERK1/2				STAT3				up-regulates	phosphorylation																		manual integration
MAPK14				CREB1				up-regulates																			manual integration
chemical1				GSK3A				down-regulates																			manual integration
anthra[1,9-cd]pyrazol-6(2H)-one				JNK				down-regulates																			manual integration

## Sheet: FLT3-ITD PKN .sif
Pre-PKN derived from SIGNOR resource in SIF format
AKT	1	IKBKB
FLT3	1	ATM
FLT3	1	MAPK14
AKT	-1	BAD
AKT	-1	BRAF
AKT	-1	CHEK1
AKT	1	CREB1
AKT	-1	FOXOg
AKT	1	MDM2
AP1	1	Proliferation
ATM	1	CHEK1
ATM	1	CHEK2
ATM	-1	CREB1
ATM	1	H2AX
ATM	-1	MDM2
ATM	1	TP53
BAD	1	Apoptosis
BAD	1	TP53
BAX	1	Apoptosis
BAX	-1	BCL2
BCL2	-1	Apoptosis
BRAF	1	MEK1_2
CHEK1	1	RB1
CHEK2	1	RB1
CHEK2	1	TP53
chemical1	-1	GSK3B
CREB1	-1	FOXO
CREB1	1	Proliferation
CTNNB1	1	Proliferation
ERK1_2	1	AP1
ERK1_2	1	BCL2
ERK1_2	-1	GSK3B
ERK1_2	1	MYC
ERK1_2	1	PARP1
ERK1_2	1	RPS6KA1
ERK1_2	1	RPS6KB1
FLT3	1	CTNNB1
FLT3	1	GRB10
FLT3	1	PTPN11
FLT3	1	STAT5A
FOXO	1	Apoptosis
GRB10	1	PI3K
GSK3B	-1	CHEK1
GSK3B	1	CREB1
GSK3B	-1	CTNNB1
GSK3B	-1	MYC
GSK3B	1	NFKB
IKBKB	-1	BAD
IKBKB	-1	FOXO
IKBKB	-1	NFKB
IKBKB	-1	NFKBIA
IKBKB	1	NFKB
JNK	1	AP1
JNK	1	BCL2
KRAS	1	BRAF
KRAS	1	PI3K
KU-55933	-1	ATM
LY2603618	-1	CHEK1
MAPK14	-1	GSK3B
MAPK14	1	MAPKAPK2
MAPK14	-1	MEK1_2
MAPK14	1	STAT3
MAPK14	-1	BCL2
MAPKAPK2	1	CREB1
MDM2	-1	TP53
MEK1_2	1	ERK1_2
MEK1_2	1	GSK3B
MTOR	1	AKT
MTOR	1	MYC
MTOR	1	Proliferation
MTOR	1	RPS6KB1
MTOR	1	STAT3
MYC	1	Proliferation
NFKB	1	Proliferation
NFKBIA	-1	NFKB
olaparib	-1	PARP1
PARP1	1	TP53
PDPK1	1	AKT
PDPK1	1	RPS6KA1
PDPK1	1	RPS6KB1
PI3K	1	PIP3
pimozide	-1	STAT5A
PIP3	1	PDPK1
PTPN11	1	KRAS
RB1	-1	Proliferation
RPS6	1	Proliferation
RPS6KA1	1	CREB1
RPS6KA1	-1	GSK3B
RPS6KA1	1	RPS6
RPS6KB1	1	RPS6
SB203580	-1	MAPK14
Selinexor	-1	XPO1
sirolimus	-1	MTOR
STAT3	1	Proliferation
STAT5A	1	Proliferation
TP53	1	BAX
U0126	-1	MEK1_2
wortmannin	-1	PI3K
XPO1	-1	TP53
FLT3	1	XPO1
XPO1	-1	TP53
TP53	1	Apoptosis
FLT3	1	JNK
TP53	1	CDKN1A
MAPK14	1	CDKN1A
ERK1_2	-1	CDKN1A
AKT	1	CDKN1A
TNF	-1	IRS1
TNF	1	PI3K
TNF	1	MAPK14
TNF	1	NFKB
TNF	1	AKT
TNF	1	TNFRSF1A
TNFRSF1A	1	MAPK14
TNFRSF1A	-1	NFKBIA
IGF1R	1	IRS1
IGF1R	1	PI3K
IGF1R	1	AKT
IGF1R	1	PDPK1
IGF1R	1	SHC1
IRS1	1	GRB2
IRS1	1	PI3K
GSK3A	1	TSC2
GSK3A	-1	MCL1
GSK3A	-1	Grb14
GSK3A	-1	AKT
GSK3A	-1	MYC
MCL1	-1	BAX
INSR	1	IRS1
INSR	1	PI3K
INSR	1	PTPN1
INSR	1	CBL
INSR	1	SHC1
Grb14	-1	INSR
SHC1	1	GRB2
SHC1	1	ERK1_2
SHC1	1	MAPK3
SHC1	1	MAPK1
GRB2	1	SOS1
GRB2	1	GAB1
GRB2	1	GAB2
GRB2	-1	KIT
GRB2	1	CBL
SOS1	1	KRAS
GAB1	1	PI3K
GAB2	1	PI3K
KIT	1	GRB2
KIT	1	PTPN11
KIT	1	PI3K
KIT	1	ERK1_2
PTPN1	-1	IRS1
PTPN1	-1	STAT3
PTPN1	-1	STAT5A
PTPN11	1	GRB2
PTPN11	-1	GAB1
PTPN11	1	ERK1_2
PTPN1	-1	AKT
PTPN1	-1	INSR
PTPN1	-1	NFKBIA
CBL	-1	PI3K
CBL	-1	INSR
CBL	-1	KIT
PTEN	-1	STAT5A
PTEN	-1	PI3K
PTEN	-1	AKT
PTEN	-1	CREB1
TSC2	-1	MTOR
TSC2	1	TSC1
GSK3A	1	TSC2
GSK3B	1	TSC2
RPS6KA1	-1	TSC2
ERK1_2	-1	TSC2
AKT	-1	TSC2
IKBKB	-1	TSC1
TSC2	1	TSC1
ERK1_2	-1	TSC1
AKT	-1	GSK3A
chemical1	-1	GSK3A
anthra[1,9-cd]pyrazol-6(2H)-one	-1	JNK
GSK3B	-1	PTEN
FLT3	1	GRB2
KIT	1	GRB2
SHC1	1	GRB2
IRS1	1	GRB2
PTPN11	1	GRB2
FLT3	1	PI3K
FLT3	1	AKT
FLT3	1	ERK1_2
FLT3	1	SHC1
TNF	1	JNK
JNK	1	STAT3
ERK1_2	1	STAT3
MAPK14	1	CREB1

## Sheet: FLT3 ITD-JMD final PKN .sif
FLT3 ITD-JMD PKN derived from SIGNOR interactions and data-driven approach in SIF format
FLT3	1	MAPK14
AKT	1	CREB1
ERK1_2	-1	GSK3B
ERK1_2	1	RPS6KA1
ERK1_2	1	RPS6KB1
FLT3	1	PTPN11
FLT3	1	STAT5A
GSK3B	1	CREB1
KRAS	1	PI3K
MAPK14	-1	GSK3B
MAPK14	-1	MEK1_2
MAPK14	1	STAT3
MEK1_2	1	ERK1_2
MEK1_2	1	GSK3B
MTOR	1	AKT
MTOR	1	RPS6KB1
MTOR	1	STAT3
PDPK1	1	AKT
PDPK1	1	RPS6KA1
PDPK1	1	RPS6KB1
PTPN11	1	KRAS
RPS6KA1	1	CREB1
RPS6KA1	-1	GSK3B
RPS6KA1	1	RPS6
RPS6KB1	1	RPS6
FLT3	1	JNK
TNF	-1	IRS1
TNF	1	PI3K
TNF	1	MAPK14
TNF	1	AKT
IGF1R	1	IRS1
IGF1R	1	PI3K
IGF1R	1	AKT
IGF1R	1	PDPK1
IGF1R	1	SHC1
IRS1	1	GRB2
IRS1	1	PI3K
GSK3A	1	TSC2
GSK3A	-1	AKT
INSR	1	IRS1
INSR	1	PI3K
INSR	1	PTPN1
INSR	1	CBL
INSR	1	SHC1
SHC1	1	GRB2
SHC1	1	ERK1_2
GRB2	-1	KIT
GRB2	1	CBL
KIT	1	GRB2
KIT	1	PTPN11
KIT	1	PI3K
KIT	1	ERK1_2
PTPN1	-1	IRS1
PTPN1	-1	STAT3
PTPN1	-1	STAT5A
PTPN11	1	GRB2
PTPN11	1	ERK1_2
PTPN1	-1	AKT
PTPN1	-1	INSR
CBL	-1	PI3K
CBL	-1	INSR
CBL	-1	KIT
PTEN	-1	STAT5A
PTEN	-1	PI3K
PTEN	-1	AKT
PTEN	-1	CREB1
TSC2	-1	MTOR
GSK3B	1	TSC2
RPS6KA1	-1	TSC2
ERK1_2	-1	TSC2
AKT	-1	TSC2
AKT	-1	GSK3A
GSK3B	-1	PTEN
FLT3	1	GRB2
FLT3	1	PI3K
FLT3	1	AKT
FLT3	1	ERK1_2
FLT3	1	SHC1
TNF	1	JNK
JNK	1	STAT3
ERK1_2	1	STAT3
MAPK14	1	CREB1
FLT3	-1	CREB1
AKT	-1	MEK1_2
KRAS	1	MEK1_2
PI3K	1	PDPK1
GSK3A	1	INSR
GRB2	1	KRAS
GRB2	1	PI3K
PTPN11	-1	PI3K
MTOR	1	and1
PDPK1	1	and1
and1	1	AKT
MTOR	1	and2
TNF	1	and2
and2	1	AKT
MTOR	1	and3
IGF1R	1	and3
and3	1	AKT
MTOR	1	and4
GSK3A	-1	and4
and4	1	AKT
MTOR	1	and5
PTPN1	-1	and5
and5	1	AKT
MTOR	1	and6
PTEN	-1	and6
and6	1	AKT
FLT3	1	and7
MTOR	1	and7
and7	1	AKT
PDPK1	1	and8
TNF	1	and8
and8	1	AKT
PDPK1	1	and9
IGF1R	1	and9
and9	1	AKT
PDPK1	1	and10
GSK3A	-1	and10
and10	1	AKT
PDPK1	1	and11
PTPN1	-1	and11
and11	1	AKT
PDPK1	1	and12
PTEN	-1	and12
and12	1	AKT
FLT3	1	and13
PDPK1	1	and13
and13	1	AKT
TNF	1	and14
IGF1R	1	and14
and14	1	AKT
TNF	1	and15
GSK3A	-1	and15
and15	1	AKT
TNF	1	and16
PTPN1	-1	and16
and16	1	AKT
TNF	1	and17
PTEN	-1	and17
and17	1	AKT
FLT3	1	and18
TNF	1	and18
and18	1	AKT
IGF1R	1	and19
GSK3A	-1	and19
and19	1	AKT
IGF1R	1	and20
PTPN1	-1	and20
and20	1	AKT
IGF1R	1	and21
PTEN	-1	and21
and21	1	AKT
FLT3	1	and22
IGF1R	1	and22
and22	1	AKT
GSK3A	-1	and23
PTPN1	-1	and23
and23	1	AKT
GSK3A	-1	and24
PTEN	-1	and24
and24	1	AKT
FLT3	1	and25
GSK3A	-1	and25
and25	1	AKT
PTPN1	-1	and26
PTEN	-1	and26
and26	1	AKT
FLT3	1	and27
PTPN1	-1	and27
and27	1	AKT
FLT3	1	and28
PTEN	-1	and28
and28	1	AKT
AKT	1	and29
GSK3B	1	and29
and29	1	CREB1
AKT	1	and30
RPS6KA1	1	and30
and30	1	CREB1
AKT	1	and31
PTEN	-1	and31
and31	1	CREB1
AKT	1	and32
MAPK14	1	and32
and32	1	CREB1
AKT	1	and33
FLT3	-1	and33
and33	1	CREB1
GSK3B	1	and34
RPS6KA1	1	and34
and34	1	CREB1
GSK3B	1	and35
PTEN	-1	and35
and35	1	CREB1
GSK3B	1	and36
MAPK14	1	and36
and36	1	CREB1
FLT3	-1	and37
GSK3B	1	and37
and37	1	CREB1
RPS6KA1	1	and38
PTEN	-1	and38
and38	1	CREB1
MAPK14	1	and39
RPS6KA1	1	and39
and39	1	CREB1
FLT3	-1	and40
RPS6KA1	1	and40
and40	1	CREB1
MAPK14	1	and41
PTEN	-1	and41
and41	1	CREB1
FLT3	-1	and42
PTEN	-1	and42
and42	1	CREB1
FLT3	-1	and43
MAPK14	1	and43
and43	1	CREB1
MEK1_2	1	and44
SHC1	1	and44
and44	1	ERK1_2
MEK1_2	1	and45
KIT	1	and45
and45	1	ERK1_2
MEK1_2	1	and46
PTPN11	1	and46
and46	1	ERK1_2
FLT3	1	and47
MEK1_2	1	and47
and47	1	ERK1_2
SHC1	1	and48
KIT	1	and48
and48	1	ERK1_2
PTPN11	1	and49
SHC1	1	and49
and49	1	ERK1_2
FLT3	1	and50
SHC1	1	and50
and50	1	ERK1_2
PTPN11	1	and51
KIT	1	and51
and51	1	ERK1_2
FLT3	1	and52
KIT	1	and52
and52	1	ERK1_2
FLT3	1	and53
PTPN11	1	and53
and53	1	ERK1_2
ERK1_2	-1	and54
MAPK14	-1	and54
and54	1	GSK3B
ERK1_2	-1	and55
MEK1_2	1	and55
and55	1	GSK3B
ERK1_2	-1	and56
RPS6KA1	-1	and56
and56	1	GSK3B
MAPK14	-1	and57
MEK1_2	1	and57
and57	1	GSK3B
MAPK14	-1	and58
RPS6KA1	-1	and58
and58	1	GSK3B
MEK1_2	1	and59
RPS6KA1	-1	and59
and59	1	GSK3B
FLT3	1	and60
TNF	1	and60
and60	1	JNK
PTPN11	1	and61
GRB2	1	and61
and61	1	KRAS
FLT3	1	and62
TNF	1	and62
and62	1	MAPK14
AKT	-1	and63
MAPK14	-1	and63
and63	1	MEK1_2
KRAS	1	and64
MAPK14	-1	and64
and64	1	MEK1_2
AKT	-1	and65
KRAS	1	and65
and65	1	MEK1_2
PI3K	1	and66
IGF1R	1	and66
and66	1	PDPK1
KRAS	1	and67
TNF	1	and67
and67	1	PI3K
KRAS	1	and68
IGF1R	1	and68
and68	1	PI3K
KRAS	1	and69
IRS1	1	and69
and69	1	PI3K
KRAS	1	and70
INSR	1	and70
and70	1	PI3K
KRAS	1	and71
KIT	1	and71
and71	1	PI3K
KRAS	1	and72
CBL	-1	and72
and72	1	PI3K
KRAS	1	and73
PTEN	-1	and73
and73	1	PI3K
FLT3	1	and74
KRAS	1	and74
and74	1	PI3K
KRAS	1	and75
GRB2	1	and75
and75	1	PI3K
KRAS	1	and76
PTPN11	-1	and76
and76	1	PI3K
TNF	1	and77
IGF1R	1	and77
and77	1	PI3K
TNF	1	and78
IRS1	1	and78
and78	1	PI3K
TNF	1	and79
INSR	1	and79
and79	1	PI3K
TNF	1	and80
KIT	1	and80
and80	1	PI3K
TNF	1	and81
CBL	-1	and81
and81	1	PI3K
TNF	1	and82
PTEN	-1	and82
and82	1	PI3K
FLT3	1	and83
TNF	1	and83
and83	1	PI3K
TNF	1	and84
GRB2	1	and84
and84	1	PI3K
PTPN11	-1	and85
TNF	1	and85
and85	1	PI3K
IGF1R	1	and86
IRS1	1	and86
and86	1	PI3K
IGF1R	1	and87
INSR	1	and87
and87	1	PI3K
IGF1R	1	and88
KIT	1	and88
and88	1	PI3K
IGF1R	1	and89
CBL	-1	and89
and89	1	PI3K
IGF1R	1	and90
PTEN	-1	and90
and90	1	PI3K
FLT3	1	and91
IGF1R	1	and91
and91	1	PI3K
IGF1R	1	and92
GRB2	1	and92
and92	1	PI3K
PTPN11	-1	and93
IGF1R	1	and93
and93	1	PI3K
IRS1	1	and94
INSR	1	and94
and94	1	PI3K
IRS1	1	and95
KIT	1	and95
and95	1	PI3K
IRS1	1	and96
CBL	-1	and96
and96	1	PI3K
IRS1	1	and97
PTEN	-1	and97
and97	1	PI3K
FLT3	1	and98
IRS1	1	and98
and98	1	PI3K
IRS1	1	and99
GRB2	1	and99
and99	1	PI3K
PTPN11	-1	and100
IRS1	1	and100
and100	1	PI3K
INSR	1	and101
KIT	1	and101
and101	1	PI3K
INSR	1	and102
CBL	-1	and102
and102	1	PI3K
INSR	1	and103
PTEN	-1	and103
and103	1	PI3K
FLT3	1	and104
INSR	1	and104
and104	1	PI3K
INSR	1	and105
GRB2	1	and105
and105	1	PI3K
PTPN11	-1	and106
INSR	1	and106
and106	1	PI3K
KIT	1	and107
CBL	-1	and107
and107	1	PI3K
KIT	1	and108
PTEN	-1	and108
and108	1	PI3K
FLT3	1	and109
KIT	1	and109
and109	1	PI3K
GRB2	1	and110
KIT	1	and110
and110	1	PI3K
PTPN11	-1	and111
KIT	1	and111
and111	1	PI3K
CBL	-1	and112
PTEN	-1	and112
and112	1	PI3K
FLT3	1	and113
CBL	-1	and113
and113	1	PI3K
GRB2	1	and114
CBL	-1	and114
and114	1	PI3K
PTPN11	-1	and115
CBL	-1	and115
and115	1	PI3K
FLT3	1	and116
PTEN	-1	and116
and116	1	PI3K
GRB2	1	and117
PTEN	-1	and117
and117	1	PI3K
PTPN11	-1	and118
PTEN	-1	and118
and118	1	PI3K
FLT3	1	and119
GRB2	1	and119
and119	1	PI3K
FLT3	1	and120
PTPN11	-1	and120
and120	1	PI3K
PTPN11	-1	and121
GRB2	1	and121
and121	1	PI3K
FLT3	1	and122
KIT	1	and122
and122	1	PTPN11
RPS6KA1	1	and123
RPS6KB1	1	and123
and123	1	RPS6
ERK1_2	1	and124
PDPK1	1	and124
and124	1	RPS6KA1
ERK1_2	1	and125
MTOR	1	and125
and125	1	RPS6KB1
ERK1_2	1	and126
PDPK1	1	and126
and126	1	RPS6KB1
MTOR	1	and127
PDPK1	1	and127
and127	1	RPS6KB1
MAPK14	1	and128
MTOR	1	and128
and128	1	STAT3
MAPK14	1	and129
PTPN1	-1	and129
and129	1	STAT3
JNK	1	and130
MAPK14	1	and130
and130	1	STAT3
ERK1_2	1	and131
MAPK14	1	and131
and131	1	STAT3
MTOR	1	and132
PTPN1	-1	and132
and132	1	STAT3
JNK	1	and133
MTOR	1	and133
and133	1	STAT3
ERK1_2	1	and134
MTOR	1	and134
and134	1	STAT3
JNK	1	and135
PTPN1	-1	and135
and135	1	STAT3
ERK1_2	1	and136
PTPN1	-1	and136
and136	1	STAT3
ERK1_2	1	and137
JNK	1	and137
and137	1	STAT3
FLT3	1	and138
PTPN1	-1	and138
and138	1	STAT5A
FLT3	1	and139
PTEN	-1	and139
and139	1	STAT5A
PTPN1	-1	and140
PTEN	-1	and140
and140	1	STAT5A
TNF	-1	and141
IGF1R	1	and141
and141	1	IRS1
TNF	-1	and142
INSR	1	and142
and142	1	IRS1
TNF	-1	and143
PTPN1	-1	and143
and143	1	IRS1
IGF1R	1	and144
INSR	1	and144
and144	1	IRS1
IGF1R	1	and145
PTPN1	-1	and145
and145	1	IRS1
INSR	1	and146
PTPN1	-1	and146
and146	1	IRS1
PTPN1	-1	and147
CBL	-1	and147
and147	1	INSR
GSK3A	1	and148
PTPN1	-1	and148
and148	1	INSR
GSK3A	1	and149
CBL	-1	and149
and149	1	INSR
IGF1R	1	and150
INSR	1	and150
and150	1	SHC1
FLT3	1	and151
IGF1R	1	and151
and151	1	SHC1
FLT3	1	and152
INSR	1	and152
and152	1	SHC1
IRS1	1	and153
SHC1	1	and153
and153	1	GRB2
IRS1	1	and154
KIT	1	and154
and154	1	GRB2
PTPN11	1	and155
IRS1	1	and155
and155	1	GRB2
FLT3	1	and156
IRS1	1	and156
and156	1	GRB2
SHC1	1	and157
KIT	1	and157
and157	1	GRB2
PTPN11	1	and158
SHC1	1	and158
and158	1	GRB2
FLT3	1	and159
SHC1	1	and159
and159	1	GRB2
PTPN11	1	and160
KIT	1	and160
and160	1	GRB2
FLT3	1	and161
KIT	1	and161
and161	1	GRB2
FLT3	1	and162
PTPN11	1	and162
and162	1	GRB2
GRB2	-1	and163
CBL	-1	and163
and163	1	KIT
INSR	1	and164
GRB2	1	and164
and164	1	CBL
GSK3B	1	and165
GSK3A	1	and165
and165	1	TSC2
RPS6KA1	-1	and166
GSK3A	1	and166
and166	1	TSC2
ERK1_2	-1	and167
GSK3A	1	and167
and167	1	TSC2
AKT	-1	and168
GSK3A	1	and168
and168	1	TSC2
GSK3B	1	and169
RPS6KA1	-1	and169
and169	1	TSC2
ERK1_2	-1	and170
GSK3B	1	and170
and170	1	TSC2
AKT	-1	and171
GSK3B	1	and171
and171	1	TSC2
ERK1_2	-1	and172
RPS6KA1	-1	and172
and172	1	TSC2
AKT	-1	and173
RPS6KA1	-1	and173
and173	1	TSC2
AKT	-1	and174
ERK1_2	-1	and174
and174	1	TSC2
TNF	-1	FLT3
MAPK14	1	and175
IGF1R	-1	and175
and175	1	CREB1
JNK	-1	CREB1
JNK	-1	FLT3
STAT3	-1	CREB1
STAT3	-1	FLT3
IGF1R	1	FLT3
PI3K	-1	MAPK14
PI3K	-1	FLT3
IGF1R	1	MTOR
MTOR	-1	MAPK14
MTOR	-1	FLT3
RPS6KB1	-1	MAPK14
RPS6KB1	-1	FLT3
STAT3	-1	MAPK14
RPS6	-1	MAPK14
RPS6	-1	FLT3
MTOR	1	and176
TNF	-1	and176
and176	1	MAPK14
IGF1R	1	MEK1_2
MEK1_2	-1	MAPK14
MEK1_2	-1	FLT3
ERK1_2	-1	MAPK14
ERK1_2	-1	FLT3
TSC2	-1	MAPK14
TSC2	-1	FLT3
TNF	1	FLT3
MAPK14	-1	ERK1_2
MAPK14	-1	FLT3
STAT3	-1	ERK1_2
CREB1	-1	ERK1_2
CREB1	-1	FLT3
JNK	1	ERK1_2
JNK	1	FLT3
STAT3	1	ERK1_2
STAT3	1	FLT3
PI3K	-1	ERK1_2
PI3K	-1	MEK1_2
IGF1R	-1	MTOR
MTOR	-1	ERK1_2
MTOR	-1	MEK1_2
RPS6KB1	-1	ERK1_2
RPS6KB1	-1	MEK1_2
STAT3	-1	MEK1_2
RPS6	-1	ERK1_2
RPS6	-1	MEK1_2
PI3K	1	STAT3
MAPK14	1	STAT5A
MAPK14	1	FLT3
STAT3	1	STAT5A
CREB1	1	STAT5A
CREB1	1	FLT3
JNK	1	STAT5A
PI3K	-1	STAT5A
MTOR	1	STAT5A
MTOR	1	FLT3
RPS6KB1	1	STAT5A
RPS6KB1	1	FLT3
RPS6	1	STAT5A
RPS6	1	FLT3
MEK1_2	1	STAT5A
MEK1_2	1	FLT3
ERK1_2	1	STAT5A
ERK1_2	1	FLT3
TSC2	1	STAT5A
TSC2	1	FLT3
JNK	1	GSK3B
STAT3	1	GSK3B
PI3K	1	GSK3B
PI3K	1	MEK1_2
MTOR	1	GSK3B
MTOR	1	MEK1_2
RPS6KB1	1	GSK3B
RPS6KB1	1	MEK1_2
STAT3	1	MEK1_2
RPS6	1	GSK3B
RPS6	1	MEK1_2
IGF1R	1	GSK3B
IGF1R	1	GSK3A
MAPK14	1	MTOR
STAT3	1	MTOR
CREB1	1	MTOR
JNK	1	MTOR
PI3K	1	MTOR
MAPK14	1	RPS6KB1
STAT3	1	RPS6KB1
CREB1	1	RPS6KB1
JNK	1	RPS6KB1
PI3K	1	RPS6KB1
FLT3	1	PTEN
STAT5A	1	PTEN
ERK1_2	1	PTEN
CREB1	1	PTEN
RPS6KB1	1	PTEN
TSC2	1	PTEN
STAT3	1	PTEN
RPS6	1	PTEN
MAPK14	1	PTEN
JNK	-1	PTEN
STAT3	-1	PTEN
IGF1R	-1	FLT3
FLT3	-1	PTEN
STAT5A	-1	PTEN
ERK1_2	-1	PTEN
CREB1	-1	PTEN
RPS6KB1	-1	PTEN
TSC2	-1	PTEN
RPS6	-1	PTEN
PI3K	-1	PTEN
MTOR	-1	PTEN
IGF1R	-1	MEK1_2
MEK1_2	-1	PTEN
FLT3	1	GSK3A
STAT5A	1	GSK3A
ERK1_2	1	GSK3A
CREB1	1	GSK3A
RPS6KB1	1	GSK3A
TSC2	1	GSK3A
STAT3	1	GSK3A
RPS6	1	GSK3A
MAPK14	1	GSK3A
JNK	1	GSK3A
PI3K	1	GSK3A
MTOR	1	GSK3A
MEK1_2	1	GSK3A
GSK3B	1	GSK3A
PTEN	1	GSK3A
MAPK14	-1	TSC2
STAT3	-1	TSC2
CREB1	-1	TSC2
JNK	1	TSC2
STAT3	1	TSC2
PI3K	1	TSC2
MTOR	1	TSC2
RPS6KB1	1	TSC2
RPS6	1	TSC2
MAPK14	1	RPS6
STAT3	1	RPS6
CREB1	1	RPS6
JNK	1	RPS6
PI3K	1	RPS6

## Sheet: FLT3 ITD-TKD final PKN .sif
FLT3 ITD-TKD PKN derived from SIGNOR interactions and data-driven approach in SIF format
FLT3	1	MAPK14
AKT	1	CREB1
ERK1_2	-1	GSK3B
ERK1_2	1	RPS6KA1
ERK1_2	1	RPS6KB1
FLT3	1	PTPN11
FLT3	1	STAT5A
GSK3B	1	CREB1
KRAS	1	PI3K
MAPK14	-1	GSK3B
MAPK14	-1	MEK1_2
MAPK14	1	STAT3
MEK1_2	1	ERK1_2
MEK1_2	1	GSK3B
MTOR	1	AKT
MTOR	1	RPS6KB1
MTOR	1	STAT3
PDPK1	1	AKT
PDPK1	1	RPS6KA1
PDPK1	1	RPS6KB1
PTPN11	1	KRAS
RPS6KA1	1	CREB1
RPS6KA1	-1	GSK3B
RPS6KA1	1	RPS6
RPS6KB1	1	RPS6
FLT3	1	JNK
TNF	-1	IRS1
TNF	1	PI3K
TNF	1	MAPK14
TNF	1	AKT
IGF1R	1	IRS1
IGF1R	1	PI3K
IGF1R	1	AKT
IGF1R	1	PDPK1
IGF1R	1	SHC1
IRS1	1	GRB2
IRS1	1	PI3K
GSK3A	1	TSC2
GSK3A	-1	AKT
INSR	1	IRS1
INSR	1	PI3K
INSR	1	PTPN1
INSR	1	CBL
INSR	1	SHC1
SHC1	1	GRB2
SHC1	1	ERK1_2
GRB2	-1	KIT
GRB2	1	CBL
KIT	1	GRB2
KIT	1	PTPN11
KIT	1	PI3K
KIT	1	ERK1_2
PTPN1	-1	IRS1
PTPN1	-1	STAT3
PTPN1	-1	STAT5A
PTPN11	1	GRB2
PTPN11	1	ERK1_2
PTPN1	-1	AKT
PTPN1	-1	INSR
CBL	-1	PI3K
CBL	-1	INSR
CBL	-1	KIT
PTEN	-1	STAT5A
PTEN	-1	PI3K
PTEN	-1	AKT
PTEN	-1	CREB1
TSC2	-1	MTOR
GSK3B	1	TSC2
RPS6KA1	-1	TSC2
ERK1_2	-1	TSC2
AKT	-1	TSC2
AKT	-1	GSK3A
GSK3B	-1	PTEN
FLT3	1	GRB2
FLT3	1	PI3K
FLT3	1	AKT
FLT3	1	ERK1_2
FLT3	1	SHC1
TNF	1	JNK
JNK	1	STAT3
ERK1_2	1	STAT3
MAPK14	1	CREB1
FLT3	-1	CREB1
AKT	-1	MEK1_2
KRAS	1	MEK1_2
PI3K	1	PDPK1
GSK3A	1	INSR
GRB2	1	KRAS
GRB2	1	PI3K
PTPN11	-1	PI3K
MTOR	1	and1
PDPK1	1	and1
and1	1	AKT
MTOR	1	and2
TNF	1	and2
and2	1	AKT
MTOR	1	and3
IGF1R	1	and3
and3	1	AKT
MTOR	1	and4
GSK3A	-1	and4
and4	1	AKT
MTOR	1	and5
PTPN1	-1	and5
and5	1	AKT
MTOR	1	and6
PTEN	-1	and6
and6	1	AKT
FLT3	1	and7
MTOR	1	and7
and7	1	AKT
PDPK1	1	and8
TNF	1	and8
and8	1	AKT
PDPK1	1	and9
IGF1R	1	and9
and9	1	AKT
PDPK1	1	and10
GSK3A	-1	and10
and10	1	AKT
PDPK1	1	and11
PTPN1	-1	and11
and11	1	AKT
PDPK1	1	and12
PTEN	-1	and12
and12	1	AKT
FLT3	1	and13
PDPK1	1	and13
and13	1	AKT
TNF	1	and14
IGF1R	1	and14
and14	1	AKT
TNF	1	and15
GSK3A	-1	and15
and15	1	AKT
TNF	1	and16
PTPN1	-1	and16
and16	1	AKT
TNF	1	and17
PTEN	-1	and17
and17	1	AKT
FLT3	1	and18
TNF	1	and18
and18	1	AKT
IGF1R	1	and19
GSK3A	-1	and19
and19	1	AKT
IGF1R	1	and20
PTPN1	-1	and20
and20	1	AKT
IGF1R	1	and21
PTEN	-1	and21
and21	1	AKT
FLT3	1	and22
IGF1R	1	and22
and22	1	AKT
GSK3A	-1	and23
PTPN1	-1	and23
and23	1	AKT
GSK3A	-1	and24
PTEN	-1	and24
and24	1	AKT
FLT3	1	and25
GSK3A	-1	and25
and25	1	AKT
PTPN1	-1	and26
PTEN	-1	and26
and26	1	AKT
FLT3	1	and27
PTPN1	-1	and27
and27	1	AKT
FLT3	1	and28
PTEN	-1	and28
and28	1	AKT
AKT	1	and29
GSK3B	1	and29
and29	1	CREB1
AKT	1	and30
RPS6KA1	1	and30
and30	1	CREB1
AKT	1	and31
PTEN	-1	and31
and31	1	CREB1
AKT	1	and32
MAPK14	1	and32
and32	1	CREB1
AKT	1	and33
FLT3	-1	and33
and33	1	CREB1
GSK3B	1	and34
RPS6KA1	1	and34
and34	1	CREB1
GSK3B	1	and35
PTEN	-1	and35
and35	1	CREB1
GSK3B	1	and36
MAPK14	1	and36
and36	1	CREB1
FLT3	-1	and37
GSK3B	1	and37
and37	1	CREB1
RPS6KA1	1	and38
PTEN	-1	and38
and38	1	CREB1
MAPK14	1	and39
RPS6KA1	1	and39
and39	1	CREB1
FLT3	-1	and40
RPS6KA1	1	and40
and40	1	CREB1
MAPK14	1	and41
PTEN	-1	and41
and41	1	CREB1
FLT3	-1	and42
PTEN	-1	and42
and42	1	CREB1
FLT3	-1	and43
MAPK14	1	and43
and43	1	CREB1
MEK1_2	1	and44
SHC1	1	and44
and44	1	ERK1_2
MEK1_2	1	and45
KIT	1	and45
and45	1	ERK1_2
MEK1_2	1	and46
PTPN11	1	and46
and46	1	ERK1_2
FLT3	1	and47
MEK1_2	1	and47
and47	1	ERK1_2
SHC1	1	and48
KIT	1	and48
and48	1	ERK1_2
PTPN11	1	and49
SHC1	1	and49
and49	1	ERK1_2
FLT3	1	and50
SHC1	1	and50
and50	1	ERK1_2
PTPN11	1	and51
KIT	1	and51
and51	1	ERK1_2
FLT3	1	and52
KIT	1	and52
and52	1	ERK1_2
FLT3	1	and53
PTPN11	1	and53
and53	1	ERK1_2
ERK1_2	-1	and54
MAPK14	-1	and54
and54	1	GSK3B
ERK1_2	-1	and55
MEK1_2	1	and55
and55	1	GSK3B
ERK1_2	-1	and56
RPS6KA1	-1	and56
and56	1	GSK3B
MAPK14	-1	and57
MEK1_2	1	and57
and57	1	GSK3B
MAPK14	-1	and58
RPS6KA1	-1	and58
and58	1	GSK3B
MEK1_2	1	and59
RPS6KA1	-1	and59
and59	1	GSK3B
FLT3	1	and60
TNF	1	and60
and60	1	JNK
PTPN11	1	and61
GRB2	1	and61
and61	1	KRAS
FLT3	1	and62
TNF	1	and62
and62	1	MAPK14
AKT	-1	and63
MAPK14	-1	and63
and63	1	MEK1_2
KRAS	1	and64
MAPK14	-1	and64
and64	1	MEK1_2
AKT	-1	and65
KRAS	1	and65
and65	1	MEK1_2
PI3K	1	and66
IGF1R	1	and66
and66	1	PDPK1
KRAS	1	and67
TNF	1	and67
and67	1	PI3K
KRAS	1	and68
IGF1R	1	and68
and68	1	PI3K
KRAS	1	and69
IRS1	1	and69
and69	1	PI3K
KRAS	1	and70
INSR	1	and70
and70	1	PI3K
KRAS	1	and71
KIT	1	and71
and71	1	PI3K
KRAS	1	and72
CBL	-1	and72
and72	1	PI3K
KRAS	1	and73
PTEN	-1	and73
and73	1	PI3K
FLT3	1	and74
KRAS	1	and74
and74	1	PI3K
KRAS	1	and75
GRB2	1	and75
and75	1	PI3K
KRAS	1	and76
PTPN11	-1	and76
and76	1	PI3K
TNF	1	and77
IGF1R	1	and77
and77	1	PI3K
TNF	1	and78
IRS1	1	and78
and78	1	PI3K
TNF	1	and79
INSR	1	and79
and79	1	PI3K
TNF	1	and80
KIT	1	and80
and80	1	PI3K
TNF	1	and81
CBL	-1	and81
and81	1	PI3K
TNF	1	and82
PTEN	-1	and82
and82	1	PI3K
FLT3	1	and83
TNF	1	and83
and83	1	PI3K
TNF	1	and84
GRB2	1	and84
and84	1	PI3K
PTPN11	-1	and85
TNF	1	and85
and85	1	PI3K
IGF1R	1	and86
IRS1	1	and86
and86	1	PI3K
IGF1R	1	and87
INSR	1	and87
and87	1	PI3K
IGF1R	1	and88
KIT	1	and88
and88	1	PI3K
IGF1R	1	and89
CBL	-1	and89
and89	1	PI3K
IGF1R	1	and90
PTEN	-1	and90
and90	1	PI3K
FLT3	1	and91
IGF1R	1	and91
and91	1	PI3K
IGF1R	1	and92
GRB2	1	and92
and92	1	PI3K
PTPN11	-1	and93
IGF1R	1	and93
and93	1	PI3K
IRS1	1	and94
INSR	1	and94
and94	1	PI3K
IRS1	1	and95
KIT	1	and95
and95	1	PI3K
IRS1	1	and96
CBL	-1	and96
and96	1	PI3K
IRS1	1	and97
PTEN	-1	and97
and97	1	PI3K
FLT3	1	and98
IRS1	1	and98
and98	1	PI3K
IRS1	1	and99
GRB2	1	and99
and99	1	PI3K
PTPN11	-1	and100
IRS1	1	and100
and100	1	PI3K
INSR	1	and101
KIT	1	and101
and101	1	PI3K
INSR	1	and102
CBL	-1	and102
and102	1	PI3K
INSR	1	and103
PTEN	-1	and103
and103	1	PI3K
FLT3	1	and104
INSR	1	and104
and104	1	PI3K
INSR	1	and105
GRB2	1	and105
and105	1	PI3K
PTPN11	-1	and106
INSR	1	and106
and106	1	PI3K
KIT	1	and107
CBL	-1	and107
and107	1	PI3K
KIT	1	and108
PTEN	-1	and108
and108	1	PI3K
FLT3	1	and109
KIT	1	and109
and109	1	PI3K
GRB2	1	and110
KIT	1	and110
and110	1	PI3K
PTPN11	-1	and111
KIT	1	and111
and111	1	PI3K
CBL	-1	and112
PTEN	-1	and112
and112	1	PI3K
FLT3	1	and113
CBL	-1	and113
and113	1	PI3K
GRB2	1	and114
CBL	-1	and114
and114	1	PI3K
PTPN11	-1	and115
CBL	-1	and115
and115	1	PI3K
FLT3	1	and116
PTEN	-1	and116
and116	1	PI3K
GRB2	1	and117
PTEN	-1	and117
and117	1	PI3K
PTPN11	-1	and118
PTEN	-1	and118
and118	1	PI3K
FLT3	1	and119
GRB2	1	and119
and119	1	PI3K
FLT3	1	and120
PTPN11	-1	and120
and120	1	PI3K
PTPN11	-1	and121
GRB2	1	and121
and121	1	PI3K
FLT3	1	and122
KIT	1	and122
and122	1	PTPN11
RPS6KA1	1	and123
RPS6KB1	1	and123
and123	1	RPS6
ERK1_2	1	and124
PDPK1	1	and124
and124	1	RPS6KA1
ERK1_2	1	and125
MTOR	1	and125
and125	1	RPS6KB1
ERK1_2	1	and126
PDPK1	1	and126
and126	1	RPS6KB1
MTOR	1	and127
PDPK1	1	and127
and127	1	RPS6KB1
MAPK14	1	and128
MTOR	1	and128
and128	1	STAT3
MAPK14	1	and129
PTPN1	-1	and129
and129	1	STAT3
JNK	1	and130
MAPK14	1	and130
and130	1	STAT3
ERK1_2	1	and131
MAPK14	1	and131
and131	1	STAT3
MTOR	1	and132
PTPN1	-1	and132
and132	1	STAT3
JNK	1	and133
MTOR	1	and133
and133	1	STAT3
ERK1_2	1	and134
MTOR	1	and134
and134	1	STAT3
JNK	1	and135
PTPN1	-1	and135
and135	1	STAT3
ERK1_2	1	and136
PTPN1	-1	and136
and136	1	STAT3
ERK1_2	1	and137
JNK	1	and137
and137	1	STAT3
FLT3	1	and138
PTPN1	-1	and138
and138	1	STAT5A
FLT3	1	and139
PTEN	-1	and139
and139	1	STAT5A
PTPN1	-1	and140
PTEN	-1	and140
and140	1	STAT5A
TNF	-1	and141
IGF1R	1	and141
and141	1	IRS1
TNF	-1	and142
INSR	1	and142
and142	1	IRS1
TNF	-1	and143
PTPN1	-1	and143
and143	1	IRS1
IGF1R	1	and144
INSR	1	and144
and144	1	IRS1
IGF1R	1	and145
PTPN1	-1	and145
and145	1	IRS1
INSR	1	and146
PTPN1	-1	and146
and146	1	IRS1
PTPN1	-1	and147
CBL	-1	and147
and147	1	INSR
GSK3A	1	and148
PTPN1	-1	and148
and148	1	INSR
GSK3A	1	and149
CBL	-1	and149
and149	1	INSR
IGF1R	1	and150
INSR	1	and150
and150	1	SHC1
FLT3	1	and151
IGF1R	1	and151
and151	1	SHC1
FLT3	1	and152
INSR	1	and152
and152	1	SHC1
IRS1	1	and153
SHC1	1	and153
and153	1	GRB2
IRS1	1	and154
KIT	1	and154
and154	1	GRB2
PTPN11	1	and155
IRS1	1	and155
and155	1	GRB2
FLT3	1	and156
IRS1	1	and156
and156	1	GRB2
SHC1	1	and157
KIT	1	and157
and157	1	GRB2
PTPN11	1	and158
SHC1	1	and158
and158	1	GRB2
FLT3	1	and159
SHC1	1	and159
and159	1	GRB2
PTPN11	1	and160
KIT	1	and160
and160	1	GRB2
FLT3	1	and161
KIT	1	and161
and161	1	GRB2
FLT3	1	and162
PTPN11	1	and162
and162	1	GRB2
GRB2	-1	and163
CBL	-1	and163
and163	1	KIT
INSR	1	and164
GRB2	1	and164
and164	1	CBL
GSK3B	1	and165
GSK3A	1	and165
and165	1	TSC2
RPS6KA1	-1	and166
GSK3A	1	and166
and166	1	TSC2
ERK1_2	-1	and167
GSK3A	1	and167
and167	1	TSC2
AKT	-1	and168
GSK3A	1	and168
and168	1	TSC2
GSK3B	1	and169
RPS6KA1	-1	and169
and169	1	TSC2
ERK1_2	-1	and170
GSK3B	1	and170
and170	1	TSC2
AKT	-1	and171
GSK3B	1	and171
and171	1	TSC2
ERK1_2	-1	and172
RPS6KA1	-1	and172
and172	1	TSC2
AKT	-1	and173
RPS6KA1	-1	and173
and173	1	TSC2
AKT	-1	and174
ERK1_2	-1	and174
and174	1	TSC2
TNF	-1	FLT3
JNK	-1	CREB1
JNK	-1	FLT3
STAT3	-1	CREB1
STAT3	-1	FLT3
IGF1R	1	FLT3
PI3K	1	CREB1
PI3K	1	FLT3
IGF1R	1	MTOR
MTOR	1	CREB1
MTOR	1	FLT3
RPS6KB1	1	CREB1
RPS6KB1	1	FLT3
STAT3	1	CREB1
STAT3	1	FLT3
RPS6	1	CREB1
RPS6	1	FLT3
IGF1R	1	MEK1_2
MEK1_2	1	CREB1
MEK1_2	1	FLT3
ERK1_2	1	CREB1
ERK1_2	1	FLT3
TSC2	1	CREB1
TSC2	1	FLT3
PI3K	-1	MAPK14
PI3K	-1	FLT3
MTOR	-1	MAPK14
MTOR	-1	FLT3
RPS6KB1	-1	MAPK14
RPS6KB1	-1	FLT3
STAT3	-1	MAPK14
RPS6	-1	MAPK14
RPS6	-1	FLT3
MTOR	1	and175
TNF	-1	and175
and175	1	MAPK14
MEK1_2	-1	MAPK14
MEK1_2	-1	FLT3
ERK1_2	-1	MAPK14
ERK1_2	-1	FLT3
TSC2	-1	MAPK14
TSC2	-1	FLT3
TNF	1	FLT3
MAPK14	-1	ERK1_2
MAPK14	-1	FLT3
STAT3	-1	ERK1_2
CREB1	-1	ERK1_2
CREB1	-1	FLT3
JNK	1	ERK1_2
JNK	1	FLT3
STAT3	1	ERK1_2
PI3K	1	ERK1_2
PI3K	1	MEK1_2
MTOR	1	ERK1_2
MTOR	1	MEK1_2
RPS6KB1	1	ERK1_2
RPS6KB1	1	MEK1_2
STAT3	1	MEK1_2
RPS6	1	ERK1_2
RPS6	1	MEK1_2
PI3K	1	STAT3
MAPK14	1	STAT5A
MAPK14	1	FLT3
STAT3	1	STAT5A
CREB1	1	STAT5A
CREB1	1	FLT3
JNK	1	STAT5A
PI3K	1	STAT5A
MTOR	1	STAT5A
RPS6KB1	1	STAT5A
RPS6	1	STAT5A
MEK1_2	1	STAT5A
ERK1_2	1	STAT5A
TSC2	1	STAT5A
JNK	1	GSK3B
STAT3	1	GSK3B
PI3K	1	GSK3B
MTOR	1	GSK3B
RPS6KB1	1	GSK3B
RPS6	1	GSK3B
IGF1R	1	GSK3A
GSK3A	1	GSK3B
GSK3A	1	MEK1_2
TSC2	1	GSK3B
TSC2	1	MEK1_2

## Sheet: ProxPath phenotypes table
Table represeting the regulators of phenotypes annotated by ProxPath resource.
EndPathways	QueryNode	EndNode	Path_String	relations_path	Path_Score	Path_Length	Final_Effect	Effect	n	mean(Path_Score)	sd	zscore
APOPTOSIS	STAT5A	APOPTOSIS	STAT5A--|APOPTOSIS	SIGNOR-256583	0.3	1	-1	down-regulates	69091	1.80432	0.715249	-2.10322
APOPTOSIS	MTOR	APOPTOSIS	MTOR-->AKT--|APOPTOSIS	SIGNOR-244417;SIGNOR-260215	0.377	2	-1	down-regulates	69091	1.80432	0.715249	-1.99556
APOPTOSIS	JNK	APOPTOSIS	JNK-->APOPTOSIS	SIGNOR-260178	0.3	1	1	up-regulates	69091	1.80432	0.715249	-2.10322
APOPTOSIS	AKT	APOPTOSIS	AKT--|FOXO-->APOPTOSIS	SIGNOR-252820;SIGNOR-252939	0.401	2	-1	down-regulates	69091	1.80432	0.715249	-1.96201
APOPTOSIS	AKT	APOPTOSIS	AKT--|APOPTOSIS	SIGNOR-260215	0.3	1	-1	down-regulates	69091	1.80432	0.715249	-2.10322
DIFFERENTIATION	ERK1/2	DIFFERENTIATION	ERK1/2-->DIFFERENTIATION	SIGNOR-254355	0.3	1	1	up-regulates	38270	2.00572	0.866597	-1.96829
PROLIFERATION	MTOR	PROLIFERATION	MTOR--[]MTORC1-->PROLIFERATION	SIGNOR-205615;SIGNOR-256064	0.409	2	1	up-regulates	98939	1.72465	0.643504	-2.04451
PROLIFERATION	MTOR	PROLIFERATION	MTOR-->AKT-->PROLIFERATION	SIGNOR-244417;SIGNOR-257606	0.377	2	1	up-regulates	98939	1.72465	0.643504	-2.09424
PROLIFERATION	ERK1/2	PROLIFERATION	ERK1/2-->PROLIFERATION	SIGNOR-254354	0.3	1	1	up-regulates	98939	1.72465	0.643504	-2.2139
PROLIFERATION	RPS6KB1	PROLIFERATION	RPS6KB1--|MTOR-->AKT1-->PROLIFERATION	SIGNOR-102051;SIGNOR-170604;SIGNOR-254372	0.417	3	-1	down-regulates	98939	1.72465	0.643504	-2.03208
PROLIFERATION	MTOR	PROLIFERATION	MTOR-->AKT1-->PROLIFERATION	SIGNOR-170604;SIGNOR-254372	0.377	2	1	up-regulates	98939	1.72465	0.643504	-2.09424
PROLIFERATION	STAT3	PROLIFERATION	STAT3-->PROLIFERATION	SIGNOR-255632	0.3	1	1	up-regulates	98939	1.72465	0.643504	-2.2139
PROLIFERATION	STAT5A	PROLIFERATION	STAT5A-->PROLIFERATION	SIGNOR-256233	0.3	1	1	up-regulates	98939	1.72465	0.643504	-2.2139
PROLIFERATION	KRAS	PROLIFERATION	KRAS-->PIK3CA--[]PI3K-->PROLIFERATION	SIGNOR-175204;SIGNOR-255299;SIGNOR-255577	0.453	3	1	up-regulates	98939	1.72465	0.643504	-1.97613
PROLIFERATION	MTOR	PROLIFERATION	MTOR-->PROLIFERATION	SIGNOR-255944	0.3	1	1	up-regulates	98939	1.72465	0.643504	-2.2139
PROLIFERATION	TSC2	PROLIFERATION	TSC2--|RHEB-->MTOR-->PROLIFERATION	SIGNOR-128432;SIGNOR-135770;SIGNOR-255944	0.436	3	-1	down-regulates	98939	1.72465	0.643504	-2.00255
PROLIFERATION	GSK3B	PROLIFERATION	GSK3B--|CTNNB1-->PROLIFERATION	SIGNOR-141799;SIGNOR-255695	0.459	2	-1	down-regulates	98939	1.72465	0.643504	-1.96681
PROLIFERATION	AKT	PROLIFERATION	AKT--|FOXO--|PROLIFERATION	SIGNOR-252820;SIGNOR-252938	0.401	2	1	up-regulates	98939	1.72465	0.643504	-2.05694
PROLIFERATION	RPS6KB1	PROLIFERATION	RPS6KB1--|MTOR--[]MTORC1-->PROLIFERATION	SIGNOR-102051;SIGNOR-205615;SIGNOR-256064	0.449	3	-1	down-regulates	98939	1.72465	0.643504	-1.98235
PROLIFERATION	RPS6KB1	PROLIFERATION	RPS6KB1--|MTOR-->AKT-->PROLIFERATION	SIGNOR-102051;SIGNOR-244417;SIGNOR-257606	0.417	3	-1	down-regulates	98939	1.72465	0.643504	-2.03208
PROLIFERATION	MAPK14	PROLIFERATION	MAPK14-->PROLIFERATION	SIGNOR-255745	0.3	1	1	up-regulates	98939	1.72465	0.643504	-2.2139
PROLIFERATION	PI3K	PROLIFERATION	PI3K-->PROLIFERATION	SIGNOR-255577	0.3	1	1	up-regulates	98939	1.72465	0.643504	-2.2139
PROLIFERATION	AKT	PROLIFERATION	AKT-->PROLIFERATION	SIGNOR-257606	0.3	1	1	up-regulates	98939	1.72465	0.643504	-2.2139
PROLIFERATION	CREB1	PROLIFERATION	CREB1-->PROLIFERATION	SIGNOR-261288	0.3	1	1	up-regulates	98939	1.72465	0.643504	-2.2139
PROLIFERATION	RPS6KB1	PROLIFERATION	RPS6KB1--|MTOR-->PROLIFERATION	SIGNOR-102051;SIGNOR-255944	0.34	2	-1	down-regulates	98939	1.72465	0.643504	-2.15174
