# Supplementary material for: Unveiling the signaling network of FLT3-ITD AML improves drug sensitivity prediction
Source: eLife. 2024 Apr 2;12:RP90532. doi: 10.7554/eLife.90532 (PMC10987088; doi:10.7554/eLife.90532)
Supplement: Supplementary file 2. [file elife-90532-supp2.xlsx]

## Sheet: experimental conditions
		experimental conditions
		1	2	3	4	5	6	7	8	9	10	11	12	13	14	15	16
treatments	Midostaurin (FLT3i)
	IGF1
	TNFa
	SB203580 (p38i)
	SP600125 (JNKi)
	Wortmannin (PI3Ki)
	Rapamycin (mTORi)
	UO126 (MEKi)
	LY2090314 (GSK3i)
recap tretments per each condition		FLT3i	FLT3i+IGF1	FLT3i+TNFa	FLT3i+p38i+ TNFa	FLT3i+JNKi+ TNFa	FLT3i+PI3Ki+IGF1	FLT3i+mTORi+IGF1	FLT3i+MEKi+IGF1	IGF1	TNFa	p38i+ TNFa	JNKi+ TNFa	PI3Ki+IGF1	mTORi+IGF1	MEKi+IGF1	GSK3i+IGF1

## Sheet: treatments
inhibitors	targets	usage	time	stimuli	usage	time
Midostaurin	FLT3	100nM	90 minutes	IGF1	100ng/ml	10 minutes
SB203580	p38	10μM	90 minutes	TNFa	10ng/ml	10 minutes
SP600125	JNK	20μM	90 minutes
Wortmannin	P3K	50nM	90 minutes
Rapamycin	mTOR	100nM	90 minutes
UO126	ERK1/2	15μM	90 minutes
LY2090314	GSK3	20nM	90 minutes

## Sheet: analytes Xmap
analytes	cat.no.	bead region	phosphosite measured	activity annotation
CREB1	42-680MAG	13	Ser133	1
ERK1/2	42-680MAG	42	Thr185/Tyr187	1
JNK	42-680MAG	18	Thr183/Tyr 185	1
p38	42-680MAG	38	Thr180/Tyr182	1
STAT3	42-680MAG	63	Ser727	1
STAT5	42-680MAG	65	Tyr694/699	1
p70S6K	42-611MAG	57	Thr412	1
RPS6	42-611MAG	77	Ser235/236	1
MTOR	42-611MAG	48	Ser2448	1
IGF1R	42-611MAG	43	Tyr1135/Tyr1136	1
PTEN	42-611MAG	72	Ser380	-1
TSC2	42-611MAG	76	Ser939	-1
GSK3A	42-611MAG	75	Ser21	-1
GSK3B	42-611MAG	37	Ser9	-1
B-Tubulin	46-413MAG		total protein	loading control

## Sheet: sentinel-phosphosite annotation
SENTINEL	measured position	gene_name	aminoacid	position in human	position in mus musculus	ACTIVATION
CREB1	Ser133	Creb1	S	119	119	1
ERK1/2	Thr185/Tyr187	Mapk1	T	185	183	1
ERK1/2	Thr185/Tyr187	Mapk3	T	202	203	1
ERK1/2	Thr185/Tyr187	Mapk1	Y	187	185	1
ERK1/2	Thr185/Tyr187	Mapk3	Y	204	205	1
JNK	Thr183/Tyr 185	Mapk8	T	183	183	1
JNK	Thr183/Tyr 185	Mapk8	Y	185	185	1
p38	Thr180/Tyr182	Mapk14	T	180	180	1
p38	Thr180/Tyr182	Mapk14	Y	182	182	1
STAT3	Ser727	Stat3	Y	727	727	1
STAT5	Tyr694/699	Stat5a	Y	694	694	1
STAT5	Tyr694/699	Stat5b	Y	699	699	1
p70S6K	Thr412	Rps6kb1	T	412	412	1
RPS6	Ser235/236	Rps6	S	235	235	1
RPS6	Ser235/236	Rps6	S	236	236	1
MTOR	Ser2448	Mtor	S	2448	2448	1
IGF1R	Tyr1135/Tyr1136	Igf1r	T	1165	1167	1
IGF1R	Tyr1135/Tyr1136	Igf1r	T	1166	1168	1
PTEN	Ser380	Pten	S	380	380	-1
TSC2	Ser939	Tsc2	S	939	939	-1
GSK3A	Ser21	Gsk3a	S	21	21	-1
GSK3B	Ser9	Gsk3b	S	9	9	-1
