# Supplementary material for: Unveiling the signaling network of FLT3-ITD AML improves drug sensitivity prediction
Source: eLife. 2024 Apr 2;12:RP90532. doi: 10.7554/eLife.90532 (PMC10987088; doi:10.7554/eLife.90532)
Supplement: Supplementary file 3. [file elife-90532-supp3.xlsx]

## Sheet: description
Supplementary file 3
This spreadsheet contains the first analysis of the experimental dataset obatined from the luminex instrument used for the models' optimization
9plex_Cat.No.48-680MAG
Raw data
multiparametric raw data of Median Fluorescent Intensity (net MFI)
each sample is reported in triplicates and it is associated with its location in a 96 well plate
filter on n. beads
The Magpix instruments grants accurate measurements only in wells where more than 50 beads per analyte where detected.
We filtered the dataset for the conditions were less than 50 beads were detected.
normalization_betatubulin
we normalized the value of each analyte in each condition on the the corresponding value of the housekeeping protein B-tubulin
median_sd
we obtained the median values between the biological triplicates of the experimetal conditions and the standard deviation.

## Sheet: raw data
9plex_Cat.No.48-680MAG
DataType:	Net MFI
Location	Sample	CREB	JNK	B TUBULIN	NFkB	p38	ERK1\2	Akt	p70S6K	STAT3	STAT5	Total Events
1(1,A1)	JMD CTRL 1	1407	1180	9359	36	12520.5	244	734	104	137.5	82	2531			grey cell	technical instrument error_analyte not detectable in that well
2(1,A2)	JMD CTRL 2	568	801.5	9648	41	11994	173	438.5	103	154.5	101	1747
3(1,A3)	JMD CTRL 3	403	632.5	10875	38	10451.5	131.5	952	102	143	74	1356
4(1,A4)	JMD TNFa 1	1214	1072	9270	36	10203	1443.5	273	164	437	318.5	2454
5(1,A5)	JMD TNFa 2	941	1032.5	9109	36	10710.5	607	239	174	293	272	1800
6(1,A6)	JMD TNFa 3	814.5	990	9793	39.5	9890.5	1048	293	185.5	325	343	1229
7(1,A7)	JMD IGF1 1	700	484	9991.5	32	8305.5	1512.5	253	124	238	291	1909
8(1,A8)	JMD IGF1 2	653.5	509	9247	40	7742.5	682	244	146	262.5	323	1204
9(1,A9)	JMD IGF1 3	584.5	449	9523	38	7568	710	247	148.5	245	316	2988
10(1,A10)	JMD MIDO_TNFa 1	1471	1961	8924.5	42	13272.5	187	230.5	90	236.5	100	2881
11(1,A11)	JMD MIDO_TNFa 2	1496	1840	9158.5	48	13860	214	227	106	251.5	113	1787
12(1,A12)	JMD MIDO_TNFa 3	1777.5	2250	10187	56	14802.5	302	299	136.5	309	138	500
13(1,B1)	JMD MIDO_IGF1 1	383	661.5	8407.5	36	8295	142	217	97	115	98	2209
14(1,B2)	JMD MIDO_IGF1 2	415	723	8356.5	32	9175	181	181.5	78	131	93	2219
15(1,B3)	JMD MIDO_IGF1 3	299	574	8836	31	6114	159	176.5	80	126	78	1534
16(1,B4)	JMD MIDO_SB_TNFa 1	341	3280	8906	35	8977	313	179	81	341	86	2724
17(1,B5)	JMD MIDO_SB_TNFa 2	296	3069	8506	34	9756	292	169	83	300	85	2243
18(1,B6)	JMD MIDO_SB_TNFa 3	345	3638	9003	35	10302	571	192	100	343	94	2512
19(1,B7)	JMD MIDO_SP_TNFa 1	1275.5	1094.5	9130.5	27	13537.5	202	192	78	119.5	76	2767
20(1,B8)	JMD MIDO_SP_TNFa 2	1475	1188	9719	38	13902.5	198	229	89	145	109.5	2476
21(1,B9)	JMD MIDO_SP_TNFa 3	1576	1196.5	8968.5	33	13584	258	190	77	137.5	90	2390
22(1,B10)	JMD MIDO_WORT_IGF1 1	557	978	9852	37.5	11403	184	238.5	95	140	118	1736
23(1,B11)	JMD MIDO_WORT_IGF1 2	392	771.5	9018	27	9330	171	185	82.5	126	88	2237
24(1,B12)	JMD MIDO_WORT_IGF1 3	355	689	8518.5	36.5	8266	163	213	90	130.5	99	2971
25(1,C1)	JMD MIDO_RAPA_IGF1 1	423	852.5	8988	37	7688.5	176	195.5	86	109.5	90.5	2411
26(1,C2)	JMD MIDO_RAPA_IGF1 2	1183	1231.5	8860.5	33	9850	241.5	176	76	132.5	82	2429
27(1,C3)	JMD MIDO_RAPA_IGF1 3	337	691.5	9117	29	6983	138	197	77	126.5	89	2511
28(1,C4)	JMD MIDO_UO126_IGF1 1	295.5	838.5	9045.5	32	6093	75.5	175	75.5	120	83	1895
29(1,C5)	JMD MIDO_UO126_IGF1 2	435	1114	9831.5	30	8182	83	212	86	129	97	1708
30(1,C6)	JMD MIDO_UO126_IGF1 3	297	639	9578	29	6610	79	199	77	121	87	2540
31(1,C7)	JMD SB_TNFa 1	432	2296	9361.5	37	8111.5	1290	211	159	412.5	263	3255
32(1,C8)	JMD SB_TNFa 2	491.5	2421.5	9451	35	7921	1563	220.5	169.5	464	274.5	2703
33(1,C9)	JMD SB_TNFa 3	566.5	2113	9716	44.5	8499.5	1315	232.5	177	421.5	309	2557
34(1,C10)	JMD SP_TNFa 1	1231	879	10048	39	11956	171.5	212.5	95	121	106	2546
35(1,C11)	JMD SP_TNFa 2	1296	885	9553	36	12952	175	218	95.5	129	104	2547
36(1,C12)	JMD SP_TNFa 3	852.5	569	9653	48	9717	139	235.5	101	114.5	104	2004
37(1,D1)	JMD WORT_IGF1 1	1434	727.5	8990	36	8397	1518.5	191	100.5	228	333	2900
38(1,D2)	JMD WORT_IGF1 2	867	677	9003	32	8640.5	1381	197	102	258	326	1793
39(1,D3)	JMD WORT_IGF1 3	559	505	8931	36	6776	715.5	172	94	203	298	2481
40(1,D4)	JMD RAPA_IGF1 1	1030	595	9425	44	7870	1549	207.5	83	318	255.5	1944
41(1,D5)	JMD RAPA_IGF1 2	557	470	9743.5	33	7841	1097	240	82	257	259	2887
42(1,D6)	JMD RAPA_IGF1 3	569.5	421	10179.5	34	6581	603	223	78	212	229	3157
43(1,D7)	JMD UO126_IGF1 1	370.5	1127	10512	32	6669	80	264	94	112	147	3517
44(1,D8)	JMD UO126_IGF1 2	466	962	10137	33	7167	85	242	105	138	272	2671
45(1,D9)	JMD UO126_IGF1 3	402	726.5	9726	28.5	6338	77	207	90.5	121	223	2990
46(1,D10)	JMD LY14_IGF1 1	770	444	9549	35	8940	1264	226	122	310	289	3101
47(1,D11)	JMD LY14_IGF1 2	731.5	411	9742	36	8298.5	788	216	112.5	328.5	280	3037
48(1,D12)	JMD LY14_IGF1 3	675	393	10015	37	8292	785	254	131	279.5	352.5	2474
49(1,E1)	TKD CTRL 1	399	398.5	9816.5	32	10527	95	277	75	97	53	2465
50(1,E2)	TKD CTRL 2	399.5	373	10420	31	10301.5	90	326.5	72	114	54	2610
51(1,E3)	TKD CTRL 3	283	405.5	10874	37	9949	105	393	101	143	60	1132
52(1,E4)	TKD TNFa 1	956.5	730.5	9608	34	9212.5	161	193	145.5	359	355	3130
53(1,E5)	TKD TNFa 2	985	699	10571	32	9349	187	150	121	269	215	2598
54(1,E6)	TKD TNFa 3	896	669	10276	31	8995.5	199.5	253	195	424	494	3288
55(1,E7)	TKD IGF1 1	587.5	279	9934.5	25.5	6371.5	154	207.5	115	256	346	3462
56(1,E8)	TKD IGF1 2	781	354	9778	42	6868.5	172	226	145	351	388	3119
57(1,E9)	TKD IGF1 3	727.5	354.5	10276	43	6984	201	243	141	358	453	2535
58(1,E10)	TKD MIDO_TNFa 1	1039	1217	9830.5	31	13173.5	89.5	219	72	166	61	3205
59(1,E11)	TKD MIDO_TNFa 2	714.5	1005	9687	41	11623	96	218	83.5	168	68	2724
60(1,E12)	TKD MIDO_TNFa 3	815.5	1130	10974	38.5	11969	103	287	97.5	165	63	2136
61(1,F1)	TKD MIDO_IGF1 1	187	295.5	9800	34	4660	85	190	93	100	55	2001
62(1,F2)	TKD MIDO_IGF1 2	290	390.5	9333	32	5004	76	185	65.5	104	53	2665
63(1,F3)	TKD MIDO_IGF1 3	220	357	9637.5	28	4188	73	180	64	110	55	2350
64(1,F4)	TKD MIDO_SB_TNFa 1	188	1901	10016	35	7520	110.5	233	73	182	57	2395
65(1,F5)	TKD MIDO_SB_TNFa 2	260	2449	10194	42	8754	123	227.5	91.5	225	68	2287
66(1,F6)	TKD MIDO_SB_TNFa 3	242	2193	10404	38.5	8528	118	211	95	193	72	1905
67(1,F7)	TKD MIDO_SP_TNFa 1	1209.5	604	10519	29	12192	90	215	64	105	56	2479
68(1,F8)	TKD MIDO_SP_TNFa 2	1320	754	10277	31	11764	94	244.5	76.5	110	59	2874
69(1,F9)	TKD MIDO_SP_TNFa 3	961	760	10260	46	11945	100.5	254	97	123	69	1100
70(1,F10)	TKD MIDO_WORT_IGF1 1	285	404	10201.5	40	7308	96	223	78.5	121	68.5	2768
71(1,F11)	TKD MIDO_WORT_IGF1 2	271.5	418	10139	37	6289	88	195.5	79	116.5	65	2635
72(1,F12)	TKD MIDO_WORT_IGF1 3	293.5	393.5	10496	40	5913	98	302	95	129	74	2040
73(1,G1)	TKD MIDO_RAPA_IGF1 1	262	369	10125	33	4516.5	81.5	212	68	78	55	2512
74(1,G2)	TKD MIDO_RAPA_IGF1 2	255	397.5	9760	29	4109	72	184	65	93	50	2321
75(1,G3)	TKD MIDO_RAPA_IGF1 3	286	406	10489.5	30	4446	75	199	63.5	102	56	2611
76(1,G4)	TKD MIDO_UO126_IGF1 1	188	310.5	10219	29	3974	62	262.5	70	102	52	2756
77(1,G5)	TKD MIDO_UO126_IGF1 2	206.5	353.5	10517.5	25	4954.5	68	259	75.5	96	49	1624
78(1,G6)	TKD MIDO_UO126_IGF1 3	243.5	418	10340.5	40.5	5075	86.5	294	79.5	113	67	2158
79(1,G7)	TKD SB_TNFa 1	478	1865	10722.5	37	7548	501	236	111	390	317.5	3279
80(1,G8)	TKD SB_TNFa 2	422	1912	10952	47	7286	475	298.5	129	413	337.5	3061
81(1,G9)	TKD SB_TNFa 3	569	2486.5	11012.5	41	8937	625	229	103	453.5	334	2594
82(1,G10)	TKD SP_TNFa 1	660	444	10543	34	9732	88	243.5	73	89	74	2971
83(1,G11)	TKD SP_TNFa 2	572	350	10353	35	7970	85	242	74	91	71	3014
84(1,G12)	TKD SP_TNFa 3	1080	433.5	9958.5	39.5	9634	89	246	83	95	70	2814
85(1,H1)	TKD WORT_IGF1 1	739	333	10680	41	5374.5	140.5	250	128.5	175	299	2544
86(1,H2)	TKD WORT_IGF1 2	783.5	374	11087	34	5544	235	539	115	163.5	197	1405
87(1,H3)	TKD WORT_IGF1 3	959	271.5	10831	30	5210	159	239	112	202.5	344.5	2588
88(1,H4)	TKD RAPA_IGF1 1	708.5	322	11135	33	5608	168	296	104.5	224	239.5	1213
89(1,H5)	TKD RAPA_IGF1 2	636.5	295.5	11257	28	6941.5	152	306	67.5	281	300	2169
90(1,H6)	TKD RAPA_IGF1 3	817.5	274	10933.5	28	5599	158	288	63	275	283	2861
91(1,H7)	TKD UO126_IGF1 1	420.5	618.5	11031	37	6300.5	77	327	88	107	185	2926
92(1,H8)	TKD UO126_IGF1 2	394.5	557	11340	35	6671	76	272	105	110.5	319.5	3463
93(1,H9)	TKD UO126_IGF1 3	350	595	11305	39	6066.5	77	242	92	106.5	268	2927
94(1,H10)	TKD LY14_IGF1 1	1004	330	11317	38	7692	160	299.5	118.5	371.5	291.5	2441
95(1,H11)	TKD LY14_IGF1 2	830	304	11453.5	36	6076	154	295	136	413	373	2526
96(1,H12)	TKD LY14_IGF1 3	987	285.5	10801	41	6486.5	178	296.5	125.5	293.5	361	3054
	JMD CTRL 1	JMD CTRL 2	JMD CTRL 3	JMD TNFa 1	JMD TNFa 2	JMD TNFa 3	JMD IGF1 1	JMD IGF1 2	JMD IGF1 3	JMD MIDO_TNFa 1	JMD MIDO_TNFa 2	JMD MIDO_TNFa 3	JMD MIDO_IGF1 1	JMD MIDO_IGF1 2	JMD MIDO_IGF1 3	JMD MIDO_SB_TNFa 1	JMD MIDO_SB_TNFa 2	JMD MIDO_SB_TNFa 3	JMD MIDO_SP_TNFa 1	JMD MIDO_SP_TNFa 2	JMD MIDO_SP_TNFa 3	JMD MIDO_WORT_IGF1 1	JMD MIDO_WORT_IGF1 2	JMD MIDO_WORT_IGF1 3	JMD MIDO_RAPA_IGF1 1	JMD MIDO_RAPA_IGF1 2	JMD MIDO_RAPA_IGF1 3	JMD MIDO_UO126_IGF1 1	JMD MIDO_UO126_IGF1 2	JMD MIDO_UO126_IGF1 3	JMD SB_TNFa 1	JMD SB_TNFa 2	JMD SB_TNFa 3	JMD SP_TNFa 1	JMD SP_TNFa 2	JMD SP_TNFa 3	JMD WORT_IGF1 1	JMD WORT_IGF1 2	JMD WORT_IGF1 3	JMD RAPA_IGF1 1	JMD RAPA_IGF1 2	JMD RAPA_IGF1 3	JMD UO126_IGF1 1	JMD UO126_IGF1 2	JMD UO126_IGF1 3	JMD LY14_IGF1 1	JMD LY14_IGF1 2	JMD LY14_IGF1 3	TKD CTRL 1
CREB	1407	568	403	1214	941	814.5	700	653.5	584.5	1471	1496	1777.5	383	415	299	341	296	345	1275.5	1475	1576	557	392	355	423	1183	337	295.5	435	297	432	491.5	566.5	1231	1296	852.5	1434	867	559	1030	557	569.5	370.5	466	402	770	731.5	675	399
JNK	1180	801.5	632.5	1072	1032.5	990	484	509	449	1961	1840	2250	661.5	723	574	3280	3069	3638	1094.5	1188	1196.5	978	771.5	689	852.5	1231.5	691.5	838.5	1114	639	2296	2421.5	2113	879	885	569	727.5	677	505	595	470	421	1127	962	726.5	444	411	393	398.5
B TUBULIN	9359	9648	10875	9270	9109	9793	9991.5	9247	9523	8924.5	9158.5	10187	8407.5	8356.5	8836	8906	8506	9003	9130.5	9719	8968.5	9852	9018	8518.5	8988	8860.5	9117	9045.5	9831.5	9578	9361.5	9451	9716	10048	9553	9653	8990	9003	8931	9425	9743.5	10179.5	10512	10137	9726	9549	9742	10015	9816.5
NFkB	36	41	38	36	36	39.5	32	40	38	42	48	56	36	32	31	35	34	35	27	38	33	37.5	27	36.5	37	33	29	32	30	29	37	35	44.5	39	36	48	36	32	36	44	33	34	32	33	28.5	35	36	37	32
p38	12520.5	11994	10451.5	10203	10710.5	9890.5	8305.5	7742.5	7568	13272.5	13860	14802.5	8295	9175	6114	8977	9756	10302	13537.5	13902.5	13584	11403	9330	8266	7688.5	9850	6983	6093	8182	6610	8111.5	7921	8499.5	11956	12952	9717	8397	8640.5	6776	7870	7841	6581	6669	7167	6338	8940	8298.5	8292	10527
ERK1\2	244	173	131.5	1443.5	607	1048	1512.5	682	710	187	214	302	142	181	159	313	292	571	202	198	258	184	171	163	176	241.5	138	75.5	83	79	1290	1563	1315	171.5	175	139	1518.5	1381	715.5	1549	1097	603	80	85	77	1264	788	785	95
Akt	734	438.5	952	273	239	293	253	244	247	230.5	227	299	217	181.5	176.5	179	169	192	192	229	190	238.5	185	213	195.5	176	197	175	212	199	211	220.5	232.5	212.5	218	235.5	191	197	172	207.5	240	223	264	242	207	226	216	254	277
p70S6K	104	103	102	164	174	185.5	124	146	148.5	90	106	136.5	97	78	80	81	83	100	78	89	77	95	82.5	90	86	76	77	75.5	86	77	159	169.5	177	95	95.5	101	100.5	102	94	83	82	78	94	105	90.5	122	112.5	131	75
STAT3	137.5	154.5	143	437	293	325	238	262.5	245	236.5	251.5	309	115	131	126	341	300	343	119.5	145	137.5	140	126	130.5	109.5	132.5	126.5	120	129	121	412.5	464	421.5	121	129	114.5	228	258	203	318	257	212	112	138	121	310	328.5	279.5	97
STAT5	82	101	74	318.5	272	343	291	323	316	100	113	138	98	93	78	86	85	94	76	109.5	90	118	88	99	90.5	82	89	83	97	87	263	274.5	309	106	104	104	333	326	298	255.5	259	229	147	272	223	289	280	352.5	53
[truncated: 47 more columns]

## Sheet: filter on n.beads
			red cells	wells where less than 50 beads per analyte were detected
				only red cells values were excluded from the dataset
DataType:	Net MFI														DataType:	Count
Location	Sample	CREB	JNK	B TUBULIN	NFkB	p38	ERK1\2	Akt	p70S6K	STAT3	STAT5	Total Events			Location	Sample	CREB	JNK	B TUBULIN	NFkB	p38	ERK1\2	Akt	p70S6K	STAT3	STAT5	Total Events
1(1,A1)	JMD CTRL 1	1407	1180	9359	36	12520.5	244	734	104	137.5	82	2531			1(1,A1)	JMD CTRL 1	227	251	285	286	312	256	249	87	256	322	2531
2(1,A2)	JMD CTRL 2	568	801.5	9648	41	11994	173	438.5	103	154.5	101	1747			2(1,A2)	JMD CTRL 2	189	140	214	159	194	131	234	79	162	245	1747
3(1,A3)	JMD CTRL 3	403	632.5	10875	38	10451.5	131.5	952	102	143	74	1356			3(1,A3)	JMD CTRL 3	119	102	174	109	152	140	155	44	147	214	1356
4(1,A4)	JMD TNFa 1	1214	1072	9270	36	10203	1443.5	273	164	437	318.5	2454			4(1,A4)	JMD TNFa 1	201	248	275	254	301	232	194	98	263	388	2454
5(1,A5)	JMD TNFa 2	941	1032.5	9109	36	10710.5	607	239	174	293	272	1800			5(1,A5)	JMD TNFa 2	173	166	187	184	202	148	182	104	184	270	1800
6(1,A6)	JMD TNFa 3	814.5	990	9793	39.5	9890.5	1048	293	185.5	325	343	1229			6(1,A6)	JMD TNFa 3	108	91	163	132	114	108	124	86	107	196	1229
7(1,A7)	JMD IGF1 1	700	484	9991.5	32	8305.5	1512.5	253	124	238	291	1909			7(1,A7)	JMD IGF1 1	164	153	206	177	218	206	188	124	197	276	1909
8(1,A8)	JMD IGF1 2	653.5	509	9247	40	7742.5	682	244	146	262.5	323	1204			8(1,A8)	JMD IGF1 2	114	96	169	89	132	111	136	52	96	209	1204
9(1,A9)	JMD IGF1 3	584.5	449	9523	38	7568	710	247	148.5	245	316	2988			9(1,A9)	JMD IGF1 3	268	292	287	342	299	320	294	190	309	387	2988
10(1,A10)	JMD MIDO_TNFa 1	1471	1961	8924.5	42	13272.5	187	230.5	90	236.5	100	2881			10(1,A10)	JMD MIDO_TNFa 1	291	298	326	307	308	278	266	151	276	380	2881
11(1,A11)	JMD MIDO_TNFa 2	1496	1840	9158.5	48	13860	214	227	106	251.5	113	1787			11(1,A11)	JMD MIDO_TNFa 2	170	173	206	207	205	137	181	103	166	239	1787
12(1,A12)	JMD MIDO_TNFa 3	1777.5	2250	10187	56	14802.5	302	299	136.5	309	138	500			12(1,A12)	JMD MIDO_TNFa 3	58	37	69	49	52	47	52	24	43	69	500
13(1,B1)	JMD MIDO_IGF1 1	383	661.5	8407.5	36	8295	142	217	97	115	98	2209			13(1,B1)	JMD MIDO_IGF1 1	204	208	224	208	248	207	225	147	236	302	2209
14(1,B2)	JMD MIDO_IGF1 2	415	723	8356.5	32	9175	181	181.5	78	131	93	2219			14(1,B2)	JMD MIDO_IGF1 2	173	238	238	282	259	207	190	110	259	263	2219
15(1,B3)	JMD MIDO_IGF1 3	299	574	8836	31	6114	159	176.5	80	126	78	1534			15(1,B3)	JMD MIDO_IGF1 3	120	123	192	185	178	150	112	61	179	234	1534
16(1,B4)	JMD MIDO_SB_TNFa 1	341	3280	8906	35	8977	313	179	81	341	86	2724			16(1,B4)	JMD MIDO_SB_TNFa 1	206	304	293	304	347	279	203	134	321	333	2724
17(1,B5)	JMD MIDO_SB_TNFa 2	296	3069	8506	34	9756	292	169	83	300	85	2243			17(1,B5)	JMD MIDO_SB_TNFa 2	214	249	255	268	250	213	171	123	248	252	2243
18(1,B6)	JMD MIDO_SB_TNFa 3	345	3638	9003	35	10302	571	192	100	343	94	2512			18(1,B6)	JMD MIDO_SB_TNFa 3	198	257	277	283	273	269	204	112	304	335	2512
19(1,B7)	JMD MIDO_SP_TNFa 1	1275.5	1094.5	9130.5	27	13537.5	202	192	78	119.5	76	2767			19(1,B7)	JMD MIDO_SP_TNFa 1	246	348	334	291	310	238	195	135	310	360	2767
20(1,B8)	JMD MIDO_SP_TNFa 2	1475	1188	9719	38	13902.5	198	229	89	145	109.5	2476			20(1,B8)	JMD MIDO_SP_TNFa 2	237	218	277	265	288	227	259	154	237	314	2476
21(1,B9)	JMD MIDO_SP_TNFa 3	1576	1196.5	8968.5	33	13584	258	190	77	137.5	90	2390			21(1,B9)	JMD MIDO_SP_TNFa 3	224	240	258	266	284	219	205	114	252	328	2390
22(1,B10)	JMD MIDO_WORT_IGF1 1	557	978	9852	37.5	11403	184	238.5	95	140	118	1736			22(1,B10)	JMD MIDO_WORT_IGF1 1	170	137	213	168	179	161	172	107	163	266	1736
23(1,B11)	JMD MIDO_WORT_IGF1 2	392	771.5	9018	27	9330	171	185	82.5	126	88	2237			23(1,B11)	JMD MIDO_WORT_IGF1 2	173	234	245	279	236	195	209	140	216	310	2237
24(1,B12)	JMD MIDO_WORT_IGF1 3	355	689	8518.5	36.5	8266	163	213	90	130.5	99	2971			24(1,B12)	JMD MIDO_WORT_IGF1 3	259	306	288	334	339	253	287	199	316	390	2971
25(1,C1)	JMD MIDO_RAPA_IGF1 1	423	852.5	8988	37	7688.5	176	195.5	86	109.5	90.5	2411			25(1,C1)	JMD MIDO_RAPA_IGF1 1	219	228	247	248	312	247	242	160	250	258	2411
26(1,C2)	JMD MIDO_RAPA_IGF1 2	1183	1231.5	8860.5	33	9850	241.5	176	76	132.5	82	2429			26(1,C2)	JMD MIDO_RAPA_IGF1 2	223	260	262	303	260	240	206	124	244	307	2429
27(1,C3)	JMD MIDO_RAPA_IGF1 3	337	691.5	9117	29	6983	138	197	77	126.5	89	2511			27(1,C3)	JMD MIDO_RAPA_IGF1 3	210	284	277	292	277	231	210	149	276	305	2511
28(1,C4)	JMD MIDO_UO126_IGF1 1	295.5	838.5	9045.5	32	6093	75.5	175	75.5	120	83	1895			28(1,C4)	JMD MIDO_UO126_IGF1 1	150	172	242	216	200	188	153	100	223	251	1895
29(1,C5)	JMD MIDO_UO126_IGF1 2	435	1114	9831.5	30	8182	83	212	86	129	97	1708			29(1,C5)	JMD MIDO_UO126_IGF1 2	154	155	194	175	199	189	148	77	193	224	1708
30(1,C6)	JMD MIDO_UO126_IGF1 3	297	639	9578	29	6610	79	199	77	121	87	2540			30(1,C6)	JMD MIDO_UO126_IGF1 3	205	290	281	322	287	242	188	133	273	319	2540
31(1,C7)	JMD SB_TNFa 1	432	2296	9361.5	37	8111.5	1290	211	159	412.5	263	3255			31(1,C7)	JMD SB_TNFa 1	285	345	360	346	394	309	293	202	342	379	3255
32(1,C8)	JMD SB_TNFa 2	491.5	2421.5	9451	35	7921	1563	220.5	169.5	464	274.5	2703			32(1,C8)	JMD SB_TNFa 2	232	268	313	259	281	267	272	158	313	340	2703
33(1,C9)	JMD SB_TNFa 3	566.5	2113	9716	44.5	8499.5	1315	232.5	177	421.5	309	2557			33(1,C9)	JMD SB_TNFa 3	212	259	275	314	252	257	216	153	272	347	2557
34(1,C10)	JMD SP_TNFa 1	1231	879	10048	39	11956	171.5	212.5	95	121	106	2546			34(1,C10)	JMD SP_TNFa 1	257	245	283	269	283	212	220	173	276	328	2546
35(1,C11)	JMD SP_TNFa 2	1296	885	9553	36	12952	175	218	95.5	129	104	2547			35(1,C11)	JMD SP_TNFa 2	201	249	280	321	266	259	190	128	261	392	2547
36(1,C12)	JMD SP_TNFa 3	852.5	569	9653	48	9717	139	235.5	101	114.5	104	2004			36(1,C12)	JMD SP_TNFa 3	166	199	236	211	237	199	184	91	206	275	2004
37(1,D1)	JMD WORT_IGF1 1	1434	727.5	8990	36	8397	1518.5	191	100.5	228	333	2900			37(1,D1)	JMD WORT_IGF1 1	306	292	301	306	321	266	288	180	269	371	2900
38(1,D2)	JMD WORT_IGF1 2	867	677	9003	32	8640.5	1381	197	102	258	326	1793			38(1,D2)	JMD WORT_IGF1 2	135	175	185	225	202	190	139	85	213	244	1793
39(1,D3)	JMD WORT_IGF1 3	559	505	8931	36	6776	715.5	172	94	203	298	2481			39(1,D3)	JMD WORT_IGF1 3	205	260	260	307	299	222	193	135	302	298	2481
40(1,D4)	JMD RAPA_IGF1 1	1030	595	9425	44	7870	1549	207.5	83	318	255.5	1944			40(1,D4)	JMD RAPA_IGF1 1	146	196	222	210	219	189	164	92	236	270	1944
41(1,D5)	JMD RAPA_IGF1 2	557	470	9743.5	33	7841	1097	240	82	257	259	2887			41(1,D5)	JMD RAPA_IGF1 2	228	300	286	353	341	285	254	149	329	362	2887
42(1,D6)	JMD RAPA_IGF1 3	569.5	421	10179.5	34	6581	603	223	78	212	229	3157			42(1,D6)	JMD RAPA_IGF1 3	220	342	360	389	391	271	263	174	355	392	3157
43(1,D7)	JMD UO126_IGF1 1	370.5	1127	10512	32	6669	80	264	94	112	147	3517			43(1,D7)	JMD UO126_IGF1 1	266	367	471	413	440	268	306	193	394	399	3517
44(1,D8)	JMD UO126_IGF1 2	466	962	10137	33	7167	85	242	105	138	272	2671			44(1,D8)	JMD UO126_IGF1 2	259	265	297	279	312	230	247	152	278	352	2671
45(1,D9)	JMD UO126_IGF1 3	402	726.5	9726	28.5	6338	77	207	90.5	121	223	2990			45(1,D9)	JMD UO126_IGF1 3	236	316	310	330	359	257	318	162	310	392	2990
46(1,D10)	JMD LY14_IGF1 1	770	444	9549	35	8940	1264	226	122	310	289	3101			46(1,D10)	JMD LY14_IGF1 1	259	294	372	350	341	312	264	211	309	389	3101
47(1,D11)	JMD LY14_IGF1 2	731.5	411	9742	36	8298.5	788	216	112.5	328.5	280	3037			47(1,D11)	JMD LY14_IGF1 2	242	287	351	348	338	290	278	190	344	369	3037
48(1,D12)	JMD LY14_IGF1 3	675	393	10015	37	8292	785	254	131	279.5	352.5	2474			48(1,D12)	JMD LY14_IGF1 3	183	254	257	264	251	239	233	147	264	382	2474
49(1,E1)	TKD CTRL 1	399	398.5	9816.5	32	10527	95	277	75	97	53	2465			49(1,E1)	TKD CTRL 1	219	238	242	295	289	237	262	123	257	303	2465
50(1,E2)	TKD CTRL 2	399.5	373	10420	31	10301.5	90	326.5	72	114	54	2610			50(1,E2)	TKD CTRL 2	222	260	303	305	292	256	264	100	290	318	2610
51(1,E3)	TKD CTRL 3	283	405.5	10874	37	9949	105	393	101	143	60	1132			51(1,E3)	TKD CTRL 3	132	78	141	124	117	108	126	41	118	147	1132
52(1,E4)	TKD TNFa 1	956.5	730.5	9608	34	9212.5	161	193	145.5	359	355	3130			52(1,E4)	TKD TNFa 1	232	358	357	338	360	267	267	210	371	370	3130
53(1,E5)	TKD TNFa 2	985	699	10571	32	9349	187	150	121	269	215	2598			53(1,E5)	TKD TNFa 2	175	290	315	261	277	234	257	142	293	354	2598
54(1,E6)	TKD TNFa 3	896	669	10276	31	8995.5	199.5	253	195	424	494	3288			54(1,E6)	TKD TNFa 3	276	355	342	295	394	294	318	200	387	427	3288
55(1,E7)	TKD IGF1 1	587.5	279	9934.5	25.5	6371.5	154	207.5	115	256	346	3462			55(1,E7)	TKD IGF1 1	288	325	420	334	420	303	342	204	366	460	3462
56(1,E8)	TKD IGF1 2	781	354	9778	42	6868.5	172	226	145	351	388	3119			56(1,E8)	TKD IGF1 2	257	313	347	375	322	255	327	195	337	391	3119
57(1,E9)	TKD IGF1 3	727.5	354.5	10276	43	6984	201	243	141	358	453	2535			57(1,E9)	TKD IGF1 3	210	218	275	310	279	243	195	123	281	401	2535
58(1,E10)	TKD MIDO_TNFa 1	1039	1217	9830.5	31	13173.5	89.5	219	72	166	61	3205			58(1,E10)	TKD MIDO_TNFa 1	315	343	364	340	370	292	286	168	337	390	3205
59(1,E11)	TKD MIDO_TNFa 2	714.5	1005	9687	41	11623	96	218	83.5	168	68	2724			59(1,E11)	TKD MIDO_TNFa 2	208	301	273	321	315	243	248	160	291	364	2724
60(1,E12)	TKD MIDO_TNFa 3	815.5	1130	10974	38.5	11969	103	287	97.5	165	63	2136			60(1,E12)	TKD MIDO_TNFa 3	206	177	239	230	253	193	221	114	230	273	2136
61(1,F1)	TKD MIDO_IGF1 1	187	295.5	9800	34	4660	85	190	93	100	55	2001			61(1,F1)	TKD MIDO_IGF1 1	160	174	259	205	201	204	181	116	232	269	2001
62(1,F2)	TKD MIDO_IGF1 2	290	390.5	9333	32	5004	76	185	65.5	104	53	2665			62(1,F2)	TKD MIDO_IGF1 2	230	278	293	331	318	236	216	146	286	331	2665
63(1,F3)	TKD MIDO_IGF1 3	220	357	9637.5	28	4188	73	180	64	110	55	2350			63(1,F3)	TKD MIDO_IGF1 3	207	215	288	257	281	211	203	157	258	273	2350
64(1,F4)	TKD MIDO_SB_TNFa 1	188	1901	10016	35	7520	110.5	233	73	182	57	2395			64(1,F4)	TKD MIDO_SB_TNFa 1	207	257	283	276	281	222	196	114	291	268	2395
65(1,F5)	TKD MIDO_SB_TNFa 2	260	2449	10194	42	8754	123	227.5	91.5	225	68	2287			65(1,F5)	TKD MIDO_SB_TNFa 2	162	241	291	272	261	193	194	124	233	316	2287
66(1,F6)	TKD MIDO_SB_TNFa 3	242	2193	10404	38.5	8528	118	211	95	193	72	1905			66(1,F6)	TKD MIDO_SB_TNFa 3	160	170	199	178	242	181	191	103	218	263	1905
67(1,F7)	TKD MIDO_SP_TNFa 1	1209.5	604	10519	29	12192	90	215	64	105	56	2479			67(1,F7)	TKD MIDO_SP_TNFa 1	216	235	260	237	301	221	277	141	267	324	2479
68(1,F8)	TKD MIDO_SP_TNFa 2	1320	754	10277	31	11764	94	244.5	76.5	110	59	2874			68(1,F8)	TKD MIDO_SP_TNFa 2	280	280	342	337	321	251	266	164	289	344	2874
69(1,F9)	TKD MIDO_SP_TNFa 3	961	760	10260	46	11945	100.5	254	97	123	69	1100			69(1,F9)	TKD MIDO_SP_TNFa 3	98	65	145	93	124	102	145	67	89	172	1100
70(1,F10)	TKD MIDO_WORT_IGF1 1	285	404	10201.5	40	7308	96	223	78.5	121	68.5	2768			70(1,F10)	TKD MIDO_WORT_IGF1 1	224	243	320	315	316	241	245	172	300	392	2768
71(1,F11)	TKD MIDO_WORT_IGF1 2	271.5	418	10139	37	6289	88	195.5	79	116.5	65	2635			71(1,F11)	TKD MIDO_WORT_IGF1 2	212	273	293	306	316	266	212	133	280	344	2635
72(1,F12)	TKD MIDO_WORT_IGF1 3	293.5	393.5	10496	40	5913	98	302	95	129	74	2040			72(1,F12)	TKD MIDO_WORT_IGF1 3	186	198	204	206	223	199	197	134	215	278	2040
73(1,G1)	TKD MIDO_RAPA_IGF1 1	262	369	10125	33	4516.5	81.5	212	68	78	55	2512			73(1,G1)	TKD MIDO_RAPA_IGF1 1	217	259	275	264	274	238	253	178	255	299	2512
74(1,G2)	TKD MIDO_RAPA_IGF1 2	255	397.5	9760	29	4109	72	184	65	93	50	2321			74(1,G2)	TKD MIDO_RAPA_IGF1 2	193	238	250	265	270	220	204	127	250	304	2321
75(1,G3)	TKD MIDO_RAPA_IGF1 3	286	406	10489.5	30	4446	75	199	63.5	102	56	2611			75(1,G3)	TKD MIDO_RAPA_IGF1 3	215	260	276	294	286	270	256	178	247	329	2611
76(1,G4)	TKD MIDO_UO126_IGF1 1	188	310.5	10219	29	3974	62	262.5	70	102	52	2756			76(1,G4)	TKD MIDO_UO126_IGF1 1	219	282	319	317	325	285	240	121	298	350	2756
77(1,G5)	TKD MIDO_UO126_IGF1 2	206.5	353.5	10517.5	25	4954.5	68	259	75.5	96	49	1624			77(1,G5)	TKD MIDO_UO126_IGF1 2	110	164	194	195	196	163	132	74	163	233	1624
78(1,G6)	TKD MIDO_UO126_IGF1 3	243.5	418	10340.5	40.5	5075	86.5	294	79.5	113	67	2158			78(1,G6)	TKD MIDO_UO126_IGF1 3	180	212	260	224	227	204	190	138	248	275	2158
79(1,G7)	TKD SB_TNFa 1	478	1865	10722.5	37	7548	501	236	111	390	317.5	3279			79(1,G7)	TKD SB_TNFa 1	265	356	368	326	403	307	305	213	318	418	3279
80(1,G8)	TKD SB_TNFa 2	422	1912	10952	47	7286	475	298.5	129	413	337.5	3061			80(1,G8)	TKD SB_TNFa 2	284	309	359	333	340	290	262	195	333	356	3061
81(1,G9)	TKD SB_TNFa 3	569	2486.5	11012.5	41	8937	625	229	103	453.5	334	2594			81(1,G9)	TKD SB_TNFa 3	204	236	312	292	291	246	235	151	280	347	2594
82(1,G10)	TKD SP_TNFa 1	660	444	10543	34	9732	88	243.5	73	89	74	2971			82(1,G10)	TKD SP_TNFa 1	260	313	320	350	339	265	262	176	308	378	2971
83(1,G11)	TKD SP_TNFa 2	572	350	10353	35	7970	85	242	74	91	71	3014			83(1,G11)	TKD SP_TNFa 2	255	330	377	339	348	257	263	177	302	366	3014
84(1,G12)	TKD SP_TNFa 3	1080	433.5	9958.5	39.5	9634	89	246	83	95	70	2814			84(1,G12)	TKD SP_TNFa 3	259	314	318	330	289	227	286	173	259	359	2814
85(1,H1)	TKD WORT_IGF1 1	739	333	10680	41	5374.5	140.5	250	128.5	175	299	2544			85(1,H1)	TKD WORT_IGF1 1	231	222	281	263	274	238	248	178	298	311	2544
86(1,H2)	TKD WORT_IGF1 2	783.5	374	11087	34	5544	235	539	115	163.5	197	1405			86(1,H2)	TKD WORT_IGF1 2	118	77	191	127	139	165	163	65	160	200	1405
87(1,H3)	TKD WORT_IGF1 3	959	271.5	10831	30	5210	159	239	112	202.5	344.5	2588			87(1,H3)	TKD WORT_IGF1 3	233	250	283	283	281	256	234	156	254	358	2588
88(1,H4)	TKD RAPA_IGF1 1	708.5	322	11135	33	5608	168	296	104.5	224	239.5	1213			88(1,H4)	TKD RAPA_IGF1 1	94	97	142	103	125	119	153	80	118	182	1213
89(1,H5)	TKD RAPA_IGF1 2	636.5	295.5	11257	28	6941.5	152	306	67.5	281	300	2169			89(1,H5)	TKD RAPA_IGF1 2	142	236	237	266	236	189	205	114	247	297	2169
90(1,H6)	TKD RAPA_IGF1 3	817.5	274	10933.5	28	5599	158	288	63	275	283	2861			90(1,H6)	TKD RAPA_IGF1 3	236	291	316	321	310	243	275	162	301	406	2861
91(1,H7)	TKD UO126_IGF1 1	420.5	618.5	11031	37	6300.5	77	327	88	107	185	2926			91(1,H7)	TKD UO126_IGF1 1	214	334	363	334	330	234	273	123	300	421	2926
92(1,H8)	TKD UO126_IGF1 2	394.5	557	11340	35	6671	76	272	105	110.5	319.5	3463			92(1,H8)	TKD UO126_IGF1 2	308	359	350	369	354	305	361	249	378	430	3463
93(1,H9)	TKD UO126_IGF1 3	350	595	11305	39	6066.5	77	242	92	106.5	268	2927			93(1,H9)	TKD UO126_IGF1 3	254	319	305	335	322	257	267	191	312	365	2927
94(1,H10)	TKD LY14_IGF1 1	1004	330	11317	38	7692	160	299.5	118.5	371.5	291.5	2441			94(1,H10)	TKD LY14_IGF1 1	199	251	271	307	221	208	216	160	274	334	2441
95(1,H11)	TKD LY14_IGF1 2	830	304	11453.5	36	6076	154	295	136	413	373	2526			95(1,H11)	TKD LY14_IGF1 2	235	237	268	281	273	213	269	171	246	333	2526
96(1,H12)	TKD LY14_IGF1 3	987	285.5	10801	41	6486.5	178	296.5	125.5	293.5	361	3054			96(1,H12)	TKD LY14_IGF1 3	307	276	341	284	354	277	322	204	318	371	3054

## Sheet: normalization_betatubulin
RAW DATA
		JMD CTRL 1	JMD CTRL 2	JMD CTRL 3	JMD TNFa 1	JMD TNFa 2	JMD TNFa 3	JMD IGF1 1	JMD IGF1 2	JMD IGF1 3	JMD MIDO_TNFa 1	JMD MIDO_TNFa 2	JMD MIDO_TNFa 3	JMD MIDO_IGF1 1	JMD MIDO_IGF1 2	JMD MIDO_IGF1 3	JMD MIDO_SB_TNFa 1	JMD MIDO_SB_TNFa 2	JMD MIDO_SB_TNFa 3	JMD MIDO_SP_TNFa 1	JMD MIDO_SP_TNFa 2	JMD MIDO_SP_TNFa 3	JMD MIDO_WORT_IGF1 1	JMD MIDO_WORT_IGF1 2	JMD MIDO_WORT_IGF1 3	JMD MIDO_RAPA_IGF1 1	JMD MIDO_RAPA_IGF1 2	JMD MIDO_RAPA_IGF1 3	JMD MIDO_UO126_IGF1 1	JMD MIDO_UO126_IGF1 2	JMD MIDO_UO126_IGF1 3	JMD SB_TNFa 1	JMD SB_TNFa 2	JMD SB_TNFa 3	JMD SP_TNFa 1	JMD SP_TNFa 2	JMD SP_TNFa 3	JMD WORT_IGF1 1	JMD WORT_IGF1 2	JMD WORT_IGF1 3	JMD RAPA_IGF1 1	JMD RAPA_IGF1 2	JMD RAPA_IGF1 3	JMD UO126_IGF1 1	JMD UO126_IGF1 2	JMD UO126_IGF1 3	JMD LY14_IGF1 1	JMD LY14_IGF1 2	JMD LY14_IGF1 3
	CREB	1407	568	403	1214	941	814.5	700	653.5	584.5	1471	1496	1777.5	383	415	299	341	296	345	1275.5	1475	1576	557	392	355	423	1183	337	295.5	435	297	432	491.5	566.5	1231	1296	852.5	1434	867	559	1030	557	569.5	370.5	466	402	770	731.5	675
	JNK	1180	801.5	632.5	1072	1032.5	990	484	509	449	1961	1840	2250	661.5	723	574	3280	3069	3638	1094.5	1188	1196.5	978	771.5	689	852.5	1231.5	691.5	838.5	1114	639	2296	2421.5	2113	879	885	569	727.5	677	505	595	470	421	1127	962	726.5	444	411	393
	B TUBULIN	9359	9648	10875	9270	9109	9793	9991.5	9247	9523	8924.5	9158.5	10187	8407.5	8356.5	8836	8906	8506	9003	9130.5	9719	8968.5	9852	9018	8518.5	8988	8860.5	9117	9045.5	9831.5	9578	9361.5	9451	9716	10048	9553	9653	8990	9003	8931	9425	9743.5	10179.5	10512	10137	9726	9549	9742	10015
	NFkB	36	41	38	36	36	39.5	32	40	38	42	48	56	36	32	31	35	34	35	27	38	33	37.5	27	36.5	37	33	29	32	30	29	37	35	44.5	39	36	48	36	32	36	44	33	34	32	33	28.5	35	36	37
	p38	12520.5	11994	10451.5	10203	10710.5	9890.5	8305.5	7742.5	7568	13272.5	13860	14802.5	8295	9175	6114	8977	9756	10302	13537.5	13902.5	13584	11403	9330	8266	7688.5	9850	6983	6093	8182	6610	8111.5	7921	8499.5	11956	12952	9717	8397	8640.5	6776	7870	7841	6581	6669	7167	6338	8940	8298.5	8292
	ERK1\2	244	173	131.5	1443.5	607	1048	1512.5	682	710	187	214	302	142	181	159	313	292	571	202	198	258	184	171	163	176	241.5	138	75.5	83	79	1290	1563	1315	171.5	175	139	1518.5	1381	715.5	1549	1097	603	80	85	77	1264	788	785
	Akt	734	438.5	952	273	239	293	253	244	247	230.5	227	299	217	181.5	176.5	179	169	192	192	229	190	238.5	185	213	195.5	176	197	175	212	199	211	220.5	232.5	212.5	218	235.5	191	197	172	207.5	240	223	264	242	207	226	216	254
	p70S6K	104	103	102	164	174	185.5	124	146	148.5	90	106	136.5	97	78	80	81	83	100	78	89	77	95	82.5	90	86	76	77	75.5	86	77	159	169.5	177	95	95.5	101	100.5	102	94	83	82	78	94	105	90.5	122	112.5	131
	STAT3	137.5	154.5	143	437	293	325	238	262.5	245	236.5	251.5	309	115	131	126	341	300	343	119.5	145	137.5	140	126	130.5	109.5	132.5	126.5	120	129	121	412.5	464	421.5	121	129	114.5	228	258	203	318	257	212	112	138	121	310	328.5	279.5
	STAT5	82	101	74	318.5	272	343	291	323	316	100	113	138	98	93	78	86	85	94	76	109.5	90	118	88	99	90.5	82	89	83	97	87	263	274.5	309	106	104	104	333	326	298	255.5	259	229	147	272	223	289	280	352.5
NORMALIZED ON B TUBULIN
		JMD CTRL 1	JMD CTRL 2	JMD CTRL 3	JMD TNFa 1	JMD TNFa 2	JMD TNFa 3	JMD IGF1 1	JMD IGF1 2	JMD IGF1 3	JMD MIDO_TNFa 1	JMD MIDO_TNFa 2	JMD MIDO_TNFa 3	JMD MIDO_IGF1 1	JMD MIDO_IGF1 2	JMD MIDO_IGF1 3	JMD MIDO_SB_TNFa 1	JMD MIDO_SB_TNFa 2	JMD MIDO_SB_TNFa 3	JMD MIDO_SP_TNFa 1	JMD MIDO_SP_TNFa 2	JMD MIDO_SP_TNFa 3	JMD MIDO_WORT_IGF1 1	JMD MIDO_WORT_IGF1 2	JMD MIDO_WORT_IGF1 3	JMD MIDO_RAPA_IGF1 1	JMD MIDO_RAPA_IGF1 2	JMD MIDO_RAPA_IGF1 3	JMD MIDO_UO126_IGF1 1	JMD MIDO_UO126_IGF1 2	JMD MIDO_UO126_IGF1 3	JMD SB_TNFa 1	JMD SB_TNFa 2	JMD SB_TNFa 3	JMD SP_TNFa 1	JMD SP_TNFa 2	JMD SP_TNFa 3	JMD WORT_IGF1 1	JMD WORT_IGF1 2	JMD WORT_IGF1 3	JMD RAPA_IGF1 1	JMD RAPA_IGF1 2	JMD RAPA_IGF1 3	JMD UO126_IGF1 1	JMD UO126_IGF1 2	JMD UO126_IGF1 3	JMD LY14_IGF1 1	JMD LY14_IGF1 2	JMD LY14_IGF1 3
	CREB	0.150337	0.0588723	0.0370575	0.13096	0.103304	0.0831717	0.0700596	0.0706716	0.0613777	0.164827	0.163346	0.174487	0.0455546	0.0496619	0.0338388	0.0382888	0.034799	0.0383206	0.139697	0.151765	0.175726	0.0565367	0.0434686	0.041674	0.0470628	0.133514	0.0369639	0.0326682	0.0442455	0.0310086	0.0461465	0.0520051	0.0583059	0.122512	0.135664	0.0883145	0.159511	0.0963012	0.062591	0.109284	0.0571663	0.0559458	0.0352454	0.0459702	0.0413325	0.0806367	0.0750873	0.0673989
	JNK	0.126082	0.0830742	0.0581609	0.115642	0.113349	0.101093	0.0484412	0.0550449	0.047149	0.219732	0.200906	0.22087	0.0786798	0.0865195	0.0649615	0.368291	0.360804	0.404088	0.119873	0.122235	0.133411	0.0992692	0.0855511	0.0808828	0.0948487	0.138988	0.0758473	0.092698	0.113309	0.0667154	0.24526	0.256216	0.217476	0.0874801	0.0926411	0.0589454	0.0809232	0.0751972	0.0565446	0.06313	0.0482373	0.0413576	0.107211	0.0948999	0.0746967	0.046497	0.0421885	0.0392411
	B TUBULIN	1	1	1	1	1	1	1	1	1	1	1	1	1	1	1	1	1	1	1	1	1	1	1	1	1	1	1	1	1	1	1	1	1	1	1	1	1	1	1	1	1	1	1	1	1	1	1	1
	NFkB	0.00384656	0.00424959	0.00349425	0.0038835	0.00395214	0.00403349	0.00320272	0.00432573	0.00399034	0.00470615	0.00524103	0.0054972	0.00428189	0.00382935	0.00350837	0.00392993	0.00399718	0.00388759	0.00295712	0.00390987	0.00367955	0.00380633	0.00299401	0.00428479	0.0041166	0.00372439	0.00318087	0.00353767	0.00305142	0.00302777	0.00395236	0.00370331	0.00458007	0.00388137	0.00376845	0.00497255	0.00400445	0.00355437	0.0040309	0.00466844	0.00338687	0.00334005	0.00304414	0.0032554	0.00293029	0.00366531	0.00369534	0.00369446
	p38	1.3378	1.24316	0.961057	1.10065	1.17582	1.00996	0.831257	0.837299	0.794708	1.4872	1.51335	1.45308	0.986619	1.09795	0.691942	1.00797	1.14696	1.14429	1.48267	1.43045	1.51463	1.15743	1.0346	0.970359	0.855418	1.11168	0.765932	0.673595	0.832223	0.690123	0.866474	0.838112	0.874794	1.18989	1.3558	1.00663	0.934038	0.959736	0.758706	0.835013	0.804742	0.646495	0.634418	0.707014	0.651655	0.936224	0.851827	0.827958
	ERK1\2	0.0260712	0.0179312	0.012092	0.155717	0.0666374	0.107015	0.151379	0.0737536	0.0745563	0.0209536	0.0233663	0.0296456	0.0168897	0.0216598	0.0179946	0.0351448	0.0343287	0.0634233	0.0221237	0.0203725	0.0287674	0.0186764	0.0189621	0.0191348	0.0195817	0.0272558	0.0151366	0.00834669	0.00844225	0.00824807	0.137798	0.165379	0.135344	0.0170681	0.0183189	0.0143997	0.16891	0.153393	0.0801142	0.16435	0.112588	0.0592367	0.00761035	0.00838512	0.00791692	0.13237	0.0808869	0.0783824
	Akt	0.0784272	0.0454498	0.0875402	0.0294498	0.0262378	0.0299193	0.0253215	0.0263869	0.0259372	0.0258278	0.0247857	0.0293511	0.0258103	0.0217196	0.0199751	0.0200988	0.0198683	0.0213262	0.0210284	0.0235621	0.0211853	0.0242083	0.0205145	0.0250044	0.0217512	0.0198634	0.021608	0.0193466	0.0215633	0.0207768	0.0225391	0.0233309	0.0239296	0.0211485	0.0228201	0.0243966	0.0212458	0.0218816	0.0192588	0.0220159	0.0246318	0.0219068	0.0251142	0.0238729	0.0212832	0.0236674	0.022172	0.025362
	p70S6K	0.0111123	0.0106758	0.00937931	0.0176915	0.019102	0.0189421	0.0124105	0.0157889	0.0155938	0.0100846	0.0115739	0.0133994	0.0115373	0.00933405	0.00905387	0.00909499	0.00975782	0.0111074	0.0085428	0.00915732	0.00858561	0.00964271	0.00914837	0.0105652	0.00956831	0.00857739	0.00844576	0.00834669	0.00874739	0.00803926	0.0169845	0.0179346	0.0182174	0.00945462	0.00999686	0.0104631	0.0111791	0.0113296	0.0105251	0.00880637	0.00841587	0.00766246	0.00894216	0.0103581	0.00930496	0.0127762	0.0115479	0.0130804
	STAT3	0.0146917	0.0160137	0.0131494	0.0471413	0.032166	0.033187	0.0238202	0.0283876	0.0257272	0.0265001	0.0274608	0.0303328	0.0136783	0.0156764	0.0142598	0.0382888	0.0352692	0.0380984	0.013088	0.0149192	0.0153314	0.0142103	0.0139721	0.0153196	0.0121829	0.014954	0.0138752	0.0132663	0.0131211	0.0126331	0.0440635	0.0490953	0.0433821	0.0120422	0.0135036	0.0118616	0.0253615	0.0286571	0.0227298	0.0337401	0.0263766	0.0208262	0.0106545	0.0136135	0.0124409	0.0324641	0.03372	0.0279081
	STAT5	0.00876162	0.0104685	0.0068046	0.0343581	0.0298606	0.035025	0.0291248	0.0349302	0.0331828	0.0112051	0.0123383	0.0135467	0.0116563	0.0111291	0.00882752	0.00965641	0.00999295	0.010441	0.00832375	0.0112666	0.0100351	0.0119773	0.00975826	0.0116218	0.010069	0.00925456	0.00976198	0.00917583	0.00986625	0.00908332	0.0280938	0.0290445	0.0318032	0.0105494	0.0108866	0.0107739	0.0370412	0.0362102	0.0333669	0.0271088	0.0265818	0.0224962	0.013984	0.0268324	0.0229282	0.0302649	0.0287415	0.0351972
		JMD CTRL 1	JMD CTRL 2	JMD CTRL 3	JMD TNFa 1	JMD TNFa 2	JMD TNFa 3	JMD IGF1 1	JMD IGF1 2	JMD IGF1 3	JMD MIDO_TNFa 1	JMD MIDO_TNFa 2	JMD MIDO_TNFa 3	JMD MIDO_IGF1 1	JMD MIDO_IGF1 2	JMD MIDO_IGF1 3	JMD MIDO_SB_TNFa 1	JMD MIDO_SB_TNFa 2	JMD MIDO_SB_TNFa 3	JMD MIDO_SP_TNFa 1	JMD MIDO_SP_TNFa 2	JMD MIDO_SP_TNFa 3	JMD MIDO_WORT_IGF1 1	JMD MIDO_WORT_IGF1 2	JMD MIDO_WORT_IGF1 3	JMD MIDO_RAPA_IGF1 1	JMD MIDO_RAPA_IGF1 2	JMD MIDO_RAPA_IGF1 3	JMD MIDO_UO126_IGF1 1	JMD MIDO_UO126_IGF1 2	JMD MIDO_UO126_IGF1 3	JMD SB_TNFa 1	JMD SB_TNFa 2	JMD SB_TNFa 3	JMD SP_TNFa 1	JMD SP_TNFa 2	JMD SP_TNFa 3	JMD WORT_IGF1 1	JMD WORT_IGF1 2	JMD WORT_IGF1 3	JMD RAPA_IGF1 1	JMD RAPA_IGF1 2	JMD RAPA_IGF1 3	JMD UO126_IGF1 1	JMD UO126_IGF1 2	JMD UO126_IGF1 3	JMD LY14_IGF1 1	JMD LY14_IGF1 2	JMD LY14_IGF1 3
	CREB	0.150337	0.0588723	0.0370575	0.13096	0.103304	0.0831717	0.0700596	0.0706716	0.0613777	0.164827	0.163346	0.174487	0.0455546	0.0496619	0.0338388	0.0382888	0.034799	0.0383206	0.139697	0.151765	0.175726	0.0565367	0.0434686	0.041674	0.0470628	0.133514	0.0369639	0.0326682	0.0442455	0.0310086	0.0461465	0.0520051	0.0583059	0.122512	0.135664	0.0883145	0.159511	0.0963012	0.062591	0.109284	0.0571663	0.0559458	0.0352454	0.0459702	0.0413325	0.0806367	0.0750873	0.0673989
	JNK	0.126082	0.0830742	0.0581609	0.115642	0.113349	0.101093	0.0484412	0.0550449	0.047149	0.219732	0.200906	0.22087	0.0786798	0.0865195	0.0649615	0.368291	0.360804	0.404088	0.119873	0.122235	0.133411	0.0992692	0.0855511	0.0808828	0.0948487	0.138988	0.0758473	0.092698	0.113309	0.0667154	0.24526	0.256216	0.217476	0.0874801	0.0926411	0.0589454	0.0809232	0.0751972	0.0565446	0.06313	0.0482373	0.0413576	0.107211	0.0948999	0.0746967	0.046497	0.0421885	0.0392411
	NFkB	0.00384656	0.00424959	0.00349425	0.0038835	0.00395214	0.00403349	0.00320272	0.00432573	0.00399034	0.00470615	0.00524103	0.0054972	0.00428189	0.00382935	0.00350837	0.00392993	0.00399718	0.00388759	0.00295712	0.00390987	0.00367955	0.00380633	0.00299401	0.00428479	0.0041166	0.00372439	0.00318087	0.00353767	0.00305142	0.00302777	0.00395236	0.00370331	0.00458007	0.00388137	0.00376845	0.00497255	0.00400445	0.00355437	0.0040309	0.00466844	0.00338687	0.00334005	0.00304414	0.0032554	0.00293029	0.00366531	0.00369534	0.00369446
	p38	1.3378	1.24316	0.961057	1.10065	1.17582	1.00996	0.831257	0.837299	0.794708	1.4872	1.51335	1.45308	0.986619	1.09795	0.691942	1.00797	1.14696	1.14429	1.48267	1.43045	1.51463	1.15743	1.0346	0.970359	0.855418	1.11168	0.765932	0.673595	0.832223	0.690123	0.866474	0.838112	0.874794	1.18989	1.3558	1.00663	0.934038	0.959736	0.758706	0.835013	0.804742	0.646495	0.634418	0.707014	0.651655	0.936224	0.851827	0.827958
	ERK1\2	0.0260712	0.0179312	0.012092	0.155717	0.0666374	0.107015	0.151379	0.0737536	0.0745563	0.0209536	0.0233663	0.0296456	0.0168897	0.0216598	0.0179946	0.0351448	0.0343287	0.0634233	0.0221237	0.0203725	0.0287674	0.0186764	0.0189621	0.0191348	0.0195817	0.0272558	0.0151366	0.00834669	0.00844225	0.00824807	0.137798	0.165379	0.135344	0.0170681	0.0183189	0.0143997	0.16891	0.153393	0.0801142	0.16435	0.112588	0.0592367	0.00761035	0.00838512	0.00791692	0.13237	0.0808869	0.0783824
	Akt	0.0784272	0.0454498	0.0875402	0.0294498	0.0262378	0.0299193	0.0253215	0.0263869	0.0259372	0.0258278	0.0247857	0.0293511	0.0258103	0.0217196	0.0199751	0.0200988	0.0198683	0.0213262	0.0210284	0.0235621	0.0211853	0.0242083	0.0205145	0.0250044	0.0217512	0.0198634	0.021608	0.0193466	0.0215633	0.0207768	0.0225391	0.0233309	0.0239296	0.0211485	0.0228201	0.0243966	0.0212458	0.0218816	0.0192588	0.0220159	0.0246318	0.0219068	0.0251142	0.0238729	0.0212832	0.0236674	0.022172	0.025362
	p70S6K	0.0111123	0.0106758	0.00937931	0.0176915	0.019102	0.0189421	0.0124105	0.0157889	0.0155938	0.0100846	0.0115739	0.0133994	0.0115373	0.00933405	0.00905387	0.00909499	0.00975782	0.0111074	0.0085428	0.00915732	0.00858561	0.00964271	0.00914837	0.0105652	0.00956831	0.00857739	0.00844576	0.00834669	0.00874739	0.00803926	0.0169845	0.0179346	0.0182174	0.00945462	0.00999686	0.0104631	0.0111791	0.0113296	0.0105251	0.00880637	0.00841587	0.00766246	0.00894216	0.0103581	0.00930496	0.0127762	0.0115479	0.0130804
	STAT3	0.0146917	0.0160137	0.0131494	0.0471413	0.032166	0.033187	0.0238202	0.0283876	0.0257272	0.0265001	0.0274608	0.0303328	0.0136783	0.0156764	0.0142598	0.0382888	0.0352692	0.0380984	0.013088	0.0149192	0.0153314	0.0142103	0.0139721	0.0153196	0.0121829	0.014954	0.0138752	0.0132663	0.0131211	0.0126331	0.0440635	0.0490953	0.0433821	0.0120422	0.0135036	0.0118616	0.0253615	0.0286571	0.0227298	0.0337401	0.0263766	0.0208262	0.0106545	0.0136135	0.0124409	0.0324641	0.03372	0.0279081
	STAT5	0.00876162	0.0104685	0.0068046	0.0343581	0.0298606	0.035025	0.0291248	0.0349302	0.0331828	0.0112051	0.0123383	0.0135467	0.0116563	0.0111291	0.00882752	0.00965641	0.00999295	0.010441	0.00832375	0.0112666	0.0100351	0.0119773	0.00975826	0.0116218	0.010069	0.00925456	0.00976198	0.00917583	0.00986625	0.00908332	0.0280938	0.0290445	0.0318032	0.0105494	0.0108866	0.0107739	0.0370412	0.0362102	0.0333669	0.0271088	0.0265818	0.0224962	0.013984	0.0268324	0.0229282	0.0302649	0.0287415	0.0351972
[truncated: 48 more columns]

## Sheet: median_sd
MEDIAN
		JMD CTRL 1	JMD TNFa 1	JMD IGF1 1	JMD MIDO_TNFa 1	JMD MIDO_IGF1 1	JMD MIDO_SB_TNFa 1	JMD MIDO_SP_TNFa 1	JMD MIDO_WORT_IGF1 1	JMD MIDO_RAPA_IGF1 1	JMD MIDO_UO126_IGF1 1	JMD SB_TNFa 1	JMD SP_TNFa 1	JMD WORT_IGF1 1	JMD RAPA_IGF1 1	JMD UO126_IGF1 1	JMD LY14_IGF1 1	TKD CTRL 1	TKD TNFa 1	TKD IGF1 1	TKD MIDO_TNFa 1	TKD MIDO_IGF1 1	TKD MIDO_SB_TNFa 1	TKD MIDO_SP_TNFa 1	TKD MIDO_WORT_IGF1 1	TKD MIDO_RAPA_IGF1 1	TKD MIDO_UO126_IGF1 1	TKD SB_TNFa 1	TKD SP_TNFa 1	TKD WORT_IGF1 1	TKD RAPA_IGF1 1	TKD UO126_IGF1 1	TKD LY14_IGF1 1
	CREB	0.0588723	0.103304	0.0700596	0.164827	0.0455546	0.0382888	0.151765	0.0434686	0.0470628	0.0326682	0.0520051	0.122512	0.0963012	0.0571663	0.0413325	0.0750873	0.0383397	0.0931795	0.070796	0.074312	0.0228275	0.0232603	0.114982	0.0279371	0.026127	0.0196339	0.0445792	0.0626008	0.0706684	0.0636282	0.0347884	0.0887161
	JNK	0.0830742	0.113349	0.0484412	0.219732	0.0786798	0.368291	0.122235	0.0855511	0.0948487	0.092698	0.24526	0.0874801	0.0751972	0.0482373	0.0948999	0.0421885	0.0372908	0.0661243	0.0344979	0.103747	0.0370428	0.210784	0.0733677	0.039602	0.0387054	0.0336106	0.17458	0.0421133	0.0311798	0.0262503	0.0526316	0.0265421
	NFkB	0.00384656	0.00395214	0.00399034	0.00524103	0.00382935	0.00392993	0.00367955	0.00380633	0.00372439	0.00305142	0.00395236	0.00388137	0.00400445	0.00338687	0.00304414	0.00369446	0.00325982	0.00302715	0.00418451	0.00350829	0.00342869	0.0037005	0.00301644	0.00381098	0.00297131	0.00283785	0.00372304	0.00338066	0.00306665	0.00256094	0.00335418	0.00335778
	p38	1.24316	1.10065	0.831257	1.4872	0.986619	1.14429	1.48267	1.0346	0.855418	0.690123	0.866474	1.18989	0.934038	0.804742	0.651655	0.851827	0.988628	0.884401	0.679642	1.19986	0.47551	0.819685	1.15905	0.620278	0.423852	0.471072	0.70394	0.923077	0.500045	0.512096	0.571163	0.600546
	ERK1\2	0.0179312	0.107015	0.0745563	0.0233663	0.0179946	0.0351448	0.0221237	0.0189621	0.0195817	0.00834669	0.137798	0.0170681	0.153393	0.112588	0.00791692	0.0808869	0.00965606	0.0176899	0.0175905	0.00938582	0.00814315	0.0113418	0.00914664	0.00933689	0.00737705	0.00646541	0.0467242	0.00834677	0.0146801	0.014451	0.00681115	0.014138
	Akt	0.0784272	0.0294498	0.0259372	0.0258278	0.0217196	0.0200988	0.0211853	0.0242083	0.021608	0.0207768	0.0233309	0.0228201	0.0212458	0.0220159	0.0238729	0.0236674	0.031334	0.0200874	0.0231131	0.0225044	0.0193878	0.022317	0.023791	0.0218595	0.0189714	0.0256874	0.0220098	0.0233749	0.0234082	0.0265828	0.0239859	0.0264646
	p70S6K	0.0106758	0.0189421	0.0155938	0.0115739	0.00933405	0.00975782	0.00858561	0.00964271	0.00857739	0.00834669	0.0179346	0.00999686	0.0111791	0.00841587	0.00930496	0.0127762	0.0076402	0.0151436	0.0137213	0.0086198	0.00701811	0.00897587	0.00744381	0.0077917	0.00665984	0.00717851	0.0103521	0.00714769	0.0103725	0.00599627	0.00813799	0.0116193
	STAT3	0.0146917	0.033187	0.0257272	0.0274608	0.0142598	0.0380984	0.0149192	0.0142103	0.0138752	0.0131211	0.0440635	0.0120422	0.0253615	0.0263766	0.0124409	0.0324641	0.0109405	0.0373647	0.0348385	0.0168862	0.0111433	0.0185506	0.0107035	0.011861	0.00952869	0.00998141	0.03771	0.00878972	0.0163858	0.0249622	0.00969994	0.0328267
	STAT5	0.00876162	0.0343581	0.0331828	0.0123383	0.0111291	0.00999295	0.0100351	0.0116218	0.00976198	0.00917583	0.0290445	0.0107739	0.0362102	0.0265818	0.0229282	0.0302649	0.00539907	0.0369484	0.0396809	0.00620518	0.00567877	0.00667059	0.00574097	0.0067147	0.00533867	0.00508856	0.0303292	0.00701888	0.0279963	0.0258838	0.0237063	0.0325665
SD
		JMD CTRL 1	JMD TNFa 1	JMD IGF1 1	JMD MIDO_TNFa 1	JMD MIDO_IGF1 1	JMD MIDO_SB_TNFa 1	JMD MIDO_SP_TNFa 1	JMD MIDO_WORT_IGF1 1	JMD MIDO_RAPA_IGF1 1	JMD MIDO_UO126_IGF1 1	JMD SB_TNFa 1	JMD SP_TNFa 1	JMD WORT_IGF1 1	JMD RAPA_IGF1 1	JMD UO126_IGF1 1	JMD LY14_IGF1 1	TKD CTRL 1	TKD TNFa 1	TKD IGF1 1	TKD MIDO_TNFa 1	TKD MIDO_IGF1 1	TKD MIDO_SB_TNFa 1	TKD MIDO_SP_TNFa 1	TKD MIDO_WORT_IGF1 1	TKD MIDO_RAPA_IGF1 1	TKD MIDO_UO126_IGF1 1	TKD SB_TNFa 1	TKD SP_TNFa 1	TKD WORT_IGF1 1	TKD RAPA_IGF1 1	TKD UO126_IGF1 1	TKD LY14_IGF1 1
	CREB	0.0601023	0.0239927	0.00519815	0.0060504	0.00821076	0.00202409	0.018339	0.00811272	0.00721118	0.0570237	0.00608106	0.0244419	0.0492023	0.0304485	0.00537869	0.00664764	0.00786044	0.00618051	0.0103947	0.0182788	0.00613452	0.00342943	0.0175361	0.00067693	0.000740194	0.00268901	0.00657528	0.0288284	0.0107701	0.00918872	0.00358292	0.0102376
	JNK	0.0343598	0.00782267	0.00423524	0.011212	0.0109117	0.0231333	0.00723168	0.00955718	0.0233485	0.032694	0.0199698	0.0181487	0.0127477	0.0111292	0.0164159	0.00364916	0.00245542	0.0060357	0.00428133	0.0118071	0.00587497	0.0253397	0.009418	0.00187351	0.00214262	0.00512518	0.0297539	0.00525303	0.00445329	0.00197523	0.00347562	0.00154379
	NFkB	0.00037795	7.50889e-05	0.000576479	0.000403629	0.000388618	5.52623e-05	0.000497103	0.000652547	0.000287808	0.000276161	0.000451804	0.00066499	0.000267817	0.000753792	0.00016497	1.70917e-05	0.000217675	0.000298405	0.000967565	0.000549947	0.000314577	0.000318843	0.000930972	0.000136675	0.000206038	0.00079022	0.000428982	0.000391015	0.000551902	0.000256394	0.000188364	0.000332718
	p38	0.195992	0.0830505	0.0230446	0.0302231	0.209789	0.0794823	0.0424987	0.0950527	0.0872052	0.230933	0.0192318	0.174659	0.109404	0.10124	0.0379295	0.0568829	0.0787752	0.045799	0.0308722	0.125019	0.0511218	0.0546535	0.0101212	0.0773348	0.013726	0.0540499	0.0757907	0.103677	0.0120059	0.0629418	0.0263111	0.0746424
	ERK1\2	0.00702109	0.0446048	0.0445869	0.00448709	0.00249695	0.0165672	0.00442869	0.000231513	9.70958e-05	0.00957891	0.0166777	0.00200187	0.0474258	0.0525587	0.000390187	0.0304724	0.000594529	0.00134814	0.00202959	0.000408989	0.000549556	0.00053047	0.000619914	0.000402523	0.000467699	0.00122805	0.00696334	0.000386335	0.00427068	0.000797519	0.000140267	0.00159012
	Akt	0.0221441	0.00200381	0.000534856	0.00239245	0.00299517	0.000783702	0.00141971	0.00239571	0.00112382	0.00118492	0.000697468	0.00162427	0.0013682	0.00154276	0.00195466	0.001596	0.00399169	0.00523021	0.00146414	0.00217479	0.000578077	0.00152394	0.00226583	0.00490773	0.00117143	0.00196414	0.0034335	0.000858459	0.0149559	0.000433542	0.00421342	0.00085122
	p70S6K	0.000901355	0.000772351	0.00189669	0.00166025	0.00136017	0.00102555	0.000343106	0.000719138	0.000355091	0.000115734	0.000645862	0.000504703	0.000427665	0.000581469	0.00073548	0.000811331	0.00121835	0.00376513	0.00165404	0.000835065	0.00154752	0.00102206	0.00169542	0.000756576	0.000367273	0.000422366	0.0012191	0.000758117	0.000967329	0.00202736	0.000698314	0.000747477
	STAT3	0.00143354	0.00836686	0.002294	0.00199419	0.00102774	0.00169107	0.00119417	0.000719161	0.00033168	0.000854706	0.00312052	0.000900422	0.00296984	0.00647812	0.00149007	0.0030581	0.00166808	0.00823918	0.00556714	0.00122182	0.000634889	0.00215098	0.00101627	0.000400414	0.00111433	0.000900528	0.00248175	0.000561102	0.00198417	0.00285392	0.000175472	0.00449736
	STAT5	0.00183337	0.00280904	0.0029784	0.00117099	0.00150426	0.000393594	0.00147793	0.00119185	0.000427826	0.000318133	0.00192674	0.00017169	0.00192676	0.00252474	0.00658688	0.0033745	0.000170076	0.0139574	0.00462941	0.00064738	4.85978e-05	0.000649864	0.000719579	0.00031984	0.000158554	0.000951587	0.000606519	9.60403e-05	0.00725948	0.00277372	0.00574615	0.00420013
