# Supplementary material for: Unveiling the signaling network of FLT3-ITD AML improves drug sensitivity prediction
Source: eLife. 2024 Apr 2;12:RP90532. doi: 10.7554/eLife.90532 (PMC10987088; doi:10.7554/eLife.90532)
Supplement: Supplementary file 6. [file elife-90532-supp6.xlsx]

## Sheet: description
Supplementary file 6
This spreadsheet contains the data used for the validation of FLT3 ITDs Boolean models using independent resources.
AC220_FLT3-ITD sheets report the data of Massacci et. al (36509894)
BEAT-AML_selected_ITD_drugs sheet reports the data of drug sensitivity of beatAML consortium (https://registry.opendata.aws/beataml)
AC220_FLT3-ITD JMD
Comparison of Sentinel states upon FLT3 inhibition with Massacci et. al phosphoproteomic data upon FLT3 inhibition, for FLT3 ITD-JMD BAF3 cell line.
AC220_FLT3-ITD TKD
Comparison of Sentinel states upon FLT3 inhibition with Massacci et. al phosphoproteomic data upon FLT3 inhibition, for FLT3 ITD-TKD BAF3 cell line.
BEAT-AML_selected_ITD_drugs
Table reporting for each drug inihibiting a sentinel of the model the IC50 of clinically assessed FLT3 ITD-JMD patients.

## Sheet: AC220_FLT3-ITD JMD
Sentinel	Phosphosite	Mode of Regulation	AC220_Ctrl Fold Change	Significant	Functional impact in quizartinib dataset	Model simulation of FLT3 inhibition	Consensus
Mapk1	T183	1	-0.74538		-0.74538	0	x
Mapk3	T203	1	-1.98369	+	-1.98369	0	x
Mapk1	Y185	1	-1.98206	+	-1.98206	0	x
Mapk3	Y205	1	-0.657539		-0.657539	0	x
Mapk14	T180	1	-1.3205	+	-1.3205	1
Mapk14	Y182	1	0.0445602		0.0445602	1	x
Rps6	S235	1	-1.30227		-1.30227	0	x
Rps6	S236	1	-2.66547	+	-2.66547	0	x
Tsc2	S939	-1	-0.381058		0.381058	1	x
Gsk3b	S9	-1	-0.726108		0.726108	1	x

## Sheet: AC220_FLT3-ITD TKD
Sentinel	Phosphosite	Mode of Regulation	AC220_Ctrl Fold Change	Significant	Functional impact in quizartinib dataset	Model simulation of FLT3 inhibition	Consensus
Mapk1	Y185	1	-1.29844		-1.29844	0	x
Mapk14	T180	1	-0.780659		-0.780659	1
Rps6	S235	1	-3.29705		-3.29705	0	x
Rps6	S236	1	-3.56425		-3.56425	0	x
Tsc2	S939	-1	-0.526276		0.526276	1	x

## Sheet: BEAT-AML_selected_ITD_drugs
C: dbgap_subject_id	C: inhibitor	C: Target	N: ic50
2476	Crenolanib	FLT3	0.0137
2476	Sorafenib	FLT3	0.0137
2157	Rapamycin	mTOR	10
2157	Sorafenib	FLT3	0.105764
2374	Rapamycin	mTOR	10
2374	Sorafenib	FLT3	0.764401
2374	AKT Inhibitor IV	AKT	0.297079
2374	BEZ235	PI3K	0.886051
2374	Crenolanib	FLT3	10
2374	GDC-0941	PI3K	2.57137
2374	INK-128	mTOR	0.0534384
2374	JNK Inhibitor II	JNK	50
2374	MK-2206	AKT	10
2374	Midostaurin	FLT3	10
2374	PI-103	PI3K	0.598851
2374	PP242	mTOR	0.0159143
2374	Rapamycin	mTOR	10
2374	S31-201	Stat3	10
2374	SB-202190	p38	10
2374	Sorafenib	FLT3	4.59339
2374	p38 MAP Kinase Inhibitor	p38	10
2059	AKT Inhibitor IV	AKT	0.699308
2059	Crenolanib	FLT3	6.45899
2059	GDC-0941	PI3K	0.612512
2059	INK-128	mTOR	0.133798
2059	JNK Inhibitor II	JNK	50
2059	MEK1/2 Inhibitor	MEK1/2	10
2059	Midostaurin	FLT3	4.13513
2059	PD98059	MEK1/2	10
2059	PI-103	PI3K	1.32333
2059	PP242	mTOR	0.261895
2059	Rapamycin	mTOR	10
2059	SB-202190	p38	10
2059	Sorafenib	FLT3	2.5935
2059	p38 MAP Kinase Inhibitor	p38	10
2059	Rapamycin	mTOR	0.0137
2059	Sorafenib	FLT3	0.614535
2762	AKT Inhibitor IV	AKT	0.561861
2762	BEZ235	PI3K	4.52851
2762	Crenolanib	FLT3	0.491776
2762	GDC-0941	PI3K	0.457374
2762	INK-128	mTOR	0.0271352
2762	JNK Inhibitor II	JNK	8.73822
2762	MK-2206	AKT	0.697561
2762	Midostaurin	FLT3	0.315298
2762	PI-103	PI3K	0.308352
2762	PP242	mTOR	0.263437
2762	Rapamycin	mTOR	10
2762	S31-201	Stat3	10
2762	SB-202190	p38	10
2762	Sorafenib	FLT3	1.092
2762	p38 MAP Kinase Inhibitor	p38	10
2466	AKT Inhibitor IV	AKT	2.23802
2466	BEZ235	PI3K	10
2466	Crenolanib	FLT3	10
2466	GDC-0941	PI3K	3.29476
2466	INK-128	mTOR	1.47859
2466	JNK Inhibitor II	JNK	50
2466	MK-2206	AKT	10
2466	Midostaurin	FLT3	10
2466	PI-103	PI3K	3.12961
2466	PP242	mTOR	3.46231
2466	Rapamycin	mTOR	10
2466	S31-201	Stat3	10
2466	SB-202190	p38	10
2466	Sorafenib	FLT3	10
2466	p38 MAP Kinase Inhibitor	p38	10
2097	AKT Inhibitor IV	AKT	1.00025
2097	BEZ235	PI3K	8.40111
2097	Crenolanib	FLT3	0.669087
2097	GDC-0941	PI3K	2.14216
2097	INK-128	mTOR	0.432123
2097	JNK Inhibitor II	JNK	35.3121
2097	MK-2206	AKT	10
2097	Midostaurin	FLT3	0.196815
2097	PI-103	PI3K	2.63552
2097	PP242	mTOR	1.95329
2097	Rapamycin	mTOR	10
2097	S31-201	Stat3	10
2097	SB-202190	p38	10
2097	Sorafenib	FLT3	0.497319
2097	p38 MAP Kinase Inhibitor	p38	10
2022	AKT Inhibitor IV	AKT	0.500718
2022	BEZ235	PI3K	0.0137
2022	Crenolanib	FLT3	0.0137
2022	GDC-0941	PI3K	1.4442
2022	INK-128	mTOR	0.0729489
2022	JNK Inhibitor II	JNK	5.78405
2022	MK-2206	AKT	10
2022	Midostaurin	FLT3	0.0137
2022	PI-103	PI3K	3.23803
2022	PP242	mTOR	0.375048
2022	Rapamycin	mTOR	10
2022	S31-201	Stat3	10
2022	SB-202190	p38	10
2022	Sorafenib	FLT3	0.756878
2022	p38 MAP Kinase Inhibitor	p38	10
2543	Rapamycin	mTOR	10
2543	Sorafenib	FLT3	10
2245	AKT Inhibitor IV	AKT	0.163089
2245	BEZ235	PI3K	0.109381
2245	Crenolanib	FLT3	10
2245	GDC-0941	PI3K	0.556302
2245	INK-128	mTOR	0.00808069
2245	JNK Inhibitor II	JNK	42.9098
2245	MK-2206	AKT	1.44257
2245	Midostaurin	FLT3	2.19546
2245	PI-103	PI3K	0.308803
2245	PP242	mTOR	0.0514567
2245	Rapamycin	mTOR	10
2245	S31-201	Stat3	10
2245	SB-202190	p38	0.867937
2245	Sorafenib	FLT3	2.66808
2245	p38 MAP Kinase Inhibitor	p38	2.1119
2179	AKT Inhibitor IV	AKT	0.150075
2179	BEZ235	PI3K	0.104187
2179	Crenolanib	FLT3	6.7864
2179	GDC-0941	PI3K	1.25003
2179	INK-128	mTOR	0.00686
2179	JNK Inhibitor II	JNK	1.28715
2179	MK-2206	AKT	10
2179	Midostaurin	FLT3	4.95374
2179	PI-103	PI3K	0.654854
2179	PP242	mTOR	0.0314121
2179	Rapamycin	mTOR	1.74964
2179	S31-201	Stat3	0.765645
2179	SB-202190	p38	10
2179	Sorafenib	FLT3	10
2179	p38 MAP Kinase Inhibitor	p38	0.220739
2248	AKT Inhibitor IV	AKT	0.0921506
2248	BEZ235	PI3K	3.46454
2248	Crenolanib	FLT3	0.276387
2248	GDC-0941	PI3K	0.26098
2248	INK-128	mTOR	0.0443442
2248	JNK Inhibitor II	JNK	9.62431
2248	MK-2206	AKT	0.0991274
2248	Midostaurin	FLT3	0.112849
2248	PI-103	PI3K	0.0892446
2248	Rapamycin	mTOR	3.90568
2248	S31-201	Stat3	10
2248	SB-202190	p38	0.0391533
2248	Sorafenib	FLT3	0.304916
2248	p38 MAP Kinase Inhibitor	p38	1.29399
2248	Rapamycin	mTOR	10
2248	Sorafenib	FLT3	1.05659
2047	AKT Inhibitor IV	AKT	0.571011
2047	BEZ235	PI3K	0.163796
2047	Crenolanib	FLT3	1.50347
2047	GDC-0941	PI3K	0.54793
2047	INK-128	mTOR	0.0283564
2047	JNK Inhibitor II	JNK	7.06078
2047	MK-2206	AKT	6.62607
2047	Midostaurin	FLT3	2.6188
2047	PI-103	PI3K	0.284382
2047	PP242	mTOR	0.0155032
2047	Rapamycin	mTOR	0.120115
2047	S31-201	Stat3	10
2047	SB-202190	p38	10
2047	Sorafenib	FLT3	1.52543
2047	p38 MAP Kinase Inhibitor	p38	10
2270	AKT Inhibitor IV	AKT	1.60936
2270	BEZ235	PI3K	10
2270	Crenolanib	FLT3	10
2270	GDC-0941	PI3K	0.978155
2270	INK-128	mTOR	0.447078
2270	JNK Inhibitor II	JNK	21.9785
2270	MK-2206	AKT	10
2270	Midostaurin	FLT3	10
2270	PI-103	PI3K	1.1175
2270	PP242	mTOR	2.06097
2270	Rapamycin	mTOR	10
2270	S31-201	Stat3	10
2270	SB-202190	p38	10
2270	Sorafenib	FLT3	10
2270	p38 MAP Kinase Inhibitor	p38	10
2270	BEZ235	PI3K	10
2270	Crenolanib	FLT3	0.0137
2270	GDC-0941	PI3K	0.222786
2270	INK-128	mTOR	0.0366144
2270	PI-103	PI3K	0.0621343
2270	Rapamycin	mTOR	10
2270	Sorafenib	FLT3	0.0354258
2777	Crenolanib	FLT3	10
2777	GDC-0941	PI3K	0.108844
2777	PP242	mTOR	0.0137
2777	Rapamycin	mTOR	4.4007
2777	Sorafenib	FLT3	9.84301
2297	AKT Inhibitor IV	AKT	1.5642
2297	BEZ235	PI3K	1.45663
2297	Crenolanib	FLT3	0.0525118
2297	GDC-0941	PI3K	1.53047
2297	INK-128	mTOR	0.0920637
2297	JNK Inhibitor II	JNK	6.36203
2297	MK-2206	AKT	10
2297	Midostaurin	FLT3	0.0137
2297	PI-103	PI3K	1.0486
2297	PP242	mTOR	1.58343
2297	Rapamycin	mTOR	10
2297	S31-201	Stat3	10
2297	SB-202190	p38	10
2297	Sorafenib	FLT3	0.0137
2297	p38 MAP Kinase Inhibitor	p38	10
2305	AKT Inhibitor IV	AKT	0.193371
2305	Crenolanib	FLT3	10
2305	GDC-0941	PI3K	0.348811
2305	INK-128	mTOR	0.00760294
2305	JNK Inhibitor II	JNK	3.86058
2305	MK-2206	AKT	10
2305	Midostaurin	FLT3	2.78451
2305	PI-103	PI3K	0.547071
2305	PP242	mTOR	0.0648702
2305	S31-201	Stat3	10
2305	SB-202190	p38	10
2305	Sorafenib	FLT3	10
2305	p38 MAP Kinase Inhibitor	p38	10
2459	AKT Inhibitor IV	AKT	0.499259
2459	BEZ235	PI3K	3.43839
2459	Crenolanib	FLT3	10
2459	GDC-0941	PI3K	0.495356
2459	INK-128	mTOR	0.00686
2459	JNK Inhibitor II	JNK	50
2459	MK-2206	AKT	10
2459	Midostaurin	FLT3	10
2459	PI-103	PI3K	0.4018
2459	PP242	mTOR	1.2656
2459	Rapamycin	mTOR	10
2459	S31-201	Stat3	10
2459	SB-202190	p38	10
2459	Sorafenib	FLT3	10
2459	p38 MAP Kinase Inhibitor	p38	10
2457	BEZ235	PI3K	0.966616
2457	GDC-0941	PI3K	0.42904
2457	INK-128	mTOR	0.0696814
2457	MK-2206	AKT	0.0137
2457	Midostaurin	FLT3	0.226749
2457	PI-103	PI3K	0.303469
2457	PP242	mTOR	0.808041
2457	Rapamycin	mTOR	10
2457	S31-201	Stat3	10
2457	Sorafenib	FLT3	3.66856
2385	BEZ235	PI3K	0.113092
2385	GDC-0941	PI3K	0.359552
2385	INK-128	mTOR	0.00686
2385	MK-2206	AKT	10
2385	Midostaurin	FLT3	2.14146
2385	PI-103	PI3K	0.0137
2385	PP242	mTOR	0.0998248
2385	Rapamycin	mTOR	0.0137
2385	S31-201	Stat3	0.0291644
2385	Sorafenib	FLT3	0.0552464
2558	BEZ235	PI3K	0.0556685
2558	Crenolanib	FLT3	0.0972047
2558	GDC-0941	PI3K	0.306124
2558	INK-128	mTOR	0.0132876
2558	MK-2206	AKT	1.63192
2558	Midostaurin	FLT3	1.01545
2558	PI-103	PI3K	0.0137
2558	PP242	mTOR	0.333299
2558	Rapamycin	mTOR	10
2558	S31-201	Stat3	10
2558	Sorafenib	FLT3	0.0137906
2455	BEZ235	PI3K	0.721789
2455	Crenolanib	FLT3	10
2455	GDC-0941	PI3K	0.273847
2455	INK-128	mTOR	0.127095
2455	MK-2206	AKT	0.038556
2455	Midostaurin	FLT3	0.0137
2455	PI-103	PI3K	0.15983
2455	PP242	mTOR	1.68178
2455	Rapamycin	mTOR	10
2455	S31-201	Stat3	10
2455	Sorafenib	FLT3	0.164939
2178	BEZ235	PI3K	0.0137
2178	GDC-0941	PI3K	0.0262349
2178	INK-128	mTOR	0.0122903
2178	MK-2206	AKT	0.0137
2178	Midostaurin	FLT3	0.0137
2178	PI-103	PI3K	0.0137
2178	PP242	mTOR	0.633979
2178	S31-201	Stat3	0.0137
2225	AKT Inhibitor IV	AKT	0.541719
2225	BEZ235	PI3K	10
2225	Crenolanib	FLT3	10
2225	GDC-0941	PI3K	10
2225	INK-128	mTOR	0.719906
2225	JNK Inhibitor II	JNK	50
2225	MK-2206	AKT	10
2225	Midostaurin	FLT3	10
2225	PI-103	PI3K	5.75599
2225	PP242	mTOR	10
2225	Rapamycin	mTOR	10
2225	S31-201	Stat3	10
2225	SB-202190	p38	10
2225	Sorafenib	FLT3	10
2225	p38 MAP Kinase Inhibitor	p38	10
2225	Crenolanib	FLT3	10
2225	GDC-0941	PI3K	10
2225	INK-128	mTOR	0.694737
2225	MK-2206	AKT	10
2225	Midostaurin	FLT3	10
2225	PI-103	PI3K	4.03335
2225	PP242	mTOR	0.900313
2225	Rapamycin	mTOR	10
2225	S31-201	Stat3	5.153
2225	Sorafenib	FLT3	10
2409	BEZ235	PI3K	0.393631
2409	Crenolanib	FLT3	10
2409	GDC-0941	PI3K	1.47889
2409	INK-128	mTOR	0.429375
2409	MK-2206	AKT	10
2409	Midostaurin	FLT3	10
2409	PI-103	PI3K	0.300129
2409	PP242	mTOR	0.998737
2409	Rapamycin	mTOR	10
2409	S31-201	Stat3	10
2409	Sorafenib	FLT3	10
2409	BEZ235	PI3K	0.17958
2409	Crenolanib	FLT3	10
2409	GDC-0941	PI3K	0.229343
2409	Gilteritinib	FLT3	0.0137
2409	INK-128	mTOR	0.02413
2409	MK-2206	AKT	10
2409	Midostaurin	FLT3	4.89997
2409	PI-103	PI3K	0.0603095
2409	PP242	mTOR	0.0719651
2409	Rapamycin	mTOR	0.0588173
2409	S31-201	Stat3	10
2409	Sorafenib	FLT3	0.478661
2069	BEZ235	PI3K	10
2069	Crenolanib	FLT3	0.328933
2069	GDC-0941	PI3K	10
2069	INK-128	mTOR	0.00686
2069	MK-2206	AKT	5.1389
2069	Midostaurin	FLT3	0.0455118
2069	PI-103	PI3K	0.548198
2069	PP242	mTOR	10
2069	Rapamycin	mTOR	0.0548111
2069	S31-201	Stat3	10
2069	Sorafenib	FLT3	10
2170	BEZ235	PI3K	0.0137
2170	Crenolanib	FLT3	0.390439
2170	GDC-0941	PI3K	0.457073
2170	INK-128	mTOR	0.00686
2170	MK-2206	AKT	0.0137
2170	Midostaurin	FLT3	0.16584
2170	PI-103	PI3K	0.03619
2170	PP242	mTOR	0.0892553
2170	Rapamycin	mTOR	0.0137
2170	S31-201	Stat3	10
2170	Sorafenib	FLT3	1.20472
2342	BEZ235	PI3K	0.0412143
2342	Crenolanib	FLT3	9.39288
2342	GDC-0941	PI3K	0.0262619
2342	INK-128	mTOR	0.00686
2342	MK-2206	AKT	0.1756
2342	Midostaurin	FLT3	2.01443
2342	PI-103	PI3K	0.131527
2342	PP242	mTOR	0.062689
2342	Rapamycin	mTOR	0.0137
2342	S31-201	Stat3	10
2342	Sorafenib	FLT3	1.83954
2327	BEZ235	PI3K	0.493479
2327	Crenolanib	FLT3	10
2327	GDC-0941	PI3K	0.363605
2327	INK-128	mTOR	0.017368
2327	MK-2206	AKT	10
2327	Midostaurin	FLT3	10
2327	PI-103	PI3K	0.184283
2327	PP242	mTOR	10
2327	Rapamycin	mTOR	0.0159748
2327	S31-201	Stat3	10
2327	Sorafenib	FLT3	10
2236	BEZ235	PI3K	0.0137
2236	Crenolanib	FLT3	10
2236	GDC-0941	PI3K	0.471147
2236	INK-128	mTOR	5
2236	MK-2206	AKT	10
2236	Midostaurin	FLT3	0.643834
2236	PI-103	PI3K	0.112061
2236	PP242	mTOR	0.443419
2236	S31-201	Stat3	0.04947
2236	Sorafenib	FLT3	10
2133	BEZ235	PI3K	0.377631
2133	Crenolanib	FLT3	10
2133	GDC-0941	PI3K	0.735722
2133	INK-128	mTOR	0.0634363
2133	MK-2206	AKT	10
2133	Midostaurin	FLT3	0.0254891
2133	PI-103	PI3K	0.739613
2133	PP242	mTOR	0.107281
2133	Rapamycin	mTOR	10
2133	S31-201	Stat3	10
2133	Sorafenib	FLT3	0.0486455
2291	BEZ235	PI3K	0.0553193
2291	Crenolanib	FLT3	10
2291	GDC-0941	PI3K	0.03209
2291	INK-128	mTOR	0.00686
2291	MK-2206	AKT	0.491452
2291	Midostaurin	FLT3	0.745301
2291	PI-103	PI3K	0.0448056
2291	PP242	mTOR	0.031704
2291	Rapamycin	mTOR	0.0137
2291	S31-201	Stat3	10
2291	Sorafenib	FLT3	0.435595
2039	Rapamycin	mTOR	0.0162403
2039	Sorafenib	FLT3	0.971087
2371	BEZ235	PI3K	0.643026
2371	Crenolanib	FLT3	0.0137
2371	GDC-0941	PI3K	0.419806
2371	INK-128	mTOR	0.25581
2371	MK-2206	AKT	10
2371	Midostaurin	FLT3	0.494051
2371	PI-103	PI3K	0.381084
2371	PP242	mTOR	1.06569
2371	Rapamycin	mTOR	10
2371	S31-201	Stat3	10
2371	Sorafenib	FLT3	0.0137
2420	BEZ235	PI3K	0.266792
2420	Crenolanib	FLT3	10
2420	GDC-0941	PI3K	4.22166
2420	Gilteritinib	FLT3	0.0212498
2420	INK-128	mTOR	0.0818939
2420	MK-2206	AKT	10
2420	Midostaurin	FLT3	10
2420	PI-103	PI3K	0.0562387
2420	PP242	mTOR	0.467192
2420	Rapamycin	mTOR	10
2420	S31-201	Stat3	10
2420	Sorafenib	FLT3	10
2044	BEZ235	PI3K	0.862692
2044	Crenolanib	FLT3	10
2044	GDC-0941	PI3K	0.130176
2044	Gilteritinib	FLT3	0.0137
2044	INK-128	mTOR	0.00825046
2044	MK-2206	AKT	10
2044	Midostaurin	FLT3	0.160986
2044	PI-103	PI3K	0.041499
2044	PP242	mTOR	0.848495
2044	Rapamycin	mTOR	2.92029
2044	S31-201	Stat3	10
2044	BEZ235	PI3K	0.62814
2044	Crenolanib	FLT3	10
2044	GDC-0941	PI3K	0.344242
2044	Gilteritinib	FLT3	0.995067
2044	INK-128	mTOR	0.0276293
2044	MK-2206	AKT	10
2044	Midostaurin	FLT3	1.87687
2044	PI-103	PI3K	0.185892
2044	PP242	mTOR	0.0621376
2044	Rapamycin	mTOR	10
2044	S31-201	Stat3	10
2044	Sorafenib	FLT3	0.0539151
2074	BEZ235	PI3K	1.03026
2074	Crenolanib	FLT3	0.217991
2074	GDC-0941	PI3K	0.219868
2074	Gilteritinib	FLT3	0.0137
2074	INK-128	mTOR	0.0136745
2074	MK-2206	AKT	0.0137
2074	Midostaurin	FLT3	0.0137
2074	PI-103	PI3K	0.290133
2074	PP242	mTOR	0.0200444
2074	Rapamycin	mTOR	10
2074	S31-201	Stat3	10
2074	Sorafenib	FLT3	0.0137
2201	Crenolanib	FLT3	0.315967
2201	Rapamycin	mTOR	0.0137
2201	Sorafenib	FLT3	0.339062
2590	BEZ235	PI3K	0.975387
2590	Crenolanib	FLT3	0.0137
2590	GDC-0941	PI3K	0.229646
2590	Gilteritinib	FLT3	0.0137
2590	INK-128	mTOR	0.0461596
2590	MK-2206	AKT	10
2590	Midostaurin	FLT3	0.0137
2590	PI-103	PI3K	0.384816
2590	PP242	mTOR	0.0533727
2590	Rapamycin	mTOR	10
2590	S31-201	Stat3	10
2590	Sorafenib	FLT3	0.0137
2196	BEZ235	PI3K	0.0740981
2196	GDC-0941	PI3K	0.0137
2196	INK-128	mTOR	0.00686
2196	MK-2206	AKT	10
2196	Midostaurin	FLT3	10
2196	PI-103	PI3K	0.0137
2196	PP242	mTOR	0.0137
2196	Rapamycin	mTOR	0.0137
2196	S31-201	Stat3	0.0137
2196	Sorafenib	FLT3	0.0137
2210	BEZ235	PI3K	0.666603
2210	Crenolanib	FLT3	10
2210	GDC-0941	PI3K	0.215704
2210	Gilteritinib	FLT3	0.213528
2210	INK-128	mTOR	0.36451
2210	MK-2206	AKT	2.95605
2210	Midostaurin	FLT3	0.038897
2210	PI-103	PI3K	0.286873
2210	PP242	mTOR	0.0373385
2210	Rapamycin	mTOR	1.77755
2210	S31-201	Stat3	10
2210	Sorafenib	FLT3	0.0137
2319	Crenolanib	FLT3	0.0236016
2319	GDC-0941	PI3K	0.0229722
2319	Gilteritinib	FLT3	0.288343
2319	INK-128	mTOR	0.010902
2319	Midostaurin	FLT3	0.864698
2319	PI-103	PI3K	0.199427
2319	PP242	mTOR	0.150227
2319	Rapamycin	mTOR	0.0284053
2319	S31-201	Stat3	6.44837
2319	Sorafenib	FLT3	0.2634
2232	BEZ235	PI3K	0.241174
2232	Crenolanib	FLT3	0.168233
2232	GDC-0941	PI3K	0.593824
2232	Gilteritinib	FLT3	0.0137
2232	INK-128	mTOR	0.0716619
2232	MK-2206	AKT	10
2232	Midostaurin	FLT3	0.0137
2232	PI-103	PI3K	0.0638699
2232	PP242	mTOR	0.0583072
2232	Rapamycin	mTOR	0.247408
2232	S31-201	Stat3	10
2232	Sorafenib	FLT3	0.0137
2031	BEZ235	PI3K	0.3606
2031	Gilteritinib	FLT3	0.0137
2031	INK-128	mTOR	0.00686
2031	MK-2206	AKT	10
2031	Midostaurin	FLT3	0.0137
2031	PI-103	PI3K	0.0137
2031	PP242	mTOR	0.0137
2031	Rapamycin	mTOR	0.0137
2031	S31-201	Stat3	0.632117
2031	Sorafenib	FLT3	0.0137
2061	BEZ235	PI3K	0.150793
2061	Crenolanib	FLT3	0.261841
2061	GDC-0941	PI3K	0.0384943
2061	Gilteritinib	FLT3	0.111739
2061	INK-128	mTOR	0.00686
2061	MK-2206	AKT	1.14472
2061	Midostaurin	FLT3	10
2061	PI-103	PI3K	0.0137
2061	PP242	mTOR	0.0466664
2061	Rapamycin	mTOR	2.66808
2061	S31-201	Stat3	10
2061	Sorafenib	FLT3	0.668206
2471	BEZ235	PI3K	1.20283
2471	Crenolanib	FLT3	0.208022
2471	GDC-0941	PI3K	10
2471	Gilteritinib	FLT3	0.0137
2471	INK-128	mTOR	0.0301797
2471	MK-2206	AKT	10
2471	Midostaurin	FLT3	10
2471	PI-103	PI3K	0.587794
2471	PP242	mTOR	0.134627
2471	Rapamycin	mTOR	10
2471	S31-201	Stat3	10
2471	Sorafenib	FLT3	0.0216059
2522	BEZ235	PI3K	0.316175
2522	Crenolanib	FLT3	0.198117
2522	GDC-0941	PI3K	0.22619
2522	Gilteritinib	FLT3	0.167018
2522	INK-128	mTOR	0.00686
2522	MK-2206	AKT	2.99635
2522	Midostaurin	FLT3	2.01371
2522	PI-103	PI3K	0.193381
2522	PP242	mTOR	0.202167
2522	Rapamycin	mTOR	9.59948
2522	S31-201	Stat3	10
2522	Sorafenib	FLT3	1.18738
2522	Sorafenib	FLT3	0.0511451
2046	BEZ235	PI3K	10
2046	Crenolanib	FLT3	10
2046	GDC-0941	PI3K	3.88769
2046	Gilteritinib	FLT3	2.31852
2046	INK-128	mTOR	0.600058
2046	MK-2206	AKT	10
2046	Midostaurin	FLT3	10
2046	PI-103	PI3K	4.21746
2046	PP242	mTOR	6.02209
2046	Rapamycin	mTOR	10
2046	S31-201	Stat3	10
2046	Sorafenib	FLT3	10
2052	BEZ235	PI3K	0.0546023
2052	Crenolanib	FLT3	0.838314
2052	GDC-0941	PI3K	0.0712569
2052	Gilteritinib	FLT3	0.050967
2052	INK-128	mTOR	0.00686
2052	MK-2206	AKT	0.0370798
2052	Midostaurin	FLT3	0.185817
2052	PI-103	PI3K	0.0137
2052	PP242	mTOR	0.0186601
2052	Rapamycin	mTOR	0.0137
2052	Sorafenib	FLT3	0.172161
2318	BEZ235	PI3K	1.82264
2318	GDC-0941	PI3K	0.118855
2318	Gilteritinib	FLT3	0.0137
2318	INK-128	mTOR	0.0292101
2318	MK-2206	AKT	10
2318	Midostaurin	FLT3	0.609956
2318	PI-103	PI3K	0.0285827
2318	PP242	mTOR	0.416969
2318	Rapamycin	mTOR	0.165702
2318	S31-201	Stat3	4.53023
2318	Sorafenib	FLT3	0.0137
2549	BEZ235	PI3K	1.4333
2549	Crenolanib	FLT3	10
2549	GDC-0941	PI3K	0.580278
2549	Gilteritinib	FLT3	3.09998
2549	INK-128	mTOR	0.0421233
2549	MK-2206	AKT	3.34665
2549	Midostaurin	FLT3	10
2549	PI-103	PI3K	0.992042
2549	PP242	mTOR	0.190057
2549	Rapamycin	mTOR	10
2549	S31-201	Stat3	10
2549	Sorafenib	FLT3	0.378775
2209	BEZ235	PI3K	0.0287121
2209	Crenolanib	FLT3	1.04827
2209	Gilteritinib	FLT3	0.116681
2209	INK-128	mTOR	0.00686
2209	MK-2206	AKT	10
2209	Midostaurin	FLT3	3.19168
2209	PI-103	PI3K	0.0460312
2209	PP242	mTOR	0.0280578
2209	Rapamycin	mTOR	0.0137
2209	S31-201	Stat3	0.0137
2209	Sorafenib	FLT3	10
2556	Crenolanib	FLT3	10
2556	GDC-0941	PI3K	0.103147
2556	Gilteritinib	FLT3	0.063642
2556	INK-128	mTOR	0.0312115
2556	MK-2206	AKT	0.479925
2556	Midostaurin	FLT3	1.71915
2556	PI-103	PI3K	0.154699
2556	PP242	mTOR	0.0452299
2556	Rapamycin	mTOR	0.0137
2556	S31-201	Stat3	2.31699
2556	Sorafenib	FLT3	3.82414
2556	Sorafenib	FLT3	0.820813
2542	BEZ235	PI3K	0.341397
2542	Crenolanib	FLT3	10
2542	GDC-0941	PI3K	0.105069
2542	Gilteritinib	FLT3	0.0551814
2542	INK-128	mTOR	0.00686
2542	MK-2206	AKT	1.11513
2542	Midostaurin	FLT3	0.176387
2542	PI-103	PI3K	0.176487
2542	PP242	mTOR	0.0516738
2542	Rapamycin	mTOR	0.0137
2542	S31-201	Stat3	0.541689
2542	Sorafenib	FLT3	1.04344
2255	BEZ235	PI3K	0.0942
2255	Gilteritinib	FLT3	0.0137
2255	INK-128	mTOR	0.259595
2255	MK-2206	AKT	10
2255	Midostaurin	FLT3	0.0137
2255	PI-103	PI3K	0.0137
2255	PP242	mTOR	0.0138512
2255	Rapamycin	mTOR	0.0137
2255	S31-201	Stat3	0.0525118
2224	BEZ235	PI3K	0.683804
2224	Crenolanib	FLT3	0.288298
2224	GDC-0941	PI3K	0.16054
2224	INK-128	mTOR	0.0131893
2224	Midostaurin	FLT3	0.639457
2224	PI-103	PI3K	0.0137
2224	PP242	mTOR	0.0267336
2224	Rapamycin	mTOR	0.0437466
2224	S31-201	Stat3	5.54733
2224	Sorafenib	FLT3	0.577987
2224	BEZ235	PI3K	10
2224	Crenolanib	FLT3	10
2224	Gilteritinib	FLT3	10
2224	INK-128	mTOR	5
2224	MK-2206	AKT	10
2224	Midostaurin	FLT3	10
2224	PI-103	PI3K	10
2224	PP242	mTOR	0.94037
2224	Rapamycin	mTOR	0.88722
2224	S31-201	Stat3	0.0324044
2224	Sorafenib	FLT3	2.99438
2224	BEZ235	PI3K	0.0137
2224	Crenolanib	FLT3	0.0137
2224	GDC-0941	PI3K	0.0137
2224	Gilteritinib	FLT3	0.0137
2224	INK-128	mTOR	0.00686
2224	MK-2206	AKT	1.62031
2224	Midostaurin	FLT3	0.0141778
2224	PI-103	PI3K	0.0721808
2224	PP242	mTOR	0.999323
2224	Rapamycin	mTOR	0.0137
2224	S31-201	Stat3	0.0385873
2224	Sorafenib	FLT3	0.0886926
2555	BEZ235	PI3K	0.725745
2555	Crenolanib	FLT3	1.6445
2555	GDC-0941	PI3K	0.207064
2555	Gilteritinib	FLT3	0.0137
2555	INK-128	mTOR	0.053162
2555	MK-2206	AKT	10
2555	Midostaurin	FLT3	0.0212193
2555	PI-103	PI3K	0.193761
2555	PP242	mTOR	0.0837078
2555	Rapamycin	mTOR	10
2555	S31-201	Stat3	10
2555	Sorafenib	FLT3	0.0144706
2307	BEZ235	PI3K	1.71801
2307	Crenolanib	FLT3	10
2307	GDC-0941	PI3K	0.770472
2307	Gilteritinib	FLT3	10
2307	INK-128	mTOR	0.352553
2307	MK-2206	AKT	10
2307	Midostaurin	FLT3	10
2307	PI-103	PI3K	0.623422
2307	PP242	mTOR	0.161708
2307	Rapamycin	mTOR	0.0877041
2307	S31-201	Stat3	1.54546
2307	Sorafenib	FLT3	0.760881
2431	BEZ235	PI3K	10
2431	Crenolanib	FLT3	0.15
2431	GDC-0941	PI3K	1.85975
2431	Gilteritinib	FLT3	0.0137
2431	INK-128	mTOR	0.267852
2431	MK-2206	AKT	10
2431	Midostaurin	FLT3	10
2431	PI-103	PI3K	10
2431	PP242	mTOR	0.756198
2431	Rapamycin	mTOR	10
2431	S31-201	Stat3	10
2431	Sorafenib	FLT3	0.0137
2475	BEZ235	PI3K	0.517206
2475	GDC-0941	PI3K	0.328716
2475	Gilteritinib	FLT3	0.21344
2475	INK-128	mTOR	5
2475	MK-2206	AKT	0.0137
2475	Midostaurin	FLT3	0.226229
2475	PI-103	PI3K	0.0696871
2475	PP242	mTOR	0.566951
2475	Rapamycin	mTOR	10
2475	Sorafenib	FLT3	0.80209
2475	BEZ235	PI3K	0.320478
2475	Crenolanib	FLT3	0.0424118
2475	GDC-0941	PI3K	0.40861
2475	Gilteritinib	FLT3	0.111089
2475	INK-128	mTOR	0.0114125
2475	MK-2206	AKT	10
2475	Midostaurin	FLT3	0.0248179
2475	PI-103	PI3K	0.184288
2475	PP242	mTOR	0.143708
2475	Rapamycin	mTOR	10
2475	S31-201	Stat3	10
2475	Sorafenib	FLT3	0.280795
2570	Crenolanib	FLT3	5.03422
2570	GDC-0941	PI3K	0.039031
2570	Gilteritinib	FLT3	0.029191
2570	INK-128	mTOR	0.00686
2570	MK-2206	AKT	0.295223
2570	Midostaurin	FLT3	0.197493
2570	PI-103	PI3K	0.457137
2570	PP242	mTOR	0.0228131
2570	Rapamycin	mTOR	0.0137
2570	S31-201	Stat3	0.0946611
2570	Sorafenib	FLT3	0.504585
2131	BEZ235	PI3K	0.37057
2131	Crenolanib	FLT3	0.0137
2131	Gilteritinib	FLT3	0.0137
2131	INK-128	mTOR	0.15922
2131	MK-2206	AKT	10
2131	PI-103	PI3K	0.408269
2131	PP242	mTOR	0.487511
2131	Rapamycin	mTOR	10
2131	S31-201	Stat3	10
2131	Sorafenib	FLT3	0.0137
2624	BEZ235	PI3K	0.0218549
2624	Crenolanib	FLT3	0.0137
2624	Gilteritinib	FLT3	0.0137
2624	INK-128	mTOR	5
2624	MK-2206	AKT	10
2624	Midostaurin	FLT3	0.0137
2624	PI-103	PI3K	0.0137
2624	PP242	mTOR	0.0149792
2624	Rapamycin	mTOR	0.0137
2624	S31-201	Stat3	0.0703079
2624	Sorafenib	FLT3	0.0137
2811	BEZ235	PI3K	0.28976
2811	Crenolanib	FLT3	0.0137
2811	GDC-0941	PI3K	0.502593
2811	Gilteritinib	FLT3	0.0137
2811	INK-128	mTOR	0.0704091
2811	MK-2206	AKT	8.3418
2811	Midostaurin	FLT3	1.05645
2811	PI-103	PI3K	0.919055
2811	PP242	mTOR	0.112329
2811	Rapamycin	mTOR	10
2811	S31-201	Stat3	10
2811	Sorafenib	FLT3	0.0137
2733	BEZ235	PI3K	0.0137
2733	Crenolanib	FLT3	0.27895
2733	Gilteritinib	FLT3	7.12375
2733	INK-128	mTOR	0.0517354
2733	MK-2206	AKT	10
2733	Midostaurin	FLT3	0.0137
2733	PI-103	PI3K	0.144975
2733	PP242	mTOR	0.0416516
2733	Rapamycin	mTOR	0.0244892
2733	S31-201	Stat3	0.0137
2733	Sorafenib	FLT3	0.0137
2734	BEZ235	PI3K	0.022049
2734	Crenolanib	FLT3	10
2734	GDC-0941	PI3K	0.148035
2734	Gilteritinib	FLT3	0.107474
2734	INK-128	mTOR	0.136437
2734	MK-2206	AKT	10
2734	Midostaurin	FLT3	10
2734	PI-103	PI3K	0.859582
2734	PP242	mTOR	2.62137
2734	Rapamycin	mTOR	10
2734	S31-201	Stat3	10
2734	Sorafenib	FLT3	10
2659	BEZ235	PI3K	0.0137
2659	Crenolanib	FLT3	0.566667
2659	GDC-0941	PI3K	0.155744
2659	Gilteritinib	FLT3	0.0503351
2659	INK-128	mTOR	0.0182774
2659	MK-2206	AKT	0.354141
2659	Midostaurin	FLT3	0.220594
2659	PI-103	PI3K	0.203347
2659	PP242	mTOR	0.0285703
2659	Rapamycin	mTOR	0.0137
2659	S31-201	Stat3	10
2659	Sorafenib	FLT3	2.4995
2714	BEZ235	PI3K	0.907191
2714	Crenolanib	FLT3	10
2714	GDC-0941	PI3K	1.50049
2714	Gilteritinib	FLT3	10
2714	INK-128	mTOR	0.102787
2714	MK-2206	AKT	10
2714	Midostaurin	FLT3	10
2714	PI-103	PI3K	1.46358
2714	PP242	mTOR	1.14831
2714	Rapamycin	mTOR	10
2714	S31-201	Stat3	10
2714	Sorafenib	FLT3	10
2699	BEZ235	PI3K	0.147804
2699	Crenolanib	FLT3	0.0348007
2699	GDC-0941	PI3K	0.486616
2699	Gilteritinib	FLT3	0.0137
2699	INK-128	mTOR	0.0187264
2699	MK-2206	AKT	10
2699	Midostaurin	FLT3	0.13052
2699	PI-103	PI3K	0.126892
2699	PP242	mTOR	0.259778
2699	Rapamycin	mTOR	3.95491
2699	S31-201	Stat3	10
2699	Sorafenib	FLT3	0.0137
2725	Midostaurin	FLT3	10
2725	Sorafenib	FLT3	10
2796	BEZ235	PI3K	0.0137
2796	Crenolanib	FLT3	0.0137
2796	GDC-0941	PI3K	0.0146723
2796	Gilteritinib	FLT3	0.0137
2796	INK-128	mTOR	0.00686
2796	MK-2206	AKT	0.370083
2796	Midostaurin	FLT3	0.0137
2796	PI-103	PI3K	0.0145725
2796	PP242	mTOR	0.588527
2796	S31-201	Stat3	0.0137
2796	Sorafenib	FLT3	0.821896
2741	BEZ235	PI3K	0.051305
2741	Crenolanib	FLT3	10
2741	GDC-0941	PI3K	0.0253936
2741	Gilteritinib	FLT3	0.0515586
2741	INK-128	mTOR	0.0236208
2741	MK-2206	AKT	10
2741	Midostaurin	FLT3	10
2741	PI-103	PI3K	0.0137
2741	PP242	mTOR	10
2741	Rapamycin	mTOR	10
2741	S31-201	Stat3	10
2741	Sorafenib	FLT3	4.20776
2676	BEZ235	PI3K	8.11933
2676	Crenolanib	FLT3	10
2676	GDC-0941	PI3K	0.969807
2676	Gilteritinib	FLT3	10
2676	INK-128	mTOR	2.01309
2676	MK-2206	AKT	10
2676	Midostaurin	FLT3	10
2676	PI-103	PI3K	10
2676	PP242	mTOR	0.294753
2676	Rapamycin	mTOR	10
2676	S31-201	Stat3	10
2676	Sorafenib	FLT3	1.37725
2603	BEZ235	PI3K	0.375184
2603	Crenolanib	FLT3	0.130434
2603	GDC-0941	PI3K	0.170354
2603	Gilteritinib	FLT3	0.0137
2603	INK-128	mTOR	0.844156
2603	MK-2206	AKT	10
2603	Midostaurin	FLT3	0.131296
2603	PI-103	PI3K	0.65719
2603	PP242	mTOR	0.831708
2603	Rapamycin	mTOR	1.91251
2603	S31-201	Stat3	9.25763
2603	Sorafenib	FLT3	0.080926
2783	BEZ235	PI3K	10
2783	Crenolanib	FLT3	10
2783	GDC-0941	PI3K	0.0808046
2783	Gilteritinib	FLT3	0.193215
2783	INK-128	mTOR	5
2783	MK-2206	AKT	0.0204458
2783	Midostaurin	FLT3	6.62285
2783	PI-103	PI3K	0.127243
2783	Rapamycin	mTOR	0.035896
2783	Sorafenib	FLT3	2.77391
2602	Sorafenib	FLT3	0.0598737
2692	BEZ235	PI3K	0.0137
2692	Crenolanib	FLT3	10
2692	GDC-0941	PI3K	0.143403
2692	Gilteritinib	FLT3	1.88995
2692	INK-128	mTOR	0.00686
2692	MK-2206	AKT	5.0587
2692	Midostaurin	FLT3	10
2692	PI-103	PI3K	0.0137
2692	PP242	mTOR	0.0146659
2692	Rapamycin	mTOR	0.0137
2692	Sorafenib	FLT3	0.383803
2672	Crenolanib	FLT3	10
2672	GDC-0941	PI3K	0.247507
2672	Gilteritinib	FLT3	0.0137
2672	INK-128	mTOR	0.00687089
2672	MK-2206	AKT	10
2672	Midostaurin	FLT3	10
2672	PI-103	PI3K	0.0174733
2672	PP242	mTOR	0.0247895
2672	Rapamycin	mTOR	0.0137
2672	Sorafenib	FLT3	0.265317
2623	BEZ235	PI3K	0.536609
2623	Crenolanib	FLT3	10
2623	GDC-0941	PI3K	1.17925
2623	Gilteritinib	FLT3	2.04689
2623	INK-128	mTOR	0.746615
2623	MK-2206	AKT	10
2623	Midostaurin	FLT3	10
2623	PI-103	PI3K	0.110338
2623	PP242	mTOR	0.834022
2623	Rapamycin	mTOR	10
2623	Sorafenib	FLT3	10
2781	BEZ235	PI3K	0.145673
2781	Crenolanib	FLT3	10
2781	GDC-0941	PI3K	0.275933
2781	Gilteritinib	FLT3	0.0554042
2781	INK-128	mTOR	0.0692236
2781	MK-2206	AKT	10
2781	Midostaurin	FLT3	10
2781	PI-103	PI3K	0.459605
2781	PP242	mTOR	0.0851746
2781	Rapamycin	mTOR	4.03125
2781	Sorafenib	FLT3	0.0653178
2706	BEZ235	PI3K	10
2706	Crenolanib	FLT3	10
2706	GDC-0941	PI3K	0.339333
2706	Gilteritinib	FLT3	0.389979
2706	INK-128	mTOR	0.00686
2706	MK-2206	AKT	0.0469977
2706	Midostaurin	FLT3	5.99133
2706	PP242	mTOR	0.115197
2706	Rapamycin	mTOR	0.0137
2706	Sorafenib	FLT3	0.597752
2749	BEZ235	PI3K	0.493319
2749	Crenolanib	FLT3	10
2749	Gilteritinib	FLT3	10
2749	MK-2206	AKT	10
2749	Midostaurin	FLT3	10
2749	PP242	mTOR	0.0172984
2749	Rapamycin	mTOR	10
2749	Sorafenib	FLT3	0.0137
2594	BEZ235	PI3K	0.0137
2594	Crenolanib	FLT3	0.0735332
2594	GDC-0941	PI3K	0.171793
2594	Gilteritinib	FLT3	0.0297395
2594	INK-128	mTOR	0.0167379
2594	MK-2206	AKT	0.367808
2594	Midostaurin	FLT3	0.127745
2594	PI-103	PI3K	0.0672055
2594	PP242	mTOR	0.130158
2594	Rapamycin	mTOR	0.0137
2594	Sorafenib	FLT3	0.969168
2795	BEZ235	PI3K	0.0137
2795	Crenolanib	FLT3	0.703261
2795	GDC-0941	PI3K	0.0485746
2795	Gilteritinib	FLT3	0.0137
2795	INK-128	mTOR	0.00686
2795	MK-2206	AKT	1.08898
2795	Midostaurin	FLT3	5.45948
2795	PI-103	PI3K	0.0207162
2795	PP242	mTOR	0.0384943
2795	Rapamycin	mTOR	0.0137
2795	Sorafenib	FLT3	0.165047
