# Supplementary material for: Unveiling the signaling network of FLT3-ITD AML improves drug sensitivity prediction
Source: eLife. 2024 Apr 2;12:RP90532. doi: 10.7554/eLife.90532 (PMC10987088; doi:10.7554/eLife.90532)
Supplement: Supplementary file 7. [file elife-90532-supp7.xlsx]

## Sheet: Sheet1
Supplementary file 7
Panel of 262 mutations relevant to hematological malignacies analyzed in de novo AML cohort of 14 patients
ABL1	CD79B	FGFR1	JAK3	P2RY8	SGK1
ACD	CD83	FGFR2	KDM6A	PAX5	SH2B3
AKT1	CDK4	FGFR3	KIK3R1	PDCD1LG2	SMARCA4
ALK	CDK6	FLT3	KIT	PDGFRA	SMARCB1
ANKRD26	CDKN1B	FOXO1	KLF2	PDGFRB	SMC1A
ARAF	CDKN2A	GATA1	KLHL6	PDS5B	SMC3
ARID1A	CDKN2B	GATA2	KMT2A	PHF6	SOCS1
ARID1B	CDKN2C	GATA3	KMT2C	PIGA	SPEN
ARID2	CEBPA	GNA13	KMT2D	PIK3CA	SPIB
ASXL1	CHEK2	GNAS	KRAS	PIK3CB	SRC
ASXL2	CIITA	GPR34	LCK	PIK3CD	SRSF2
ATM	CKS1B	GTF2I	LMO2	PIM1	STAG2
ATRX	CNOT3	HIST1H1B	LTB	PLCG2	STAT3
B2M	CRBN	HIST1H1C	MAP2K1	POT1	STAT5B
BCL10	CREBBP	HIST1H1D	MAP2K4	POU2AF1	STAT6
BCL11A	CSF1R	HIST1H1E	MAP3K1	POU2F2	STK11
BCL2	CSF3R	HIST1H2AC	MCL1	PPM1D	SUZ12
BCL6	CTCF	HIST1H2AG	MECOM	PRDM1	SYK
BCL7A	CTNNB1	HIST1H2AM	MED12	PRKCB	TBL1XR1
BCOR	CUX1	HIST1H2BC	MEF2B	PRPF8	TCF3
BCORL1	CXCR4	HIST1H2BD	MET	PTCH1	TENT5C
BIRC2	CYLD	HIST1H2BG	MGA	PTEN	TERC
BIRC3	DDX3X	HIST1H2BK	MPEG1	PTPN11	TERT
BLM	DDX41	HIST1H3B	MPL	PTPN2	TET2
BRAF	DIS3	HIST1H3G	MSH2	PTPN6	THRAP3
BTG1	DNMT3A	HLA-A	MSH6	PTPRC	TLR2
BTG2	DTX1	HLA-B	MTOR	PTPRD	TMEM30A
BTK	EBF1	HLA-C	MYB	RAD21	TMSB4X
CALR	EGFR	HRAS	MYC	RAD51	TNF
CARD11	EGR1	ID3	MYD88	RASA2	TNFAIP2
CASP8	EGR2	IDH1	NF1	RB1	TNFAIP3
CBFB	ELANE	IDH2	NF2	RCOR1	TNFRSF14
CBL	EP300	IGH	NFE2	REL	TP53
CCND1	ERBB2	IKBKB	NFKB1	RHOA	TRAF3
CCND2	ERBB3	IKZF1	NFKB2	ROS1	U2AF1
CCND3	ETNK1	IKZF3	NFKBIA	RPS15	U2AF2
CCNE1	ETV6	IL2RG	NFKBIE	RUNX1	UBR5
CCR6	EZH2	IL7R	NFKBIZ	SAMD9	VAV1
CD22	FAS	IRF1	NOTCH1	SAMD9L	WT1
CD274	FAT1	IRF4	NOTCH2	SETBP1	XPO1
CD28	FAT3	IRF8	NPM1	SETD2	ZFP36L1
CD58	FAT4	ITPKB	NRAS	SETDB1	ZRSR2
CD70	FBXO11	JAK1	NSD2	SF1
CD79A	FBXW7	JAK2	NTRK1	SF3B1
